# Supplementary material for: Global transcriptome dissection of pollen–pistil interactions induced self-incompatibility in dragon fruit (Selenicereus spp.)
Source: PeerJ. 2022 Nov 1;10:e14165. doi: 10.7717/peerj.14165 (PMC9635355; doi:10.7717/peerj.14165)
Supplement: Table S1 [file peerj-10-14165-s009.xlsx]

## Sheet: Supplement Table 1
Table S1. Extension of pollen tube at different time points after pollination
Pollination way	12 hap	24 hap	36 hap	48 hap
Self pollination	17.5(2.1)% *	48.5(3.8)%***	50.2(1.2)%***	50.4(0.8)%***
Cross pollination	19.9(3.2)%	69(4.1)%	99.3(0.7)%	100(0)%
Note: the data indicate the percentage of pollen tube and style length with standard error,"*" or "***" means the tube extension is significantly different between self and cross pollination with p-value<0.05 or p-value<0.0001
