# Supplementary material for: Global transcriptome dissection of pollen–pistil interactions induced self-incompatibility in dragon fruit (Selenicereus spp.)
Source: PeerJ. 2022 Nov 1;10:e14165. doi: 10.7717/peerj.14165 (PMC9635355; doi:10.7717/peerj.14165)
Supplement: Table S2 [file peerj-10-14165-s010.xlsx]

## Sheet: Supplement Table 2
Table S2. Preview of the sequence quality for the samples in this study
Sample	Raw Reads	Clean Reads	Clean Bases	Error(%)	Q20(%)	Q30(%)	GC Content(%)
Pollen	23181729	22665242	6.8G	0.03	97.56	95.24	47.92
Control-1	48076254	47048894	7.06G	0.02	98.71	96.28	48.92
Control-2	22823336	21797998	6.54G	0.02	98.74	96.39	48.4
Control-3	22787388	21699119	6.51G	0.02	98.82	96.49	49.17
SP12-1	23060516	22169758	6.65G	0.02	98.76	96.39	48.74
SP12-2	23088278	22115520	6.63G	0.02	98.85	96.55	49.72
SP12-3	67382930	64740084	9.71G	0.02	98.78	96.41	48.86
SP24-1	23925936	22917267	6.88G	0.02	98.76	96.38	48.54
SP24-2	22942096	21921946	6.58G	0.02	98.71	96.25	48.3
SP24-3	23091323	22183143	6.65G	0.02	98.83	96.52	48.99
SP36-1	25140742	23961520	7.19G	0.02	98.84	96.53	49.79
SP36-2	47822102	46874070	7.03G	0.02	98.77	96.39	49.09
SP36-3	46533376	44392402	6.66G	0.02	98.87	96.56	50.1
CP12-1	51296034	49817902	7.47G	0.02	98.73	96.32	48.68
CP12-2	22823367	22041135	6.61G	0.02	98.72	96.28	48.75
CP12-3	23268122	22480436	6.74G	0.02	98.36	95.21	50.69
CP24-1	24861696	24347294	7.3G	0.02	98.77	96.36	49.85
CP24-2	25573311	25178635	7.56G	0.02	98.84	96.53	49.37
CP24-3	26589928	26161672	7.84G	0.02	98.78	96.41	48.65
CP36-1	26406643	26016120	7.8G	0.02	98.78	96.4	48.73
CP36-2	22316148	21987709	6.6G	0.02	98.79	96.4	49.35
CP36-3	23698420	23374416	7.02G	0.02	98.98	96.86	50.41
