# Supplementary material for: Global transcriptome dissection of pollen–pistil interactions induced self-incompatibility in dragon fruit (Selenicereus spp.)
Source: PeerJ. 2022 Nov 1;10:e14165. doi: 10.7717/peerj.14165 (PMC9635355; doi:10.7717/peerj.14165)
Supplement: Table S3 [file peerj-10-14165-s011.xlsx]

## Sheet: Supplement Table 3
Table S3. The randomly selected sequence and corresponding primers
ID	Forward primer	Reverse primer	product size	gene sequence
c125856_f5p16	CCGTTTGCCGCTACCCGATAATAG	TGAATGTGAACTCCTCCTGCTTGAC	126	CACACATTTATGATAGAGAGAGGGAGAGAGAGAGCTCTTCTTCATCTTTCTCTCTCCTCCCAATTTCCACACCTTTCGAATCAGATCCAATGCTAACTAAACTAGAACAAAAACACCCCCAACATTATTTTCACCTCCTTCTTCGTCTTCTTCTTCCCAACCCTCTTTAATGCCTGTCGCTTCAATTTTAACCGACATATTAAAATCTGGGTTCAGTTTTTCTCTCTCCTATTTATGAGTTTCTGGGTGTGAACCCAGATTTTTCAATTCAATTTCACTATTCGGAAACCCTAGAAACCCTAATTTCATGGCGACGAGGGGGTCCAGATCGGAGAAAGTGAAGCGAATTTTCCAGCAATTTGATGTCAACAAAGATGGGGGTCTCAATCGGGCAGAAAT…
c136674_f1p0	GAAGATTGCTGCTCCATCCACTCC	CCATGTTTGCCAAGGCTATGATGC	84	CCCCCTCTCTCTCTCTCTCGAACTTGGTGGTGTGAACTGTGAACCGTGCACAGGAAGCTGCAATCTTTCGCGAGCTAGTGATTTTTGAATTATGGATTTGAATGAAATTCCAAGTGATCAAACTGTGAACACAATGGAATTAGGCGAGAAAATTTTGGCCCTGGAATTGGAAATTGGGAAGAAGATTATGGAGTTAGATACAATTAGGGTTAGAATTAGGGCTTTAGAAGGCGAAAAGGCTGAAATTGAGCGAGATGTTGAGGTTTTGAAGAAGAAGAAGAAGAAGGTCGCTGTCCAGGGGGTGGAAGTTGGTGAATTGTCGTTGGATGACTGGAATATGGAGAGTGCTGAAGAGTCTAAGCTTGATCAGTTGATGATTGAGAATAAGGTTTTGGAATG…
c137273_f1p1	GGGAGCCGAAGGGATCTTGAATTG	CTACCAATGCGACCGATCAGGAAG	80	AACCGCGCCTCCATCGAAATCAAAGCAGGAGAACCCGTGTTTGTCGTCATCAAACTCAAGCAGAGATGAGCATAACGTCGACAGCGCCAAAATGCTCAAGATTGCTACGATTACTCCGAACCCAGAACCCTAATTGTCGAGCTTCCTTCATTCATTTAGCCACCGAAAAACCCTCTGCTCATAGACTACACAAGGCCCTACCATCATCATCACCAGCTCCTCCTCCTCCTCCTCCTTCTCCAGTCATAGCCCAACTCATCGAAGTCCTCAAGTCCGAGGACAATGGTAGCTCTGAGGAGAATGAAAAGCTTGTCGAAATCCTCACGTCCTTGGGTATTCATTCTCTCTCCTCTGATCAATTGCTTCAGATCACTCGCAGATTGCCCGATTCTTCCACTG…
c139070_f2p0	GGTGTTGATGGCGTTAAAGTGGATG	TGCCTGGTGGTACTGCCTAGTG	99	CCACTCTCTATCATCTAAGCTTCTTCATTTTTCTAGTGGATTCTCTGTCCTCTGAAATTGAATTCGTGGTTGACATTGCTTGCTTTTGGTTCGTGCATATTGCCGATCTTGCAGGAGGCAGTTGCTGAACCATCGTCGTCGGTTCTGGGTTGAAGCATTCGAGGGGAGCGAGGTGTTAGAGAAACAAAGAGAAATGACAATTGCACCAGCAGTTCGGATCTCAGATCGGAAAGTAATCGTAAAAGACCGGACAATCTTAACCGGAGTACCTGATAATGTAATATCAACCTCCGGTTCATCGTCCGGTCCGGTTGAGGGAGTCTTCATTGGGGCTGAGTTTGATGAAGAAAACAGCAGCCAAGTTGTCTCATTGGGTACTCTAAGAGATGTTCGGTTCAT…
c164988_f1p2	AGGAGCCGTCAGAGTTGGTCAC	ACAAGTGCGATTGCCTGGACAG	148	AAAAAAAAAAGGAGTAGCGCAATTGCAGTGTGGTAGTGGAAACCCTAATTCTCTCACTTTCTTCTCCGATCACCGCCAGCGCCGATGTTGCTCCGTTCGAATCGCAGACTTTCAGGGAATGCTGCAAGGGACATTTCTCAGTCAGATGATGTACCCACACAACCAAAACCTGAGGGAAATCATGATTCACCCATTAACATGGAGGTGCGAGATTTTTTTCTGCAGAATTCTGCTTCTGACACTGATGACATAGGAAGCAGTGATGGTGATTATGATATAGACAAAGAGATGTTAGATTTAAATGAGCCTCCAGATGTTGCTGACAGTTACTTGGATGAAGATGATGATTACAGTGATGATGGCGATGAAATTGATGACCAAGAAGTTAAGAGAACAAAA…
c168703_f1p0	CGGGAAACGGCGAACAGACATC	GCTCCTCCTCTTGTGCTTCTTCTTC	132	ATCATTCCTCTCAAATCCAAACCAAACCAAACACACGACAGGCGCACCAACAACAACACCCAAAAGCCAACCCCAAACCCAAAAAAAAAAGAAAAAGAAAAGGAAAAAGAAGAAGCTCCTAAAATTTTACTTTATTTTGATAAAAAAAATGGAGGAAAGGGAAGAAGATCCACCACCATTCTGGCTGCAGAGCACCACCGCTCTCCACGACGCCCACCGCCACCGCCGCCGCAATCGCCACCAGGCATCCTCTTTCCTCCTCAACACTGGCGTTCTCGTCGTGTTCTTGCTTGCGGCCGCCATTGTTTTCCTGGTGATTGTGATCCCCTCTGTTCTATCTCTTGCTCGCCAGGTCTTCAACCCTAGCGCTGTCAAGAGCAGCTGGAATTCGCTCAACAT…
c189421_f4p0	GCTGGTGGAGATCGTTACTCTGTTG	CTGGGTTGGATCATCAGGGTTGTG	81	CCATCTCATTATCACAGTAATCAGCATCAGAGTTGCTTGATCCTGTTTCTCTTTGATTTGATCTGATCCGATCTGGTTTGATTTGATCAAAGAGCCCCAACAACAATGGAGTTCCCATTTGGCCACCACCACCACCACCACCACAACCGCCCTGACGAGGAAGAATCCGGCAGATTCCCCCAACCACCACCACCCTTCTCATCTTCCCCATTCCCTCCTCCTCATCAGCCCCCCTTCGCCGGTGGCCCGTACCCACCTTCCTCCGGTCCCTACGGCGGCGAATACAACCGCCCGCCACCACCCGGAGCTTACCCACCGCCGGAATCTTACCCTCCGCCGCCGGTTTCTGGGGTTTACCATTCATCCCACACTCCCCACCTCGAAACTCCGGCGTACGCG…
c28268_f2p0	TGACGATCTGCCAGAGGACAAGG	TCTCCGAGTGTGAGCCCATAGTTC	80	ATAACTCAAACAACATCCATATCTTCTTCAGCAAACCAAAGCTTAGAGCTCTTTAATTTGCTTAAGGGTTCGTTGTTGTTAATTATTCAAGAAGACCAGATTAGACATGTTTTCGGGGCGAAAGGCGATGCCGGAGACGATGAACAAGTCGAGCTTTGCTCAAACATGCAACAGGCTGAGCCAGTTCTTGAAGGCGAGGAGGTCTCTTGGTGATTTTGCTTCCTTTCAGAATATGTCTTCTTCCATGCTTGATATCAATGGTGCTAAAGAGATTATGAGTGGATCAACCAACGCAACGATGAATTTGTTTCCAAAGAAAATGGCAGAAGAGAAGAATGTTTCGGCAGGAGAAGAGAATATCAAGTCTTTAGACCTCTTTCCTTTGACCAGTTCATCGGC…
c28803_f16p11	AGGAGGTGGACGAGCAGATGATC	GAGGTTGAGTTCCCGATGAAGGTG	148	ACCCCATCTTATCACTCCCTCACTCCCGGACACTCTCTCTCTCTCTCTCTCTCTCTCTTTGTCTCTCTAACTTCGGATCTTCTTCCTAACAGGAAAAATGAGAGAAATCCTTCACATTCAGGGTGGGCAGTGTGGTAACCAGATTGGGTCTAAATTTTGGGAGGTTGTGTGTGATGAGCATGGCATTGACCCTACTGGAAGATACGTCGGCACATCTGACTTGCAATTGGAGCGTGTTAATGTTTACTACAATGAGGCTTCATGCGGTAGATTTGTTCCCCGTGCTGTGTTGATGGACCTTGAGCCCGGTACCATGGATGCCGTTAGGACTGGCCCATATGGACAGATCTTCCGTCCTGACAACTTTGTCTTTGGACAATCCGGTGCCGGTAACAACTG…
c32008_f4p0	GCCCTCTCTTCATCAACCTCAACTG	ATCACCCATCACCAAGCACTTTACC	138	ACTCCCTCTTGCTCACGCCGTATACTGTTCGGGAAAGGGAGACCTGAGAAGGCTCACGAACCAAAAAGCGATCACTTCTACACTTATAGTTCAAGCCACTGCGTTTGTAATTAACATGGCGACTTCGGAGAAATCGGTGTTGGCTGTGATCAGAGCAGCGAGACCTTCCTTCAGAAACAACCACGACAAGGTGGCTTTTGCGGTTCACGCATCGTTTCTCGCCGCGGGGTTCGTACTTACTGCCACCGGCCCTCCTGCTTTTGCCGAGAATGCCCTCTCTTCATCAACCTCAACTGATGAGGTAGGAATTGATCACTGGAATGAGTTGGATGATGAATACGCTTTTCTGTATGTTAACCCTGAGAAGGGCAACAAGAAGGTGCTGGTAAAGTGCTTGGT…
c35060_f1p0	GCCGTGCTGATCCGTACAATCTG	AAGCCTAACTGTCCTCTCCATCTCC	125	CTTTCCCGCATTCAACCTCGAATTCATGAGACTAGAGAGAGGATGTAGCTCTGCATCAGTCTAAACCATCAATAGTCGCACCAAAAACCAGCCCCTTGATTTACATAAATCTCAAAAAAAAGGGGGAAACACTATTTCATCGACCGCCGATCGTGGCCGCATCCACCGCCGTCCACCACCGCATCGCCGCCGTCGGGCCACTTATTTCGTCATCCAGGTGTATCAATGTTGAATATATTTTGCACATGTGAGAAAAGGCGAAAGGGCACGGCAAAGTAAGACAAACAAATGGCATTGTAGCAATGGTAGCCCAGGAGAAGGATATGAGCAGCTGACAAACTTACTTATGCTACCCATTTGGTGTGTTCTTGGTGATCACGATCCTTGATTTCTTAAGAT…
c37999_f1p1	AGCCCCACAATTTGAGCCATCG	CCACTTGGATCAGGTGTAACTCGTC	87	ATCACTCATCCCCAATTTTCTCTCCCTTTCTGTGATACCCACATCAAAATTTCAGGAAATAGTGCAAAACCCAGATCAAAGATTCAATCTTTTTGTGTTTACGTTGAGACCCAGATCAGAATTTGAGTTTAATTTGGCAAAATTTCGAGGCAGAAGCCATGTTTAGTGAAGACCCAGATTGCAAGTCGAAGCAAATCGTGATTAGGGAAGTATGGGCAGCTAATTTAGAGTCTGAATTTGAGTTAATTAGGGATTTAATTGACGATTACCCTTTCATCTCCATGGATACTGAGTTTCCCGGCGTGATCTACCGGCCCAAAAAGCCCCACAATTTGAGCCATCGCCGGCCGTCCGATCTCTACCGCTTCCTCAAATCCAACGTTGACGAGTTACACCTGA…
c38298_f1p6	AACCCACAAACCTAAGCCCAAACC	AGAGTAAGCCGTTGAGCACATTAGC	143	ACCCTCCAAATTAAAACCCTATTCTCTTATACATCTTTACTCCCAAAAACTTTACTCTTCAGGGCTATTGGCATGGCTAAGTTCTCTAAGTCATCCCTTGCTCTCTTCCTAGTCCTAAATCTTCTCTTCTTCACCTTCGCCTCCGCATGTGGAGAATGCGGAATCCCTCCAACCCACAAACCTAAGCCCAAACCCAAGCCCAAGCCCACACCCCAGCCCAAGCCCACACCCCAGCCTGCTCCGAGTGGTGGGACTTGCCCGATTGATGCCCTTAAATTAGGAGTATGTGCTAATGTGCTCAACGGCTTACTCTCGCTCACACTCGGAGCCCCTCCGAAGGAGCCTTGTTGTTCCCTTATCAAAGGGGTCCTTGATGCTGAGGCTGCTGTCTGCCTTTGC…
c40087_f1p0	CACCACCAACAACATCGGGAGAG	CTCTGACTTCTCTTGCTGCGATACC	143	ACACTCGTTCATTCCAAATTCCCCTACTCTTCTTTCTCTCATAACCCCTCAAAACATTATTAGCAAACACCATGTACGGCCATTTTAACAGCTCTCTTTACGATAATAATTCCACTGGTTACTTGAGCCCGTCCTACCCTTCCCATTTCTCTCCTTTTATGCCCCAATCATGCACAAATGGTGATTTTGACTCCATAGCTCAACGAGGGAACTGGAATGGTAGTAGTAATAGTGGCACAAGCAATAGTTACGTAGGCTCGCCAAGTTCACCTCTAAGTTGCTGTACTAGCAGTCACCCACAAATTTCTGCTAATAACATGATTCAAAGAAGCCTCAGTAGCCACTCCCTTCATAAAAATGGGCTTTACCCTCCTGTTTCATCTCCTTCTGTACTCTATG…
c67579_f1p0	GTAAACCTCCGTCACCAGCAGTTAG	CGTCGCAAATCGTCCTCATTCTCTC	126	CAAATAGAAACTCAAAAAAAGGCAAGACAAATTTCTTTCGACTTCCGATCCCTTCGCCTCATTTTATCTTTTTTTTCCCCCCTTTAAAATTGGAGCTCCGTAGTTGGCTGCTGCAATTAACGATTGCTGAAGTAAACCTCCGTCACCAGCAGTTAGAATTTGGAGGCTGTCTGTCTGAGACAGGTATGGCATGAGAAGAGAGAGAATTCATTCCTAGAGAGAGAAAGTAAGAGAGAGAATGAGGACGATTTGCGACGTTTGTGAGGGCGCCGCCGCCATTTTCTTCTGCGCCGCCGATGAGGCCGCTCTTTGCCGTGCTTGCGATGAGAAGGTACATATGTGTAACAAGCTTGCAAGTCGACATGTGCGGGTTGGGCTTGCTGCCCCTAGTGATGTACC…
c68894_f2p2	CTGGGATACTGCTGGTCAAGAAAGG	TTCAAAGGTCACATGGCGGGTAAC	109	CTCATTCTTCCCCCAATTCGAAAAACATCCAGAGGGGGGAGACCCAAAAAAAAAAAAACTCAAAAAATTTGCATCAAATTAGAGAGAGAATTGATTAAACAGGAAAATTAATAAAAACCCATTTCGATTTCAATTTCAGTTTCAGTTTCAATTCAATGGCGGCGTACAGAGCAGATGATGATTATGATTATCTATTCAAAGTGGTTTTGATTGGTGATTCGGGTGTTGGGAAATCTAATCTTCTTTCTCGATTCACTCGCAATGAATTCAGCCAAGAATCTAAATCCACAATTGGGGTTGAATTTGCCACTCGCAGCATCCGCGTTGATGATAAGATTGTCAAGGCTCAAATCTGGGATACTGCTGGTCAAGAAAGGTACCGAGCAATCACCAGTGCAT…
c70139_f1p1	TTGCTGATGCTTTGAGAGGAACTGG	CATGCGAAACTTGGCCTTTGTCTTC	125	CTTTGCCCTTTCCCACACCCCAGTTCTTCTGTTTTATCTCGTTAAGTCTTCGTCTTCTCAACCCAATTCTTGAATACCCATTTGGGAATTCTGCTGTTTTTTAATCCGAATTTCGATCATGGGGGATGCCAATGTTGTCGAAGCAAAGGATGGAACCATCTCTGTGGCTTCTTCATTTGCAGGTCATCAAGAAGCTGTGCAGGATAGAGACCACAAATTCTTAACAAAAGCAGTTGAAGAAGCCTACAAGGGGGTTGACTGTGGAGATGGGGGTCCATTTGGTGCTGTTGTTATTTGCAATGACGAAGTAGTTGTCAGCTGTCACAACATGGTATTGAAACACACAGACCCAACTGCACATGCAGAAGTTACTGCTGTAAGAGAGGCATGTAAAAAGCT…
c705_f8p4	AAGAGGAGGAGAAGCACCACCAC	AGGCATAAGCACCAGCAGCAAG	144	CCACCAGTTTGTTCACTATTAAGATAAATTTAATTTGGTTTTAGTTTGGTTAATTAATCAAAATTAATGGCAGAAGAGGAGGAGAAGCACCACCACCACCTCTTCCACCGCCACAAGGAGGAGGAAGGGCCGAAAGACCCCGAGAAGGAGTTGAAGCACCACAAGCACCTTGAGCAGCTCGGCGGGGCTGCCGCCCTTGCTGCTGGTGCTTATGCCTTGCATGAGAAGCACAAGGCAAAGAAGGACCCAGAGAACGCCCACCACCACAAGCTGGCGGAGGAGATAGCGGCCACAGCAGCAGTAGGAGCAGGTGGTTTTGCTTTCCATGAGCATCACCAGAAGAAAGAAGCCAAGCATGAGCTGAAAGAGGAGCGTCACCACCATTAAATTAATTAATCA…
c95409_f1p2	CAGAGAGTGCCCGAGATACTACCC	TTATGATGCCTCAGCGGAATCCATG	107	ATAGGTATTGGACACTTCGCTTGTTCGATCGGCTTTACGTTTTTCTCTCTCTAATTTCCTTCCTTTCCTCTCAATTCGTTTGGTGGAGGTTATCAAAGAAGAAGAAAAAAAATCCTTTGGTGGAATTATTTGGATCCCTTCCATTTCAACCCTCATTTTCTGAGGTCACCGTCTCCCTCTTTCTCTCAATCTCCTTGACAATTTGGGTTTCTACTAGTTTGCCTACGTGATGACTGAATGATCATTTTAGATGTTTTGATGATAGCAATTGGAGATTGAAGAATAGAGGGGAAAATTCACATTTGCTTTTAATATGTCTGCTGTCGGTGTACTTGTTTCTGATCCATGGCTTCAAAGCCAATTCACTCAAGTGGAGTTACGCACTCTCCAGTCTAAGTT…
c97342_f1p0	GCCCTAGAGCATGTCGTGTTTCC	GCTTCGCATCCCAGAACTAAGACTC	91	AGAAGAGAAAGTTCCCTAAGCAGGAGAATTTGGAAAATCCAAGTCTTTACCATTATGCTCTTTTTTCTGACAATGTCCTTGCTGCGTCCGTTGTTGTGAACTCCACTATCATGCATGCTAAGGAACCTGAAAAGCATGTGTTTCATCTTGTAACTGACAAACTCAATTTTGGTGCGATGAACATGTGGTTTCTTTTGAACCCTCCTGGGAAAGCCACAATCCATGTTGAAAATGTTGATGAATTCAAGTGGCTAAACTCATCATACTGTCCAGTTCTGCGTCAGCTTGAGACTGCTGCCATGAAGGCATATTATTTCAAAGCAGATCATCCAACCACTTTCTCATCTGGGGCATCCAGTCTGAAGTACAGGAACCCAAAGTACCTGTCAATGCTGAACC…
