# Supplementary material for: Global transcriptome dissection of pollen–pistil interactions induced self-incompatibility in dragon fruit (Selenicereus spp.)
Source: PeerJ. 2022 Nov 1;10:e14165. doi: 10.7717/peerj.14165 (PMC9635355; doi:10.7717/peerj.14165)
Supplement: Table S4 [file peerj-10-14165-s012.xlsx]

## Sheet: Supplement Table 4
Table S4. Modules classified by WGCNA. The 6353 DEGs were classified into ten modules named with colors
Module name	ID
black	c100752_f1p1
black	c102384_f5p14
black	c103499_f1p1
black	c103703_f2p35
black	c104667_f1p1
black	c105504_f2p0
black	c106337_f6p3
black	c1199_f5p3
black	c125890_f6p7
black	c126075_f4p13
black	c126157_f4p2
black	c12761_f1p3
black	c128231_f1p4
black	c128705_f1p0
black	c129492_f1p1
black	c129605_f1p0
black	c129913_f1p0
black	c13009_f1p1
black	c130397_f1p5
black	c130879_f1p1
black	c131567_f1p4
black	c131794_f1p0
black	c132731_f1p4
black	c133408_f1p1
black	c134163_f1p2
black	c134261_f1p0
black	c134506_f2p8
black	c134896_f1p3
black	c137016_f1p0
black	c138153_f1p2
black	c138338_f2p6
black	c139524_f1p0
black	c139951_f1p2
black	c140569_f1p1
black	c162046_f1p2
black	c162227_f1p4
black	c163035_f1p2
black	c163312_f1p6
black	c163571_f1p4
black	c164229_f1p0
black	c166031_f1p0
black	c166448_f1p4
black	c168703_f1p0
black	c168956_f1p5
black	c1694_f3p0
black	c170709_f3p4
black	c173984_f3p1
black	c1750_f3p1
black	c178536_f1p5
black	c188858_f3p2
black	c189262_f5p10
black	c189328_f5p4
black	c189391_f5p1
black	c193918_f1p6
black	c2050_f4p0
black	c205985_f1p3
black	c206149_f1p0
black	c207009_f1p0
black	c2086_f2p0
black	c23304_f11p9
black	c266_f6p6
black	c27025_f33p30
black	c27431_f22p10
black	c27484_f5p9
black	c27719_f8p8
black	c28006_f3p8
black	c28012_f8p3
black	c28147_f3p3
black	c29123_f2p1
black	c29128_f2p0
black	c29563_f1p2
black	c29621_f2p0
black	c30479_f3p2
black	c30912_f1p1
black	c31650_f2p0
black	c31881_f1p2
black	c32433_f1p3
black	c32492_f1p35
black	c3465_f1p0
black	c3540_f2p0
black	c36224_f1p2
black	c36674_f1p0
black	c36703_f1p0
black	c37456_f2p0
black	c37999_f1p1
black	c38031_f1p0
black	c38408_f1p0
black	c38763_f1p0
black	c39398_f6p6
black	c39766_f2p9
black	c39804_f1p1
black	c39923_f2p2
black	c40143_f3p0
black	c41691_f1p1
black	c41706_f4p6
black	c60486_f52p9
black	c61165_f2p4
black	c62236_f1p1
black	c62998_f1p2
black	c63328_f1p2
black	c63375_f2p0
black	c63763_f1p0
black	c65540_f3p0
black	c67084_f2p1
black	c67617_f1p0
black	c67978_f1p0
black	c68623_f1p0
black	c70139_f1p1
black	c70523_f1p1
black	c7108_f1p2
black	c71311_f1p0
black	c72735_f1p0
black	c7610_f1p1
black	c92869_f3p8
black	c92918_f10p7
black	c93001_f4p5
black	c93247_f2p31
black	c9324_f1p0
black	c93686_f1p12
black	c94016_f2p6
black	c98197_f1p1
black	c99698_f3p2
black	c99890_f1p2
black	c99936_f1p7
black	c99961_f1p1
blue	c100019_f1p1
blue	c100075_f8p8
blue	c100129_f1p1
blue	c100139_f1p1
blue	c100149_f1p0
blue	c100219_f1p0
blue	c100226_f1p3
blue	c1002_f7p4
blue	c100305_f1p1
blue	c100393_f4p11
blue	c100407_f1p1
blue	c100440_f4p6
blue	c100442_f1p0
blue	c100534_f1p4
blue	c100555_f1p3
blue	c100578_f1p2
blue	c100630_f1p18
blue	c100769_f2p1
blue	c10078_f1p1
blue	c100800_f1p24
blue	c100851_f1p0
blue	c100892_f1p1
blue	c10098_f2p0
blue	c100996_f1p3
blue	c101000_f1p1
blue	c101062_f1p3
blue	c10107_f2p0
blue	c101184_f1p16
blue	c101261_f1p1
blue	c101314_f1p2
blue	c101363_f1p2
blue	c101364_f1p2
blue	c101389_f2p0
blue	c101549_f2p1
blue	c101594_f1p2
blue	c101642_f1p0
blue	c101655_f1p1
blue	c101688_f1p6
blue	c101718_f1p0
blue	c101727_f1p0
blue	c101775_f1p2
blue	c101817_f2p2
blue	c101896_f2p1
blue	c102038_f1p1
blue	c102071_f1p3
blue	c102077_f2p1
blue	c102149_f15p13
blue	c102188_f1p3
blue	c102255_f1p2
blue	c102258_f1p4
blue	c102296_f1p0
blue	c102300_f1p1
blue	c102311_f2p1
blue	c102417_f1p1
blue	c102434_f1p0
blue	c102442_f1p1
blue	c102455_f1p1
blue	c1025_f9p2
blue	c102678_f6p2
blue	c102679_f1p5
blue	c10272_f1p0
blue	c102780_f1p3
blue	c102800_f1p4
blue	c102851_f1p1
blue	c102881_f1p3
blue	c102887_f1p1
blue	c102909_f1p3
blue	c102945_f1p1
blue	c1030_f6p4
blue	c103142_f2p0
blue	c103151_f1p2
blue	c103280_f1p1
blue	c1032_f4p4
blue	c103309_f2p2
blue	c103327_f3p3
blue	c103377_f1p0
blue	c103379_f1p1
blue	c103384_f1p0
blue	c103485_f1p1
blue	c1034_f5p1
blue	c103506_f2p10
blue	c103514_f1p0
blue	c103519_f1p1
blue	c10353_f1p1
blue	c103609_f1p1
blue	c103679_f1p6
blue	c103695_f3p6
blue	c103710_f1p2
blue	c103734_f2p2
blue	c103746_f1p0
blue	c103772_f1p0
blue	c103805_f3p4
blue	c103810_f1p7
blue	c103845_f1p1
blue	c10387_f1p0
blue	c103951_f2p2
blue	c104012_f1p5
blue	c104106_f1p1
blue	c104157_f1p0
blue	c104170_f1p0
blue	c104200_f1p1
blue	c104209_f1p3
blue	c104248_f1p0
blue	c104343_f2p4
blue	c104406_f1p3
blue	c10459_f1p20
blue	c104725_f1p4
blue	c104764_f2p1
blue	c104797_f1p0
blue	c104930_f1p0
blue	c104996_f1p4
blue	c105097_f1p1
blue	c105383_f1p2
blue	c105485_f1p0
blue	c105515_f1p2
blue	c105517_f1p1
blue	c105526_f2p4
blue	c105549_f1p1
blue	c105589_f1p1
blue	c105599_f1p2
blue	c105617_f1p2
blue	c105688_f1p2
blue	c105704_f1p4
blue	c105764_f1p1
blue	c105970_f4p3
blue	c105977_f2p15
blue	c106188_f1p1
blue	c106215_f1p4
blue	c106287_f1p3
blue	c106384_f1p2
blue	c106385_f1p1
blue	c106580_f3p3
blue	c106633_f1p0
blue	c106650_f1p3
blue	c106678_f28p7
blue	c10680_f1p1
blue	c107148_f1p4
blue	c10736_f1p1
blue	c1077_f4p4
blue	c108519_f1p0
blue	c109381_f2p2
blue	c10980_f1p0
blue	c110064_f4p8
blue	c110659_f1p0
blue	c11086_f1p2
blue	c11126_f1p1
blue	c111287_f7p7
blue	c1114_f4p1
blue	c11223_f1p5
blue	c11260_f1p1
blue	c11262_f1p1
blue	c11307_f4p6
blue	c113258_f1p6
blue	c11333_f1p1
blue	c113399_f1p3
blue	c11384_f1p0
blue	c11628_f1p0
blue	c11652_f1p0
blue	c11684_f1p7
blue	c11785_f1p0
blue	c11842_f1p0
blue	c11885_f1p0
blue	c11989_f1p1
blue	c12099_f1p1
blue	c123177_f3p2
blue	c124279_f3p12
blue	c125185_f4p4
blue	c125206_f25p15
blue	c125208_f27p7
blue	c125259_f1p2
blue	c125264_f3p1
blue	c125317_f3p4
blue	c125389_f35p14
blue	c125455_f72p23
blue	c12553_f1p2
blue	c125607_f60p66
blue	c125647_f21p15
blue	c125710_f8p15
blue	c125754_f1p4
blue	c125755_f4p8
blue	c125790_f4p6
blue	c125823_f3p7
blue	c125897_f3p6
blue	c125903_f4p14
blue	c125930_f3p0
blue	c125982_f3p7
blue	c126020_f2p1
blue	c126043_f2p6
blue	c126047_f3p7
blue	c126050_f2p15
blue	c126059_f2p2
blue	c126063_f3p8
blue	c126083_f2p2
blue	c126086_f2p1
blue	c126096_f2p4
blue	c126101_f2p0
blue	c126120_f2p0
blue	c126150_f2p0
blue	c126209_f2p3
blue	c126219_f4p2
blue	c126229_f2p0
blue	c126253_f2p3
blue	c126262_f3p0
blue	c126318_f2p4
blue	c126366_f2p8
blue	c126374_f3p7
blue	c126377_f2p3
blue	c126388_f3p8
blue	c1263_f3p0
blue	c126409_f2p1
blue	c126424_f2p2
blue	c126430_f2p1
blue	c126474_f2p1
blue	c126491_f2p1
blue	c126505_f4p7
blue	c126587_f2p3
blue	c12660_f11p2
blue	c126627_f1p0
blue	c126692_f1p2
blue	c126729_f1p1
blue	c126827_f1p0
blue	c126835_f1p0
blue	c126955_f1p5
blue	c126957_f2p1
blue	c126980_f1p6
blue	c126988_f1p0
blue	c12722_f1p0
blue	c127287_f1p0
blue	c127297_f1p1
blue	c127323_f1p3
blue	c127427_f2p3
blue	c127472_f1p3
blue	c127530_f1p2
blue	c127606_f1p4
blue	c127630_f1p0
blue	c127696_f1p6
blue	c12778_f2p0
blue	c127797_f1p4
blue	c127879_f1p10
blue	c1278_f3p7
blue	c12792_f1p0
blue	c127935_f1p2
blue	c127950_f1p5
blue	c128002_f2p4
blue	c128063_f1p3
blue	c128161_f1p1
blue	c128175_f1p1
blue	c12826_f2p1
blue	c128312_f2p2
blue	c128391_f1p5
blue	c128491_f2p3
blue	c128585_f1p4
blue	c128665_f1p3
blue	c128743_f2p6
blue	c1287_f3p1
blue	c128951_f1p0
blue	c128953_f1p3
blue	c128955_f1p4
blue	c128970_f1p1
blue	c129002_f1p0
blue	c129050_f1p1
blue	c129062_f4p4
blue	c129095_f1p0
blue	c129185_f1p2
blue	c129208_f1p0
blue	c12930_f2p1
blue	c129364_f1p4
blue	c129367_f1p8
blue	c129384_f1p0
blue	c129459_f1p0
blue	c129551_f1p0
blue	c129573_f1p1
blue	c12962_f1p11
blue	c129668_f3p0
blue	c129777_f1p0
blue	c129838_f1p2
blue	c129865_f1p5
blue	c129885_f1p0
blue	c129920_f1p2
blue	c129926_f1p0
blue	c129972_f1p1
blue	c129978_f1p7
blue	c129998_f1p1
blue	c129999_f1p1
blue	c130013_f1p2
blue	c130069_f1p12
blue	c130183_f1p47
blue	c130188_f1p18
blue	c130310_f1p1
blue	c130416_f1p11
blue	c130419_f1p1
blue	c130434_f1p8
blue	c130448_f1p2
blue	c130585_f1p4
blue	c130611_f1p4
blue	c130612_f1p0
blue	c130618_f1p0
blue	c130644_f1p1
blue	c130649_f1p1
blue	c130681_f1p4
blue	c130683_f1p0
blue	c130714_f1p1
blue	c130787_f2p1
blue	c130822_f3p8
blue	c130904_f1p3
blue	c130913_f1p2
blue	c130929_f1p2
blue	c130961_f1p5
blue	c130984_f1p0
blue	c130999_f1p1
blue	c131009_f1p2
blue	c131032_f1p0
blue	c131091_f1p2
blue	c131107_f1p3
blue	c13111_f2p0
blue	c131120_f1p0
blue	c131190_f1p1
blue	c131194_f1p1
blue	c131314_f1p1
blue	c131366_f1p0
blue	c131419_f1p0
blue	c131444_f1p2
blue	c131447_f3p4
blue	c131533_f1p1
blue	c131560_f1p2
blue	c131592_f1p1
blue	c131763_f1p0
blue	c131989_f1p2
blue	c132083_f1p0
blue	c132148_f1p11
blue	c132157_f1p2
blue	c132172_f1p4
blue	c132202_f1p1
blue	c132324_f1p2
blue	c132328_f1p2
blue	c132358_f1p0
blue	c132371_f1p5
blue	c132380_f1p1
blue	c132452_f1p0
blue	c132522_f1p2
blue	c132555_f1p0
blue	c132566_f1p6
blue	c132607_f2p0
blue	c132685_f1p4
blue	c132741_f1p0
blue	c132861_f1p1
blue	c132908_f1p2
blue	c132913_f1p1
blue	c133020_f1p3
blue	c133026_f1p2
blue	c133146_f1p0
blue	c133154_f1p1
blue	c133187_f1p4
blue	c133271_f1p11
blue	c133304_f1p9
blue	c133342_f1p4
blue	c133344_f1p1
blue	c133376_f1p9
blue	c133403_f1p3
blue	c133512_f1p2
blue	c133523_f1p3
blue	c133615_f1p7
blue	c133631_f1p0
blue	c133659_f2p10
blue	c133670_f1p1
blue	c133731_f1p0
blue	c133788_f1p1
blue	c133791_f1p2
blue	c133800_f1p1
blue	c133894_f1p6
blue	c133980_f2p3
blue	c134065_f2p3
blue	c134068_f2p1
blue	c134224_f1p0
blue	c134347_f1p1
blue	c134493_f2p4
blue	c134541_f1p3
blue	c134582_f1p1
blue	c134668_f1p0
blue	c134713_f2p4
blue	c134877_f1p8
blue	c134944_f1p0
blue	c134964_f1p2
blue	c134967_f1p0
blue	c135027_f1p0
blue	c135080_f1p0
blue	c135160_f1p4
blue	c135209_f1p3
blue	c135273_f2p1
blue	c135282_f1p2
blue	c135498_f1p3
blue	c135503_f1p2
blue	c135530_f1p4
blue	c135597_f1p2
blue	c135690_f2p12
blue	c135792_f1p0
blue	c135817_f1p12
blue	c135958_f1p25
blue	c136113_f1p1
blue	c136185_f1p0
blue	c136199_f1p5
blue	c136226_f1p4
blue	c136227_f1p0
blue	c136309_f1p3
blue	c136329_f1p0
blue	c136434_f1p0
blue	c136519_f1p1
blue	c136570_f1p1
blue	c136574_f1p0
blue	c136611_f1p0
blue	c136665_f1p2
blue	c136692_f1p0
blue	c136743_f1p0
blue	c136971_f1p1
blue	c137065_f1p2
blue	c137084_f1p5
blue	c137127_f1p0
blue	c137132_f1p1
blue	c137138_f1p2
blue	c137190_f1p2
blue	c137220_f1p22
blue	c137232_f1p1
blue	c137352_f1p1
blue	c137386_f1p0
blue	c137498_f1p7
blue	c137579_f1p0
blue	c137693_f1p3
blue	c137696_f1p0
blue	c137701_f1p0
blue	c137783_f1p14
blue	c137791_f1p1
blue	c137794_f1p7
blue	c137799_f1p0
blue	c137916_f2p4
blue	c138046_f1p0
blue	c138066_f1p4
blue	c138099_f1p1
blue	c138135_f1p0
blue	c138238_f1p46
blue	c138245_f1p5
blue	c138369_f1p1
blue	c138395_f1p2
blue	c138445_f1p0
blue	c138523_f1p0
blue	c138542_f1p6
blue	c138783_f3p1
blue	c138857_f1p10
blue	c138925_f1p11
blue	c138987_f1p1
blue	c139012_f1p4
blue	c139023_f1p1
blue	c139034_f1p0
blue	c139088_f1p2
blue	c139098_f1p2
blue	c139109_f1p1
blue	c139167_f1p0
blue	c139219_f1p0
blue	c139265_f1p5
blue	c139291_f1p10
blue	c139382_f3p2
blue	c139510_f1p4
blue	c139578_f1p1
blue	c139679_f1p2
blue	c1396_f3p1
blue	c139824_f1p0
blue	c139861_f3p2
blue	c140014_f2p0
blue	c140064_f1p1
blue	c140251_f1p7
blue	c140319_f1p0
blue	c140344_f1p0
blue	c140454_f1p11
blue	c140492_f1p1
blue	c140594_f16p8
blue	c140623_f1p1
blue	c140652_f1p0
blue	c140723_f1p1
blue	c140724_f1p0
blue	c140790_f1p0
blue	c140808_f1p4
blue	c141484_f1p16
blue	c142283_f3p6
blue	c142397_f2p1
blue	c142626_f2p2
blue	c143094_f2p3
blue	c143104_f2p5
blue	c143872_f1p3
blue	c1448_f3p1
blue	c145031_f1p2
blue	c145134_f2p4
blue	c145883_f2p13
blue	c146725_f3p4
blue	c1468_f3p0
blue	c146952_f2p3
blue	c148813_f4p0
blue	c148852_f2p1
blue	c152496_f10p0
blue	c152536_f3p5
blue	c156143_f13p12
blue	c156160_f1p1
blue	c159819_f47p14
blue	c159832_f1p2
blue	c159957_f2p3
blue	c159974_f37p52
blue	c160039_f10p7
blue	c160191_f5p1
blue	c160245_f8p11
blue	c160293_f3p1
blue	c160309_f56p26
blue	c160519_f3p8
blue	c160536_f3p3
blue	c160561_f2p3
blue	c160596_f2p0
blue	c160608_f2p4
blue	c160612_f2p0
blue	c160613_f2p1
blue	c160686_f2p1
blue	c160706_f2p1
blue	c160798_f1p3
blue	c160929_f1p1
blue	c161007_f1p0
blue	c161087_f1p1
blue	c161151_f1p1
blue	c161215_f1p4
blue	c161222_f1p5
blue	c161230_f1p0
blue	c161289_f1p5
blue	c161440_f1p4
blue	c161521_f1p0
blue	c161546_f1p0
blue	c161743_f1p2
blue	c161805_f1p0
blue	c161809_f1p21
blue	c161813_f1p0
blue	c161854_f1p0
blue	c161893_f1p3
blue	c161971_f1p2
blue	c162025_f1p7
blue	c162051_f1p1
blue	c162104_f1p0
blue	c162199_f1p2
blue	c162231_f1p0
blue	c162244_f1p1
blue	c162313_f1p0
blue	c162337_f1p1
blue	c162358_f1p3
blue	c162480_f1p4
blue	c162555_f1p7
blue	c162638_f1p2
blue	c162643_f1p1
blue	c162671_f1p1
blue	c162686_f1p2
blue	c162797_f1p0
blue	c162806_f1p0
blue	c162834_f2p1
blue	c162862_f1p3
blue	c162905_f1p17
blue	c162972_f2p6
blue	c162998_f1p1
blue	c163011_f1p2
blue	c163220_f1p0
blue	c163272_f1p1
blue	c163300_f1p0
blue	c163301_f1p1
blue	c163304_f1p0
blue	c163446_f1p4
blue	c163490_f1p0
blue	c163607_f1p1
blue	c163760_f1p1
blue	c163762_f1p3
blue	c163784_f1p0
blue	c163845_f1p2
blue	c163912_f1p12
blue	c164212_f18p5
blue	c164272_f1p1
blue	c164376_f1p2
blue	c164540_f1p1
blue	c164590_f1p4
blue	c164599_f1p1
blue	c164661_f2p1
blue	c164718_f1p1
blue	c164757_f1p11
blue	c164777_f1p9
blue	c164828_f1p1
blue	c164976_f1p0
blue	c165039_f1p4
blue	c165088_f1p1
blue	c165125_f1p11
blue	c1651_f2p2
blue	c165226_f1p4
blue	c165254_f1p3
blue	c165260_f1p0
blue	c165285_f1p0
blue	c165381_f1p0
blue	c165538_f1p2
blue	c165549_f1p0
blue	c165612_f1p5
blue	c165738_f1p1
blue	c165785_f1p2
blue	c165868_f1p0
blue	c166307_f1p2
blue	c166384_f1p0
blue	c166404_f1p4
blue	c16640_f3p0
blue	c166558_f1p0
blue	c166694_f1p1
blue	c166822_f1p1
blue	c166829_f1p1
blue	c166972_f1p0
blue	c167245_f1p0
blue	c167306_f1p1
blue	c167481_f1p3
blue	c167620_f1p9
blue	c167632_f1p1
blue	c167640_f1p0
blue	c1677_f2p3
blue	c167990_f1p0
blue	c168104_f1p0
blue	c168132_f1p6
blue	c168156_f1p1
blue	c168310_f1p0
blue	c168329_f1p4
blue	c168371_f1p4
blue	c168377_f1p0
blue	c168410_f1p1
blue	c168499_f1p1
blue	c168559_f1p2
blue	c168608_f1p0
blue	c168636_f1p2
blue	c1686_f8p3
blue	c168922_f1p2
blue	c168941_f1p1
blue	c169246_f1p482
blue	c169364_f1p4
blue	c169523_f1p4
blue	c169644_f1p1
blue	c169666_f2p3
blue	c169726_f2p9
blue	c169848_f1p6
blue	c169992_f4p6
blue	c170032_f15p31
blue	c170050_f2p11
blue	c170086_f2p1
blue	c1703_f3p2
blue	c1706_f27p7
blue	c170901_f2p1
blue	c171793_f1p4
blue	c171917_f2p1
blue	c1726_f2p1
blue	c172811_f1p2
blue	c173634_f4p17
blue	c173758_f4p2
blue	c173893_f1p1
blue	c173982_f5p4
blue	c1741_f2p0
blue	c174620_f7p8
blue	c1748_f3p2
blue	c177508_f6p5
blue	c177656_f6p11
blue	c178255_f7p10
blue	c1783_f2p0
blue	c179001_f2p5
blue	c1800_f4p3
blue	c1802_f2p4
blue	c180503_f1p1
blue	c1811_f2p0
blue	c184037_f15p7
blue	c184979_f1p2
blue	c185002_f8p10
blue	c185017_f16p17
blue	c185089_f1p1
blue	c185870_f6p1
blue	c1859_f2p2
blue	c187060_f4p1
blue	c1883_f3p4
blue	c188716_f2p4
blue	c188717_f7p5
blue	c188763_f107p43
blue	c188770_f7p3
blue	c188772_f6p6
blue	c188783_f39p25
blue	c188785_f27p5
blue	c188789_f2p6
blue	c188844_f74p18
blue	c188888_f1p1
blue	c188925_f4p2
blue	c188929_f3p1
blue	c188939_f4p1
blue	c188951_f3p6
blue	c188954_f1p2
blue	c188956_f8p11
blue	c188957_f13p4
blue	c188972_f1p15
blue	c188983_f9p10
blue	c1889_f2p0
blue	c189017_f14p10
blue	c189104_f2p0
blue	c189219_f5p6
blue	c189245_f7p4
blue	c189259_f2p4
blue	c189303_f10p9
blue	c189309_f1p4
blue	c189314_f23p15
blue	c189330_f13p0
blue	c189336_f3p4
blue	c189341_f10p9
blue	c189358_f4p0
blue	c189362_f1p5
blue	c189500_f2p1
blue	c189736_f2p1
blue	c190125_f1p3
blue	c190157_f19p9
blue	c190189_f3p4
blue	c190926_f5p5
blue	c1909_f3p0
blue	c191005_f2p13
blue	c191023_f2p34
blue	c191149_f5p11
blue	c1914_f2p1
blue	c191757_f3p4
blue	c1918_f2p1
blue	c192150_f3p0
blue	c192444_f7p4
blue	c192841_f13p5
blue	c192931_f5p5
blue	c193234_f5p3
blue	c193272_f8p2
blue	c19649_f7p2
blue	c197590_f9p13
blue	c1987_f2p2
blue	c199049_f5p7
blue	c199373_f4p2
blue	c200014_f2p1
blue	c200427_f27p10
blue	c200442_f9p0
blue	c201453_f3p3
blue	c2034_f2p0
blue	c204063_f4p6
blue	c204190_f1p0
blue	c204207_f1p0
blue	c204276_f1p1
blue	c204277_f1p0
blue	c204352_f1p0
blue	c204374_f1p1
blue	c204575_f1p2
blue	c204593_f1p1
blue	c204892_f1p6
blue	c204986_f1p0
blue	c205142_f1p5
blue	c205216_f1p1
blue	c205303_f1p0
blue	c205310_f1p5
blue	c205330_f1p2
blue	c205476_f1p1
blue	c205553_f1p1
blue	c205595_f1p1
blue	c205883_f1p4
blue	c205905_f1p8
blue	c205928_f1p0
blue	c205934_f1p1
blue	c205986_f1p0
blue	c205989_f1p1
blue	c206154_f1p0
blue	c206181_f1p1
blue	c206196_f1p1
blue	c206235_f1p1
blue	c206316_f1p1
blue	c206317_f1p0
blue	c206335_f1p2
blue	c206340_f1p1
blue	c206506_f1p2
blue	c206563_f1p1
blue	c206632_f1p3
blue	c206690_f1p0
blue	c206836_f1p3
blue	c206997_f1p0
blue	c207000_f1p0
blue	c207001_f1p0
blue	c207012_f1p0
blue	c207020_f1p5
blue	c207080_f1p1
blue	c207126_f1p0
blue	c207151_f1p3
blue	c207165_f1p2
blue	c207185_f1p0
blue	c207261_f1p0
blue	c207318_f1p0
blue	c2073_f2p1
blue	c207470_f1p1
blue	c207484_f1p1
blue	c207509_f1p1
blue	c207610_f1p0
blue	c2085_f2p1
blue	c2088_f11p3
blue	c2105_f5p0
blue	c2131_f2p1
blue	c2138_f2p0
blue	c2148_f2p1
blue	c2164_f2p0
blue	c2167_f2p2
blue	c2170_f2p2
blue	c2183_f2p0
blue	c2218_f2p6
blue	c2295_f1p3
blue	c2312_f1p2
blue	c2325_f1p0
blue	c23960_f3p2
blue	c2584_f1p0
blue	c26873_f10p8
blue	c27016_f54p24
blue	c27037_f1p1
blue	c27113_f63p26
blue	c27115_f39p12
blue	c27155_f7p3
blue	c27300_f12p8
blue	c27301_f25p5
blue	c27321_f13p0
blue	c27339_f10p12
blue	c27408_f13p4
blue	c27419_f4p2
blue	c274_f9p24
blue	c27500_f5p2
blue	c27506_f9p2
blue	c27542_f20p5
blue	c27547_f9p7
blue	c2754_f1p0
blue	c27565_f8p7
blue	c27575_f4p4
blue	c27583_f4p7
blue	c27595_f4p3
blue	c27636_f8p5
blue	c27637_f8p4
blue	c27647_f6p3
blue	c27657_f5p4
blue	c27663_f6p0
blue	c27670_f5p5
blue	c27699_f12p5
blue	c27759_f11p9
blue	c27775_f9p3
blue	c27797_f6p5
blue	c27821_f6p8
blue	c27824_f5p3
blue	c27850_f9p8
blue	c27858_f8p6
blue	c27915_f3p4
blue	c27931_f3p1
blue	c27944_f6p2
blue	c27973_f14p4
blue	c27976_f2p2
blue	c27988_f2p0
blue	c28023_f5p6
blue	c28025_f4p5
blue	c28090_f3p0
blue	c28093_f5p4
blue	c28115_f8p0
blue	c28160_f3p3
blue	c28171_f3p2
blue	c28172_f3p1
blue	c28267_f2p1
blue	c28291_f2p1
blue	c28306_f3p2
blue	c28355_f2p1
blue	c28365_f8p4
blue	c28374_f14p5
blue	c28418_f2p2
blue	c28438_f8p3
blue	c28457_f6p0
blue	c28458_f4p1
blue	c28469_f8p2
blue	c28510_f4p0
blue	c28515_f9p3
blue	c28563_f3p6
blue	c28575_f4p3
blue	c28576_f3p1
blue	c28578_f8p7
blue	c28579_f5p2
blue	c28580_f3p4
blue	c28657_f5p0
blue	c28659_f5p2
blue	c28662_f4p4
blue	c28685_f9p3
blue	c28695_f4p0
blue	c28705_f3p1
blue	c28729_f8p3
blue	c28730_f2p9
blue	c28752_f6p2
blue	c28768_f10p6
blue	c28836_f1p2
blue	c28927_f1p0
blue	c28960_f1p0
blue	c29099_f4p4
blue	c29218_f1p0
blue	c29257_f3p1
blue	c29258_f2p4
blue	c29302_f1p0
blue	c29314_f2p1
blue	c2933_f1p1
blue	c29386_f1p0
blue	c29412_f1p0
blue	c29456_f1p1
blue	c29486_f1p0
blue	c29534_f5p5
blue	c29570_f1p1
blue	c29584_f2p3
blue	c29632_f2p0
blue	c29641_f1p2
blue	c29706_f1p3
blue	c29708_f1p0
blue	c29743_f2p3
blue	c29879_f1p0
blue	c30011_f3p0
blue	c30017_f2p2
blue	c30073_f3p1
blue	c30130_f2p1
blue	c30163_f9p2
blue	c30190_f1p0
blue	c30203_f3p1
blue	c30206_f1p0
blue	c30243_f1p11
blue	c30249_f1p1
blue	c30257_f2p3
blue	c30393_f3p6
blue	c30404_f2p0
blue	c30510_f9p1
blue	c30525_f1p1
blue	c30598_f1p6
blue	c30738_f2p0
blue	c30806_f2p3
blue	c30823_f3p2
blue	c30835_f1p1
blue	c30947_f6p4
blue	c30970_f7p0
blue	c31012_f1p2
blue	c31040_f1p0
blue	c31053_f1p1
blue	c31077_f2p1
blue	c31090_f3p6
blue	c31097_f4p1
blue	c31167_f7p7
blue	c31265_f1p3
blue	c31278_f2p2
blue	c31378_f1p3
blue	c31394_f2p0
blue	c31415_f2p2
blue	c31533_f1p2
blue	c31608_f3p1
blue	c3160_f4p4
blue	c31668_f1p1
blue	c31676_f1p1
blue	c31682_f3p4
blue	c31729_f1p1
blue	c31747_f3p5
blue	c31754_f2p4
blue	c31792_f2p9
blue	c31867_f1p0
blue	c31960_f5p3
blue	c32010_f1p4
blue	c32055_f1p3
blue	c32056_f1p4
blue	c32060_f2p0
blue	c32122_f1p0
blue	c32154_f1p5
blue	c32172_f1p1
blue	c32320_f1p0
blue	c32344_f1p5
blue	c32357_f2p1
blue	c32382_f1p4
blue	c32626_f1p17
blue	c32655_f1p1
blue	c32665_f1p0
blue	c32713_f4p3
blue	c32816_f1p3
blue	c3281_f1p0
blue	c32834_f1p2
blue	c32849_f3p5
blue	c32876_f1p0
blue	c32931_f2p3
blue	c32938_f2p1
blue	c33012_f1p1
blue	c33014_f1p0
blue	c33092_f4p8
blue	c33125_f1p0
blue	c33129_f2p2
blue	c33137_f1p0
blue	c33211_f3p1
blue	c33254_f2p5
blue	c33267_f1p0
blue	c33291_f2p2
blue	c33370_f1p1
blue	c33381_f1p0
blue	c33385_f3p1
blue	c333_f14p15
blue	c33532_f2p0
blue	c33544_f2p0
blue	c33545_f2p0
blue	c33567_f1p1
blue	c33574_f1p0
blue	c33577_f6p4
blue	c33578_f1p1
blue	c33602_f1p0
blue	c33604_f1p0
blue	c3361_f1p2
blue	c33639_f1p0
blue	c33653_f1p3
blue	c33659_f1p5
blue	c33805_f1p0
blue	c33853_f3p0
blue	c33869_f1p0
blue	c33965_f1p0
blue	c34009_f3p7
blue	c34018_f4p2
blue	c34088_f2p3
blue	c34221_f1p2
blue	c34242_f2p4
blue	c34256_f1p1
blue	c34270_f2p1
blue	c34275_f1p1
blue	c34314_f1p0
blue	c34458_f1p0
blue	c34474_f1p1
blue	c34526_f2p4
blue	c3457_f2p1
blue	c34676_f1p3
blue	c34707_f4p7
blue	c34721_f1p0
blue	c34728_f4p4
blue	c34750_f1p0
blue	c34752_f1p11
blue	c34840_f2p1
blue	c34895_f1p7
blue	c34910_f1p2
blue	c34955_f3p1
blue	c35032_f2p8
blue	c35053_f1p0
blue	c35073_f2p0
blue	c35082_f1p1
blue	c35083_f1p0
blue	c35120_f2p1
blue	c35128_f1p4
blue	c35220_f4p2
blue	c35284_f20p21
blue	c35335_f1p0
blue	c35342_f2p3
blue	c35351_f7p3
blue	c35385_f1p2
blue	c35387_f1p1
blue	c35412_f1p5
blue	c35413_f1p1
blue	c35449_f8p6
blue	c35517_f4p5
blue	c35518_f1p3
blue	c35522_f3p2
blue	c35615_f1p0
blue	c3564_f2p1
blue	c35658_f2p2
blue	c35689_f1p2
blue	c35748_f3p7
blue	c35811_f4p1
blue	c35872_f1p0
blue	c35932_f2p1
blue	c36009_f1p1
blue	c36026_f3p0
blue	c36121_f2p0
blue	c36154_f1p2
blue	c36157_f1p1
blue	c36170_f4p3
blue	c36195_f1p0
blue	c36274_f1p0
blue	c36292_f1p1
blue	c36402_f1p0
blue	c36449_f5p0
blue	c36514_f1p0
blue	c36568_f2p0
blue	c36571_f1p0
blue	c36685_f1p0
blue	c36735_f1p3
blue	c36738_f1p1
blue	c36810_f1p1
blue	c36899_f1p1
blue	c36920_f1p10
blue	c3718_f1p2
blue	c37206_f1p1
blue	c37220_f5p0
blue	c37226_f1p2
blue	c37281_f1p1
blue	c3730_f5p2
blue	c37453_f1p4
blue	c37495_f2p0
blue	c37573_f1p1
blue	c37577_f2p0
blue	c37582_f1p0
blue	c37630_f1p0
blue	c37689_f2p2
blue	c37718_f2p1
blue	c37737_f1p0
blue	c37789_f2p1
blue	c3780_f6p1
blue	c37811_f18p15
blue	c37854_f2p3
blue	c37905_f2p3
blue	c37961_f7p2
blue	c38002_f1p2
blue	c38081_f1p0
blue	c3809_f2p0
blue	c38197_f1p1
blue	c38198_f1p2
blue	c38221_f1p1
blue	c38241_f1p7
blue	c3831_f2p0
blue	c38331_f1p4
blue	c3833_f2p0
blue	c383_f32p8
blue	c38420_f3p2
blue	c38435_f1p1
blue	c38538_f1p2
blue	c38554_f2p3
blue	c38564_f1p1
blue	c38640_f3p3
blue	c38692_f1p4
blue	c38694_f1p3
blue	c38767_f1p1
blue	c38851_f7p23
blue	c3886_f1p0
blue	c39019_f1p1
blue	c39072_f1p1
blue	c39089_f2p0
blue	c39122_f1p2
blue	c39169_f6p1
blue	c39232_f1p0
blue	c39260_f3p1
blue	c39282_f1p0
blue	c39330_f1p4
blue	c39343_f3p1
blue	c39361_f2p0
blue	c39409_f5p0
blue	c39495_f2p3
blue	c39507_f2p3
blue	c39622_f2p5
blue	c39643_f4p3
blue	c39646_f5p1
blue	c39683_f2p5
blue	c39714_f5p2
blue	c39730_f2p0
blue	c39830_f1p1
blue	c39891_f6p10
blue	c39933_f2p0
blue	c39944_f1p0
blue	c39960_f5p1
blue	c40004_f1p2
blue	c40006_f1p3
blue	c40054_f1p1
blue	c40135_f1p0
blue	c40168_f1p0
blue	c40271_f4p0
blue	c40283_f6p4
blue	c40298_f2p3
blue	c40353_f1p0
blue	c40541_f1p0
blue	c40548_f1p0
blue	c40560_f6p6
blue	c40584_f1p5
blue	c40620_f3p3
blue	c40632_f1p0
blue	c40677_f3p1
blue	c40701_f1p1
blue	c40710_f2p7
blue	c40731_f2p5
blue	c41079_f1p3
blue	c41152_f1p4
blue	c41158_f3p3
blue	c41163_f1p1
blue	c41173_f1p1
blue	c41211_f4p1
blue	c41239_f1p0
blue	c41243_f1p1
blue	c41299_f1p11
blue	c41306_f1p0
blue	c41323_f1p3
blue	c41371_f3p1
blue	c41378_f1p0
blue	c41477_f1p3
blue	c41620_f1p2
blue	c4170_f1p0
blue	c41777_f1p2
blue	c41841_f1p2
blue	c41890_f1p1
blue	c41911_f3p7
blue	c41922_f3p7
blue	c42005_f1p1
blue	c42027_f4p3
blue	c42056_f1p2
blue	c42369_f1p0
blue	c42570_f2p2
blue	c42587_f1p1
blue	c42588_f1p0
blue	c42656_f3p1
blue	c42670_f1p0
blue	c4273_f2p1
blue	c42742_f1p2
blue	c42821_f4p3
blue	c428_f27p9
blue	c4347_f1p7
blue	c4398_f1p0
blue	c4408_f1p0
blue	c4434_f1p0
blue	c448_f5p10
blue	c4511_f1p0
blue	c452_f24p10
blue	c4591_f1p0
blue	c46374_f7p13
blue	c46384_f13p13
blue	c467_f20p4
blue	c4750_f1p1
blue	c4825_f1p0
blue	c48742_f2p0
blue	c4939_f1p0
blue	c4942_f1p0
blue	c49903_f4p3
blue	c5059_f1p2
blue	c506_f17p6
blue	c5189_f1p0
blue	c5209_f1p2
blue	c5229_f1p0
blue	c5339_f2p0
blue	c5359_f6p14
blue	c5408_f3p2
blue	c54221_f3p5
blue	c5485_f1p0
blue	c550_f15p6
blue	c5515_f1p0
blue	c556_f4p9
blue	c5652_f1p0
blue	c568_f11p4
blue	c5700_f1p0
blue	c5837_f1p0
blue	c5867_f1p0
blue	c58925_f3p3
blue	c5956_f1p0
blue	c5972_f1p3
blue	c6005_f1p0
blue	c60354_f42p36
blue	c60360_f60p24
blue	c6040_f1p1
blue	c60433_f25p23
blue	c60434_f21p9
blue	c60471_f5p17
blue	c60478_f53p10
blue	c60578_f4p3
blue	c60584_f8p2
blue	c60594_f3p2
blue	c60599_f5p4
blue	c60626_f3p2
blue	c60640_f5p13
blue	c60669_f4p0
blue	c60714_f7p8
blue	c60718_f3p2
blue	c60726_f5p7
blue	c60749_f3p2
blue	c60754_f3p3
blue	c60770_f3p1
blue	c60775_f3p11
blue	c60809_f2p0
blue	c60852_f2p1
blue	c60874_f6p0
blue	c60880_f2p1
blue	c60899_f2p1
blue	c60932_f3p3
blue	c60960_f2p5
blue	c60974_f2p0
blue	c60978_f2p5
blue	c60984_f3p0
blue	c60994_f2p8
blue	c61002_f4p3
blue	c61012_f2p1
blue	c61103_f2p4
blue	c61107_f2p2
blue	c61159_f2p0
blue	c61185_f2p1
blue	c6118_f1p18
blue	c61233_f4p2
blue	c61236_f2p1
blue	c61238_f4p6
blue	c61265_f5p1
blue	c61271_f4p0
blue	c61291_f2p2
blue	c61320_f7p1
blue	c61373_f2p0
blue	c61401_f3p2
blue	c61426_f2p1
blue	c61430_f7p2
blue	c61567_f1p0
blue	c61568_f1p1
blue	c61598_f1p0
blue	c61675_f5p3
blue	c6178_f1p2
blue	c61800_f2p1
blue	c61868_f2p3
blue	c61881_f2p1
blue	c61924_f1p4
blue	c61937_f2p2
blue	c61949_f1p2
blue	c6203_f1p0
blue	c62114_f1p1
blue	c62151_f1p1
blue	c62173_f2p1
blue	c62216_f2p3
blue	c62350_f2p2
blue	c62369_f2p2
blue	c62393_f1p1
blue	c623_f15p3
blue	c62440_f2p6
blue	c62516_f1p4
blue	c62550_f2p0
blue	c62587_f3p3
blue	c62591_f1p1
blue	c62599_f3p4
blue	c62824_f2p3
blue	c62834_f2p1
blue	c62886_f1p8
blue	c62891_f3p4
blue	c63003_f1p0
blue	c63012_f1p2
blue	c63212_f1p0
blue	c63214_f1p2
blue	c63217_f1p0
blue	c63225_f2p2
blue	c63276_f1p1
blue	c63281_f1p4
blue	c63405_f1p1
blue	c63427_f1p0
blue	c63448_f1p3
blue	c63456_f1p1
blue	c63491_f1p2
blue	c63545_f1p1
blue	c63680_f1p0
blue	c63696_f1p1
blue	c63717_f1p6
blue	c63733_f1p10
blue	c63786_f2p0
blue	c63795_f2p0
blue	c63803_f1p1
blue	c64005_f1p2
blue	c64105_f1p0
blue	c64138_f1p0
blue	c64142_f1p1
blue	c64162_f1p2
blue	c64189_f1p0
blue	c64190_f1p2
blue	c64237_f1p3
blue	c64260_f2p1
blue	c64334_f1p0
blue	c64355_f1p0
blue	c64371_f2p4
blue	c64412_f2p3
blue	c64483_f3p2
blue	c64590_f1p3
blue	c64600_f2p3
blue	c64604_f1p0
blue	c64629_f1p0
blue	c64704_f1p1
blue	c64742_f1p2
blue	c64765_f1p1
blue	c64770_f2p1
blue	c64810_f1p0
blue	c64820_f1p0
blue	c64868_f1p4
blue	c64885_f1p0
blue	c65085_f1p0
blue	c65097_f1p2
blue	c65129_f1p4
blue	c65356_f1p1
blue	c65368_f4p0
blue	c65403_f1p1
blue	c65554_f1p2
blue	c65729_f1p1
blue	c65750_f1p1
blue	c65779_f2p3
blue	c65786_f1p0
blue	c65849_f1p0
blue	c65858_f1p0
blue	c65905_f1p1
blue	c65914_f2p6
blue	c66026_f1p3
blue	c66090_f1p0
blue	c66106_f1p0
blue	c66130_f2p0
blue	c66136_f1p0
blue	c66139_f3p16
blue	c66183_f1p1
blue	c66195_f1p0
blue	c66238_f1p0
blue	c66298_f2p0
blue	c66335_f1p1
blue	c66377_f1p1
blue	c66408_f1p0
blue	c66430_f1p0
blue	c66499_f1p1
blue	c66512_f1p0
blue	c66526_f1p0
blue	c66551_f1p2
blue	c66566_f1p5
blue	c66573_f1p0
blue	c66615_f1p1
blue	c66701_f1p0
blue	c66740_f1p0
blue	c66841_f4p1
blue	c66848_f1p1
blue	c66865_f1p0
blue	c66876_f1p0
blue	c66942_f1p12
blue	c66943_f2p1
blue	c66967_f1p0
blue	c66987_f1p2
blue	c67021_f1p1
blue	c67023_f1p2
blue	c67088_f2p1
blue	c67097_f1p1
blue	c67129_f2p2
blue	c67181_f2p0
blue	c67288_f1p0
blue	c67301_f1p1
blue	c6732_f1p20
blue	c67364_f1p6
blue	c67408_f1p4
blue	c67539_f1p22
blue	c67544_f1p6
blue	c67626_f1p1
blue	c67867_f1p4
blue	c67882_f1p1
blue	c67890_f1p0
blue	c67919_f1p1
blue	c68027_f1p28
blue	c68088_f1p0
blue	c68091_f1p3
blue	c68133_f1p1
blue	c68151_f2p5
blue	c68171_f2p0
blue	c68176_f1p0
blue	c68324_f1p0
blue	c68357_f7p1
blue	c68371_f1p1
blue	c68374_f1p1
blue	c68448_f1p1
blue	c68542_f1p0
blue	c68552_f2p0
blue	c68616_f2p0
blue	c68620_f2p3
blue	c68624_f3p8
blue	c68647_f1p0
blue	c68720_f1p2
blue	c68727_f2p2
blue	c68812_f1p2
blue	c68926_f1p2
blue	c68933_f2p2
blue	c68955_f2p5
blue	c6900_f1p1
blue	c69016_f2p1
blue	c69033_f2p1
blue	c69035_f1p2
blue	c69154_f2p0
blue	c69158_f1p1
blue	c69204_f1p0
blue	c69298_f1p1
blue	c69397_f1p0
blue	c69404_f2p2
blue	c69481_f1p1
blue	c69552_f1p5
blue	c69598_f1p0
blue	c69611_f2p3
blue	c69774_f1p0
blue	c69803_f1p0
blue	c69818_f1p2
blue	c69850_f1p4
blue	c69880_f3p1
blue	c69985_f1p3
blue	c70006_f1p3
blue	c70103_f1p0
blue	c70116_f1p1
blue	c70161_f3p1
blue	c70204_f2p2
blue	c70205_f1p0
blue	c70308_f3p1
blue	c70313_f1p0
blue	c70316_f2p2
blue	c70335_f2p1
blue	c7033_f1p0
blue	c7037_f1p0
blue	c70399_f1p1
blue	c70450_f3p1
blue	c70489_f1p0
blue	c70513_f1p0
blue	c70519_f1p1
blue	c70709_f1p0
blue	c70727_f1p0
blue	c70766_f1p0
blue	c70786_f2p1
blue	c70833_f1p4
blue	c70843_f1p2
blue	c71010_f1p1
blue	c71039_f1p0
blue	c71294_f1p1
blue	c71327_f1p0
blue	c71366_f2p1
blue	c71377_f1p0
blue	c71380_f1p1
blue	c71489_f1p1
blue	c71627_f1p6
blue	c71649_f2p2
blue	c71684_f1p0
blue	c71720_f1p2
blue	c71818_f2p0
blue	c71890_f1p5
blue	c71901_f1p0
blue	c71904_f2p2
blue	c71925_f1p2
blue	c71958_f2p2
blue	c72056_f1p0
blue	c72218_f1p1
blue	c72284_f2p0
blue	c72344_f1p1
blue	c72366_f1p0
blue	c7249_f6p3
blue	c72541_f1p4
blue	c72553_f1p0
blue	c72639_f1p0
blue	c72717_f2p6
blue	c72754_f1p1
blue	c72848_f1p1
blue	c72955_f1p1
blue	c73006_f1p1
blue	c73043_f1p1
blue	c730_f7p1
blue	c73175_f1p2
blue	c73192_f1p1
blue	c73193_f1p0
blue	c73262_f1p0
blue	c73280_f1p2
blue	c73305_f1p2
blue	c73358_f1p2
blue	c73398_f1p1
blue	c73413_f1p2
blue	c73511_f1p0
blue	c73562_f1p1
blue	c73584_f4p20
blue	c73593_f1p1
blue	c73613_f2p1
blue	c73619_f1p0
blue	c73682_f1p1
blue	c73765_f1p4
blue	c73781_f3p2
blue	c74012_f1p0
blue	c74030_f1p4
blue	c74046_f1p5
blue	c74103_f1p11
blue	c74147_f1p2
blue	c74171_f1p4
blue	c7420_f1p0
blue	c74278_f9p4
blue	c74291_f6p1
blue	c74342_f6p5
blue	c7444_f1p0
blue	c7456_f1p0
blue	c7486_f3p2
blue	c7503_f1p0
blue	c75154_f8p6
blue	c755_f17p7
blue	c7628_f1p1
blue	c77035_f2p0
blue	c7786_f1p2
blue	c7920_f1p1
blue	c7955_f4p3
blue	c8144_f2p0
blue	c8156_f3p0
blue	c821_f8p4
blue	c8232_f4p5
blue	c8346_f1p0
blue	c8568_f1p1
blue	c8586_f1p1
blue	c8591_f1p1
blue	c8709_f1p2
blue	c8852_f2p5
blue	c891_f5p7
blue	c9108_f1p1
blue	c9130_f1p0
blue	c920_f5p1
blue	c9225_f1p0
blue	c9241_f1p0
blue	c92443_f13p5
blue	c92449_f11p4
blue	c92459_f3p9
blue	c92503_f75p29
blue	c92515_f54p20
blue	c92602_f27p9
blue	c92707_f43p25
blue	c9274_f1p3
blue	c92760_f8p8
blue	c92772_f9p10
blue	c92894_f14p8
blue	c92922_f3p3
blue	c92927_f6p1
blue	c92945_f5p7
blue	c92983_f5p4
blue	c9298_f1p0
blue	c93031_f3p0
blue	c93044_f1p3
blue	c93087_f4p1
blue	c93101_f2p0
blue	c93134_f4p7
blue	c93139_f2p0
blue	c93161_f3p7
blue	c93183_f5p5
blue	c93195_f7p9
blue	c93218_f2p1
blue	c93221_f2p1
blue	c93223_f2p10
blue	c93273_f2p0
blue	c93343_f6p13
blue	c93347_f2p1
blue	c93366_f2p1
blue	c93373_f3p7
blue	c93382_f2p0
blue	c93417_f2p2
blue	c93423_f5p2
blue	c93434_f1p0
blue	c934_f8p0
blue	c9350_f1p0
blue	c93530_f1p1
blue	c93537_f1p1
blue	c93542_f1p3
blue	c93544_f2p0
blue	c93592_f1p2
blue	c93608_f5p4
blue	c93622_f1p1
blue	c93717_f1p1
blue	c93719_f1p0
blue	c93728_f1p0
blue	c93771_f2p2
blue	c93820_f1p2
blue	c93887_f1p1
blue	c93959_f1p4
blue	c93966_f1p3
blue	c93994_f1p2
blue	c94000_f2p4
blue	c94051_f2p1
blue	c94056_f1p2
blue	c94209_f1p0
blue	c94211_f1p3
blue	c94238_f1p5
blue	c94296_f1p0
blue	c94305_f1p4
blue	c94337_f1p4
blue	c94359_f2p3
blue	c94510_f1p1
blue	c94682_f1p3
blue	c946_f7p2
blue	c94729_f1p3
blue	c94730_f1p0
blue	c94736_f1p1
blue	c94745_f1p2
blue	c94826_f1p0
blue	c94908_f1p0
blue	c94938_f1p1
blue	c94970_f2p7
blue	c94987_f1p7
blue	c95072_f2p0
blue	c95253_f1p0
blue	c95254_f1p2
blue	c9540_f1p0
blue	c9543_f1p0
blue	c95479_f2p0
blue	c95509_f1p1
blue	c95529_f4p4
blue	c95593_f1p2
blue	c95668_f1p0
blue	c95728_f1p1
blue	c95741_f1p3
blue	c95806_f1p0
blue	c95872_f1p2
blue	c95875_f1p3
blue	c9588_f1p0
blue	c9591_f2p0
blue	c95940_f1p1
blue	c95951_f1p4
blue	c95992_f1p1
blue	c96034_f1p0
blue	c96044_f1p2
blue	c96094_f1p2
blue	c96124_f1p0
blue	c96271_f1p0
blue	c96272_f1p2
blue	c96337_f1p3
blue	c96494_f1p8
blue	c96495_f1p0
blue	c96525_f2p3
blue	c96556_f1p2
blue	c96707_f1p0
blue	c96842_f2p0
blue	c96883_f1p0
blue	c9700_f16p7
blue	c97014_f2p1
blue	c97030_f1p0
blue	c97098_f6p1
blue	c97112_f1p1
blue	c97223_f1p0
blue	c97309_f1p1
blue	c9731_f1p0
blue	c97333_f2p4
blue	c97439_f1p1
blue	c97448_f1p5
blue	c974_f3p7
blue	c97570_f1p1
blue	c97571_f1p0
blue	c97577_f1p1
blue	c9767_f1p0
blue	c97817_f1p25
blue	c97850_f1p0
blue	c97876_f1p4
blue	c9796_f2p9
blue	c98117_f1p2
blue	c98123_f1p0
blue	c98184_f1p4
blue	c98214_f1p0
blue	c98219_f1p1
blue	c98292_f1p3
blue	c98340_f1p1
blue	c98346_f12p20
blue	c98414_f1p2
blue	c98429_f1p0
blue	c984_f7p6
blue	c98546_f1p0
blue	c98655_f1p4
blue	c98664_f1p3
blue	c98695_f3p3
blue	c98740_f1p1
blue	c98923_f1p6
blue	c98943_f1p1
blue	c98990_f1p0
blue	c99084_f1p3
blue	c99093_f1p0
blue	c99094_f1p3
blue	c99102_f1p1
blue	c99174_f1p1
blue	c99229_f1p0
blue	c99262_f1p2
blue	c99280_f1p2
blue	c99346_f1p0
blue	c99412_f2p4
blue	c99561_f1p2
blue	c99577_f1p1
blue	c99709_f1p1
blue	c99725_f1p12
blue	c99768_f1p3
blue	c99775_f1p0
blue	c99880_f1p1
blue	c99899_f1p2
blue	c99971_f1p0
blue	c93086_f2p8
blue	c95928_f3p27
brown	c100033_f1p1
brown	c100110_f1p7
brown	c100274_f1p1
brown	c100427_f1p0
brown	c100475_f2p3
brown	c100569_f1p4
brown	c100803_f1p0
brown	c100899_f1p2
brown	c101029_f7p8
brown	c101214_f1p0
brown	c101640_f1p0
brown	c101870_f1p2
brown	c101968_f1p3
brown	c102179_f1p6
brown	c102308_f1p4
brown	c102535_f1p0
brown	c102615_f1p13
brown	c102716_f1p15
brown	c102726_f1p2
brown	c102772_f1p0
brown	c102964_f1p5
brown	c103036_f1p2
brown	c103063_f1p0
brown	c103106_f1p1
brown	c103260_f1p1
brown	c103337_f1p1
brown	c103471_f1p5
brown	c103486_f1p1
brown	c103491_f1p1
brown	c103500_f1p3
brown	c103532_f1p3
brown	c103766_f1p1
brown	c103851_f1p0
brown	c103919_f1p1
brown	c104117_f1p2
brown	c104233_f1p3
brown	c104247_f1p1
brown	c104388_f1p1
brown	c10440_f1p1
brown	c104678_f1p2
brown	c104787_f1p1
brown	c104989_f1p9
brown	c105466_f3p11
brown	c105715_f1p1
brown	c105735_f1p1
brown	c10573_f1p2
brown	c106005_f1p0
brown	c106087_f1p3
brown	c106246_f1p2
brown	c106326_f1p3
brown	c106355_f1p0
brown	c106518_f1p0
brown	c106624_f1p0
brown	c10729_f1p0
brown	c10826_f1p1
brown	c11014_f1p0
brown	c11071_f2p4
brown	c11209_f4p0
brown	c114291_f2p0
brown	c11594_f1p1
brown	c117955_f1p26
brown	c12089_f2p0
brown	c12162_f1p2
brown	c12493_f1p0
brown	c1252_f5p0
brown	c125510_f3p14
brown	c125724_f5p46
brown	c125913_f3p8
brown	c125949_f4p4
brown	c126048_f2p0
brown	c126115_f2p5
brown	c126237_f2p12
brown	c126292_f2p0
brown	c126399_f2p1
brown	c126670_f1p1
brown	c12685_f1p4
brown	c12692_f1p1
brown	c127132_f1p1
brown	c127175_f3p2
brown	c127199_f1p0
brown	c127246_f1p0
brown	c127499_f1p3
brown	c127789_f1p5
brown	c128030_f1p3
brown	c128177_f1p1
brown	c12830_f1p1
brown	c128457_f1p2
brown	c128826_f1p4
brown	c129022_f1p20
brown	c129344_f1p2
brown	c129405_f1p3
brown	c129508_f1p1
brown	c12953_f1p0
brown	c129594_f1p1
brown	c129819_f1p5
brown	c129948_f1p1
brown	c12998_f1p4
brown	c130235_f1p6
brown	c130365_f2p3
brown	c130414_f1p0
brown	c130458_f1p4
brown	c130547_f1p2
brown	c13084_f2p0
brown	c131520_f1p0
brown	c131662_f2p0
brown	c131731_f1p4
brown	c131832_f2p1
brown	c131872_f1p1
brown	c131885_f1p2
brown	c131899_f1p3
brown	c132105_f2p0
brown	c132231_f1p26
brown	c132370_f1p3
brown	c132392_f1p0
brown	c132394_f1p6
[truncated: 4,355 more rows]
