# Supplementary material for: Global transcriptome dissection of pollen–pistil interactions induced self-incompatibility in dragon fruit (Selenicereus spp.)
Source: PeerJ. 2022 Nov 1;10:e14165. doi: 10.7717/peerj.14165 (PMC9635355; doi:10.7717/peerj.14165)
Supplement: Table S5 — The green module and the 214 DEG sets have 132 genes shared, while the turquoise module and 982 DEG sets have 534 shared genes. The shared genes by two gene sets have been labeled as “shared” [file peerj-10-14165-s013.xlsx]

## Sheet: Supplement Table 5
Table S5.The members of the four key gene sets and their relationship. The green module and the 214 DEG sets have 132 genes shared, while the turquoise module and 982 DEG sets have 534 shared genes. The shared genes by two gene sets have been labeled as “shared”
Green module	Shared/Unique	The 214 DEGs				Turquoise module	Shared/Unique	The 982 DEGs
c100701_f4p6	Shared	c100701_f4p6				c100668_f1p1	Shared	c100668_f1p1
c102198_f1p0	Shared	c102198_f1p0				c101039_f1p0	Shared	c101039_f1p0
c103483_f3p6	Shared	c103483_f3p6				c101294_f1p6	Shared	c101294_f1p6
c103690_f1p1	Shared	c103690_f1p1				c10137_f1p1	Shared	c10137_f1p1
c104290_f1p1	Shared	c104290_f1p1				c101447_f12p7	Shared	c101447_f12p7
c105776_f4p9	Shared	c105776_f4p9				c101507_f1p0	Shared	c101507_f1p0
c108690_f1p0	Shared	c108690_f1p0				c101707_f2p10	Shared	c101707_f2p10
c10943_f1p2	Shared	c10943_f1p2				c101714_f1p7	Shared	c101714_f1p7
c10971_f2p1	Shared	c10971_f2p1				c101794_f1p1	Shared	c101794_f1p1
c1099_f8p4	Shared	c1099_f8p4				c101874_f1p3	Shared	c101874_f1p3
c11790_f2p2	Shared	c11790_f2p2				c101971_f1p4	Shared	c101971_f1p4
c12076_f2p4	Shared	c12076_f2p4				c102034_f1p0	Shared	c102034_f1p0
c12443_f5p3	Shared	c12443_f5p3				c102422_f1p1	Shared	c102422_f1p1
c126029_f3p4	Shared	c126029_f3p4				c102733_f3p5	Shared	c102733_f3p5
c126764_f1p5	Shared	c126764_f1p5				c102843_f1p1	Shared	c102843_f1p1
c127233_f3p2	Shared	c127233_f3p2				c1031_f6p1	Shared	c1031_f6p1
c127680_f1p3	Shared	c127680_f1p3				c103101_f1p0	Shared	c103101_f1p0
c127787_f1p9	Shared	c127787_f1p9				c103104_f1p0	Shared	c103104_f1p0
c128102_f1p7	Shared	c128102_f1p7				c103160_f1p13	Shared	c103160_f1p13
c128285_f1p15	Shared	c128285_f1p15				c103214_f1p12	Shared	c103214_f1p12
c128411_f1p2	Shared	c128411_f1p2				c10335_f1p0	Shared	c10335_f1p0
c130684_f1p9	Shared	c130684_f1p9				c103385_f1p0	Shared	c103385_f1p0
c131301_f1p7	Shared	c131301_f1p7				c103401_f2p1	Shared	c103401_f2p1
c132612_f1p0	Shared	c132612_f1p0				c103407_f1p3	Shared	c103407_f1p3
c1335_f18p11	Shared	c1335_f18p11				c103948_f3p3	Shared	c103948_f3p3
c134313_f1p3	Shared	c134313_f1p3				c103981_f1p1	Shared	c103981_f1p1
c1362_f3p0	Shared	c1362_f3p0				c10431_f1p1	Shared	c10431_f1p1
c138141_f1p3	Shared	c138141_f1p3				c104373_f1p0	Shared	c104373_f1p0
c138187_f1p1	Shared	c138187_f1p1				c104638_f1p0	Shared	c104638_f1p0
c139079_f1p2	Shared	c139079_f1p2				c104651_f1p2	Shared	c104651_f1p2
c139494_f1p1	Shared	c139494_f1p1				c104674_f2p5	Shared	c104674_f2p5
c14292_f2p1	Shared	c14292_f2p1				c105015_f2p0	Shared	c105015_f2p0
c143243_f1p10	Shared	c143243_f1p10				c105261_f1p6	Shared	c105261_f1p6
c1488_f1p9	Shared	c1488_f1p9				c105445_f1p0	Shared	c105445_f1p0
c161600_f1p9	Shared	c161600_f1p9				c105882_f1p0	Shared	c105882_f1p0
c162704_f1p1	Shared	c162704_f1p1				c105948_f1p0	Shared	c105948_f1p0
c163443_f1p5	Shared	c163443_f1p5				c106057_f1p0	Shared	c106057_f1p0
c165004_f1p0	Shared	c165004_f1p0				c106266_f2p1	Shared	c106266_f2p1
c165642_f1p4	Shared	c165642_f1p4				c106476_f2p1	Shared	c106476_f2p1
c167802_f1p8	Shared	c167802_f1p8				c106632_f1p4	Shared	c106632_f1p4
c167907_f1p2	Shared	c167907_f1p2				c10672_f1p1	Shared	c10672_f1p1
c175512_f4p2	Shared	c175512_f4p2				c10704_f1p9	Shared	c10704_f1p9
c181120_f2p1	Shared	c181120_f2p1				c110290_f2p5	Shared	c110290_f2p5
c1820_f3p3	Shared	c1820_f3p3				c11160_f1p1	Shared	c11160_f1p1
c1860_f2p0	Shared	c1860_f2p0				c11185_f1p0	Shared	c11185_f1p0
c189288_f11p22	Shared	c189288_f11p22				c11294_f2p1	Shared	c11294_f2p1
c189444_f2p8	Shared	c189444_f2p8				c11337_f2p1	Shared	c11337_f2p1
c189451_f3p7	Shared	c189451_f3p7				c11510_f1p0	Shared	c11510_f1p0
c189456_f2p2	Shared	c189456_f2p2				c11898_f1p0	Shared	c11898_f1p0
c193252_f16p7	Shared	c193252_f16p7				c11954_f1p1	Shared	c11954_f1p1
c1947_f8p6	Shared	c1947_f8p6				c120_f5p10	Shared	c120_f5p10
c204236_f1p1	Shared	c204236_f1p1				c121593_f3p1	Shared	c121593_f3p1
c205217_f1p0	Shared	c205217_f1p0				c12180_f1p1	Shared	c12180_f1p1
c205365_f1p3	Shared	c205365_f1p3				c123245_f6p3	Shared	c123245_f6p3
c205477_f1p0	Shared	c205477_f1p0				c125469_f210p58	Shared	c125469_f210p58
c205751_f1p0	Shared	c205751_f1p0				c125807_f4p5	Shared	c125807_f4p5
c205802_f1p2	Shared	c205802_f1p2				c125811_f4p7	Shared	c125811_f4p7
c206310_f1p1	Shared	c206310_f1p1				c126393_f2p5	Shared	c126393_f2p5
c206372_f1p0	Shared	c206372_f1p0				c126455_f2p1	Shared	c126455_f2p1
c206622_f1p1	Shared	c206622_f1p1				c126533_f2p1	Shared	c126533_f2p1
c206987_f1p1	Shared	c206987_f1p1				c126563_f2p15	Shared	c126563_f2p15
c207266_f1p0	Shared	c207266_f1p0				c126574_f2p3	Shared	c126574_f2p3
c2100_f2p0	Shared	c2100_f2p0				c126634_f1p1	Shared	c126634_f1p1
c2239_f3p1	Shared	c2239_f3p1				c12711_f3p0	Shared	c12711_f3p0
c2642_f1p4	Shared	c2642_f1p4				c127173_f1p0	Shared	c127173_f1p0
c27234_f18p7	Shared	c27234_f18p7				c127391_f1p2	Shared	c127391_f1p2
c27295_f19p6	Shared	c27295_f19p6				c127449_f2p1	Shared	c127449_f2p1
c27501_f10p4	Shared	c27501_f10p4				c128726_f1p5	Shared	c128726_f1p5
c27627_f8p32	Shared	c27627_f8p32				c129003_f1p7	Shared	c129003_f1p7
c27628_f5p7	Shared	c27628_f5p7				c129268_f2p1	Shared	c129268_f2p1
c28368_f3p4	Shared	c28368_f3p4				c1293_f4p1	Shared	c1293_f4p1
c28391_f4p1	Shared	c28391_f4p1				c129489_f1p1	Shared	c129489_f1p1
c29732_f8p8	Shared	c29732_f8p8				c129892_f1p0	Shared	c129892_f1p0
c30079_f2p2	Shared	c30079_f2p2				c130276_f1p0	Shared	c130276_f1p0
c31297_f2p2	Shared	c31297_f2p2				c130430_f1p7	Shared	c130430_f1p7
c34569_f4p12	Shared	c34569_f4p12				c130643_f1p1	Shared	c130643_f1p1
c34650_f2p3	Shared	c34650_f2p3				c131053_f1p1	Shared	c131053_f1p1
c36043_f2p3	Shared	c36043_f2p3				c13106_f1p4	Shared	c13106_f1p4
c37134_f1p0	Shared	c37134_f1p0				c131104_f1p0	Shared	c131104_f1p0
c37555_f2p5	Shared	c37555_f2p5				c131143_f1p3	Shared	c131143_f1p3
c38218_f1p2	Shared	c38218_f1p2				c131212_f2p0	Shared	c131212_f2p0
c38977_f1p8	Shared	c38977_f1p8				c131630_f1p3	Shared	c131630_f1p3
c39130_f6p5	Shared	c39130_f6p5				c131646_f1p3	Shared	c131646_f1p3
c40327_f1p0	Shared	c40327_f1p0				c131771_f1p0	Shared	c131771_f1p0
c40962_f6p6	Shared	c40962_f6p6				c131874_f1p0	Shared	c131874_f1p0
c42024_f7p9	Shared	c42024_f7p9				c132476_f1p0	Shared	c132476_f1p0
c4376_f1p1	Shared	c4376_f1p1				c132605_f1p3	Shared	c132605_f1p3
c49138_f2p5	Shared	c49138_f2p5				c1328_f4p0	Shared	c1328_f4p0
c570_f20p2	Shared	c570_f20p2				c133171_f1p3	Shared	c133171_f1p3
c60332_f6p1	Shared	c60332_f6p1				c133493_f2p0	Shared	c133493_f2p0
c60419_f20p11	Shared	c60419_f20p11				c133872_f1p1	Shared	c133872_f1p1
c60557_f5p9	Shared	c60557_f5p9				c133999_f1p1	Shared	c133999_f1p1
c60699_f7p7	Shared	c60699_f7p7				c134046_f4p3	Shared	c134046_f4p3
c60812_f4p5	Shared	c60812_f4p5				c134054_f1p4	Shared	c134054_f1p4
c60862_f6p2	Shared	c60862_f6p2				c134356_f1p1	Shared	c134356_f1p1
c60929_f2p1	Shared	c60929_f2p1				c134533_f1p0	Shared	c134533_f1p0
c61283_f3p1	Shared	c61283_f3p1				c134648_f1p2	Shared	c134648_f1p2
c63851_f1p0	Shared	c63851_f1p0				c134942_f1p0	Shared	c134942_f1p0
c63946_f1p1	Shared	c63946_f1p1				c135484_f1p0	Shared	c135484_f1p0
c65529_f2p15	Shared	c65529_f2p15				c135602_f2p6	Shared	c135602_f2p6
c66911_f1p5	Shared	c66911_f1p5				c135796_f2p2	Shared	c135796_f2p2
c67032_f5p1	Shared	c67032_f5p1				c135830_f1p4	Shared	c135830_f1p4
c67082_f1p12	Shared	c67082_f1p12				c135917_f3p21	Shared	c135917_f3p21
c6748_f2p2	Shared	c6748_f2p2				c135986_f1p0	Shared	c135986_f1p0
c67491_f1p3	Shared	c67491_f1p3				c135988_f1p1	Shared	c135988_f1p1
c6777_f3p0	Shared	c6777_f3p0				c136301_f2p2	Shared	c136301_f2p2
c6868_f5p4	Shared	c6868_f5p4				c136325_f1p3	Shared	c136325_f1p3
c69012_f2p0	Shared	c69012_f2p0				c136475_f1p1	Shared	c136475_f1p1
c69173_f1p5	Shared	c69173_f1p5				c137080_f1p2	Shared	c137080_f1p2
c69463_f1p1	Shared	c69463_f1p1				c137149_f1p2	Shared	c137149_f1p2
c69766_f1p3	Shared	c69766_f1p3				c137663_f1p1	Shared	c137663_f1p1
c70692_f1p1	Shared	c70692_f1p1				c137898_f1p7	Shared	c137898_f1p7
c71148_f1p1	Shared	c71148_f1p1				c137969_f1p3	Shared	c137969_f1p3
c71772_f1p7	Shared	c71772_f1p7				c138588_f3p14	Shared	c138588_f3p14
c73307_f3p12	Shared	c73307_f3p12				c138618_f1p0	Shared	c138618_f1p0
c7531_f1p0	Shared	c7531_f1p0				c138902_f1p4	Shared	c138902_f1p4
c7773_f1p1	Shared	c7773_f1p1				c139176_f1p7	Shared	c139176_f1p7
c7984_f1p0	Shared	c7984_f1p0				c139410_f1p1	Shared	c139410_f1p1
c8173_f1p0	Shared	c8173_f1p0				c139480_f1p1	Shared	c139480_f1p1
c825_f9p3	Shared	c825_f9p3				c139614_f1p0	Shared	c139614_f1p0
c92718_f50p33	Shared	c92718_f50p33				c139618_f1p1	Shared	c139618_f1p1
c92736_f25p20	Shared	c92736_f25p20				c139873_f1p5	Shared	c139873_f1p5
c92884_f6p4	Shared	c92884_f6p4				c140114_f1p0	Shared	c140114_f1p0
c93000_f5p12	Shared	c93000_f5p12				c140133_f1p2	Shared	c140133_f1p2
c93685_f1p8	Shared	c93685_f1p8				c140366_f1p1	Shared	c140366_f1p1
c94424_f1p0	Shared	c94424_f1p0				c140551_f1p0	Shared	c140551_f1p0
c95864_f1p11	Shared	c95864_f1p11				c140621_f1p2	Shared	c140621_f1p2
c9775_f1p0	Shared	c9775_f1p0				c145104_f1p17	Shared	c145104_f1p17
c9808_f1p3	Shared	c9808_f1p3				c147975_f3p5	Shared	c147975_f3p5
c98090_f1p3	Shared	c98090_f1p3				c156193_f2p3	Shared	c156193_f2p3
c99737_f1p2	Shared	c99737_f1p2				c159840_f4p0	Shared	c159840_f4p0
c99788_f1p7	Shared	c99788_f1p7				c159946_f27p7	Shared	c159946_f27p7
c100043_f1p2	Unique	c100935_f1p1				c159952_f1p6	Shared	c159952_f1p6
c100951_f1p0	Unique	c103703_f2p35				c160028_f20p22	Shared	c160028_f20p22
c101110_f1p3	Unique	c104720_f1p9				c160315_f6p21	Shared	c160315_f6p21
c101371_f1p1	Unique	c105605_f1p1				c160427_f1p4	Shared	c160427_f1p4
c101615_f1p3	Unique	c105794_f1p0				c160617_f4p6	Shared	c160617_f4p6
c101884_f2p6	Unique	c106066_f3p5				c1608_f3p0	Shared	c1608_f3p0
c102243_f1p1	Unique	c106312_f5p16				c161033_f1p1	Shared	c161033_f1p1
c103224_f1p3	Unique	c106678_f28p7				c161393_f1p0	Shared	c161393_f1p0
c103707_f1p0	Unique	c11856_f2p1				c162742_f1p1	Shared	c162742_f1p1
c104097_f1p3	Unique	c12058_f1p0				c162831_f1p8	Shared	c162831_f1p8
c104120_f1p1	Unique	c121593_f3p1				c162987_f1p0	Shared	c162987_f1p0
c104308_f1p2	Unique	c125494_f1p1				c163071_f1p0	Shared	c163071_f1p0
c10483_f1p4	Unique	c125769_f8p21				c163859_f1p7	Shared	c163859_f1p7
c104844_f2p12	Unique	c125790_f4p6				c164013_f2p4	Shared	c164013_f2p4
c105323_f2p4	Unique	c127728_f1p3				c164716_f1p6	Shared	c164716_f1p6
c105402_f1p1	Unique	c127909_f6p2				c164760_f1p0	Shared	c164760_f1p0
c105534_f1p4	Unique	c128050_f1p4				c164765_f1p1	Shared	c164765_f1p1
c105967_f2p1	Unique	c129542_f1p2				c164956_f1p3	Shared	c164956_f1p3
c105989_f1p7	Unique	c134415_f1p10				c165026_f1p1	Shared	c165026_f1p1
c1061_f4p2	Unique	c135690_f2p12				c165756_f1p3	Shared	c165756_f1p3
c106146_f1p0	Unique	c136249_f1p2				c166330_f1p2	Shared	c166330_f1p2
c106213_f1p0	Unique	c137806_f1p14				c166445_f1p1	Shared	c166445_f1p1
c106373_f2p0	Unique	c138650_f1p2				c166535_f1p0	Shared	c166535_f1p0
c106412_f2p2	Unique	c156195_f2p0				c166945_f1p1	Shared	c166945_f1p1
c10663_f1p3	Unique	c160517_f2p1				c166949_f1p2	Shared	c166949_f1p2
c106800_f5p7	Unique	c160548_f1p1				c167131_f1p0	Shared	c167131_f1p0
c10701_f1p3	Unique	c160622_f2p1				c167218_f1p3	Shared	c167218_f1p3
c1084_f4p0	Unique	c164765_f1p1				c167234_f1p6	Shared	c167234_f1p6
c1092_f4p3	Unique	c165601_f1p5				c167649_f1p0	Shared	c167649_f1p0
c109330_f2p8	Unique	c166218_f1p8				c168839_f1p0	Shared	c168839_f1p0
c110677_f2p10	Unique	c166637_f3p30				c168911_f1p1	Shared	c168911_f1p1
c11542_f2p1	Unique	c185082_f2p12				c169357_f1p1	Shared	c169357_f1p1
c119242_f1p2	Unique	c185092_f7p36				c169388_f1p1	Shared	c169388_f1p1
c12198_f1p6	Unique	c188710_f11p12				c169618_f1p0	Shared	c169618_f1p0
c12388_f1p0	Unique	c188789_f2p6				c170364_f5p15	Shared	c170364_f5p15
c12415_f2p5	Unique	c188974_f3p4				c174377_f1p2	Shared	c174377_f1p2
c125699_f9p6	Unique	c188983_f9p10				c1784_f2p63	Shared	c1784_f2p63
c12576_f2p3	Unique	c189213_f1p4				c179655_f1p3	Shared	c179655_f1p3
c125946_f3p5	Unique	c189422_f2p2				c181349_f1p28	Shared	c181349_f1p28
c1261_f4p0	Unique	c189440_f1p0				c1821_f2p0	Shared	c1821_f2p0
c126319_f1p2	Unique	c192266_f3p0				c1837_f2p4	Shared	c1837_f2p4
c126420_f2p13	Unique	c196816_f4p1				c185026_f2p5	Shared	c185026_f2p5
c1265_f5p0	Unique	c202369_f1p0				c185090_f2p3	Shared	c185090_f2p3
c12718_f1p0	Unique	c205142_f1p5				c188994_f1p4	Shared	c188994_f1p4
c127336_f1p5	Unique	c206298_f1p0				c189018_f1p5	Shared	c189018_f1p5
c127843_f2p3	Unique	c206474_f1p4				c189035_f5p6	Shared	c189035_f5p6
c127978_f1p1	Unique	c207062_f1p2				c189037_f1p12	Shared	c189037_f1p12
c128060_f3p5	Unique	c207202_f1p0				c189067_f1p11	Shared	c189067_f1p11
c128687_f1p5	Unique	c27387_f4p5				c189116_f9p3	Shared	c189116_f9p3
c1290_f3p5	Unique	c27515_f9p8				c189407_f16p17	Shared	c189407_f16p17
c129856_f1p3	Unique	c28237_f12p5				c189985_f2p3	Shared	c189985_f2p3
c129912_f1p1	Unique	c29204_f4p8				c190566_f5p6	Shared	c190566_f5p6
c130118_f1p6	Unique	c30157_f1p3				c1913_f2p1	Shared	c1913_f2p1
c13031_f1p3	Unique	c32535_f3p5				c191682_f2p5	Shared	c191682_f2p5
c13039_f1p1	Unique	c34082_f2p9				c193248_f12p25	Shared	c193248_f12p25
c130797_f1p3	Unique	c35972_f1p6				c1962_f2p0	Shared	c1962_f2p0
c132118_f1p9	Unique	c36066_f1p2				c196875_f4p12	Shared	c196875_f4p12
c132514_f1p5	Unique	c36198_f1p4				c204073_f3p5	Shared	c204073_f3p5
c133311_f1p1	Unique	c36543_f1p4				c204096_f2p3	Shared	c204096_f2p3
c133384_f1p0	Unique	c39621_f6p4				c204403_f1p9	Shared	c204403_f1p9
c134064_f1p7	Unique	c57180_f4p0				c204408_f1p5	Shared	c204408_f1p5
c134332_f2p0	Unique	c5800_f1p1				c204508_f1p0	Shared	c204508_f1p0
c134442_f1p1	Unique	c60443_f1p5				c204541_f1p0	Shared	c204541_f1p0
c136547_f1p2	Unique	c64088_f1p0				c204568_f1p1	Shared	c204568_f1p1
c13732_f1p11	Unique	c65959_f2p9				c204693_f1p7	Shared	c204693_f1p7
c137716_f1p5	Unique	c67377_f1p3				c204698_f1p14	Shared	c204698_f1p14
c1379_f3p0	Unique	c67947_f1p0				c204716_f1p13	Shared	c204716_f1p13
c137953_f1p1	Unique	c68177_f1p4				c204721_f1p3	Shared	c204721_f1p3
c1380_f4p4	Unique	c6841_f1p2				c204755_f1p6	Shared	c204755_f1p6
c138225_f1p2	Unique	c70254_f2p5				c204757_f1p6	Shared	c204757_f1p6
c1386_f5p1	Unique	c72744_f4p6				c204822_f1p11	Shared	c204822_f1p11
c138785_f2p4	Unique	c73306_f1p8				c204927_f1p1	Shared	c204927_f1p1
c138867_f1p4	Unique	c73436_f6p7				c205212_f1p1	Shared	c205212_f1p1
c139820_f1p6	Unique	c92549_f3p8				c205231_f1p3	Shared	c205231_f1p3
c140281_f1p3	Unique	c92697_f64p27				c205382_f1p0	Shared	c205382_f1p0
c142953_f3p2	Unique	c92700_f7p32				c205395_f1p0	Shared	c205395_f1p0
c1441_f3p1	Unique	c92867_f8p10				c205703_f1p0	Shared	c205703_f1p0
c1443_f4p1	Unique	c93086_f2p8				c205764_f1p1	Shared	c205764_f1p1
c148806_f2p3	Unique	c94485_f1p11				c205933_f1p0	Shared	c205933_f1p0
c158102_f1p3	Unique	c95832_f1p9				c205954_f1p1	Shared	c205954_f1p1
c160198_f9p13	Unique	c95928_f3p27				c206278_f1p1	Shared	c206278_f1p1
c160564_f2p0	Unique	c99356_f1p1				c206283_f1p1	Shared	c206283_f1p1
c160636_f2p1	Unique					c206332_f1p0	Shared	c206332_f1p0
c160707_f4p4	Unique					c206380_f1p7	Shared	c206380_f1p7
c160816_f1p17	Unique					c206392_f1p0	Shared	c206392_f1p0
c161296_f1p0	Unique					c206673_f1p1	Shared	c206673_f1p1
c1614_f2p0	Unique					c206756_f1p0	Shared	c206756_f1p0
c161941_f1p1	Unique					c206772_f1p2	Shared	c206772_f1p2
c162202_f1p1	Unique					c206863_f1p1	Shared	c206863_f1p1
c162463_f2p6	Unique					c207259_f1p1	Shared	c207259_f1p1
c163706_f1p0	Unique					c207299_f1p1	Shared	c207299_f1p1
c164068_f1p4	Unique					c207336_f1p3	Shared	c207336_f1p3
c164423_f1p5	Unique					c207386_f1p1	Shared	c207386_f1p1
c164703_f1p4	Unique					c207518_f1p2	Shared	c207518_f1p2
c165341_f1p6	Unique					c207519_f1p1	Shared	c207519_f1p1
c165681_f5p0	Unique					c207552_f1p0	Shared	c207552_f1p0
c165958_f1p8	Unique					c2226_f2p1	Shared	c2226_f2p1
c166102_f1p0	Unique					c2335_f1p4	Shared	c2335_f1p4
c166340_f1p3	Unique					c24755_f17p7	Shared	c24755_f17p7
c166653_f1p0	Unique					c26945_f3p2	Shared	c26945_f3p2
c166696_f1p0	Unique					c27007_f65p8	Shared	c27007_f65p8
c167237_f1p1	Unique					c27095_f28p9	Shared	c27095_f28p9
c167285_f1p0	Unique					c27181_f20p16	Shared	c27181_f20p16
c167516_f1p3	Unique					c27241_f15p17	Shared	c27241_f15p17
c167888_f1p2	Unique					c27317_f18p17	Shared	c27317_f18p17
c168277_f1p1	Unique					c27368_f9p6	Shared	c27368_f9p6
c1687_f2p3	Unique					c27383_f21p12	Shared	c27383_f21p12
c177927_f1p4	Unique					c27399_f22p4	Shared	c27399_f22p4
c179424_f1p5	Unique					c27529_f5p4	Shared	c27529_f5p4
c1810_f2p1	Unique					c27630_f3p6	Shared	c27630_f3p6
c181382_f10p5	Unique					c27785_f6p8	Shared	c27785_f6p8
c182154_f3p7	Unique					c27806_f4p0	Shared	c27806_f4p0
c185008_f4p2	Unique					c27811_f5p2	Shared	c27811_f5p2
c185342_f9p4	Unique					c27835_f6p3	Shared	c27835_f6p3
c186631_f1p0	Unique					c28027_f2p5	Shared	c28027_f2p5
c188719_f6p2	Unique					c28097_f9p3	Shared	c28097_f9p3
c188762_f4p7	Unique					c28125_f6p22	Shared	c28125_f6p22
c188798_f2p0	Unique					c28146_f2p2	Shared	c28146_f2p2
c188840_f7p9	Unique					c28155_f2p6	Shared	c28155_f2p6
c188975_f64p11	Unique					c28176_f9p8	Shared	c28176_f9p8
c189006_f10p10	Unique					c28190_f5p3	Shared	c28190_f5p3
c189161_f2p1	Unique					c28268_f2p0	Shared	c28268_f2p0
c189285_f25p5	Unique					c28292_f5p4	Shared	c28292_f5p4
c189321_f6p1	Unique					c2839_f2p0	Shared	c2839_f2p0
c189437_f6p2	Unique					c28445_f4p3	Shared	c28445_f4p3
c196833_f5p3	Unique					c28491_f3p0	Shared	c28491_f3p0
c204057_f6p2	Unique					c28526_f6p1	Shared	c28526_f6p1
c204104_f1p0	Unique					c28542_f9p6	Shared	c28542_f9p6
c204298_f1p1	Unique					c28658_f3p1	Shared	c28658_f3p1
c204453_f1p2	Unique					c28682_f7p14	Shared	c28682_f7p14
c204501_f1p2	Unique					c28713_f2p12	Shared	c28713_f2p12
c204560_f1p0	Unique					c28741_f4p1	Shared	c28741_f4p1
c204647_f1p2	Unique					c28763_f2p0	Shared	c28763_f2p0
c204654_f1p2	Unique					c28784_f2p0	Shared	c28784_f2p0
c204886_f1p1	Unique					c28815_f1p0	Shared	c28815_f1p0
c205257_f1p0	Unique					c29266_f1p1	Shared	c29266_f1p1
c205325_f1p1	Unique					c29325_f3p2	Shared	c29325_f3p2
c205368_f1p0	Unique					c29327_f4p2	Shared	c29327_f4p2
c205761_f1p5	Unique					c29501_f1p5	Shared	c29501_f1p5
c2060_f2p0	Unique					c29581_f1p1	Shared	c29581_f1p1
c206091_f1p0	Unique					c29847_f1p0	Shared	c29847_f1p0
c206168_f1p0	Unique					c29932_f3p11	Shared	c29932_f3p11
c206179_f1p1	Unique					c29974_f7p6	Shared	c29974_f7p6
c206705_f1p1	Unique					c30021_f1p0	Shared	c30021_f1p0
c206953_f1p1	Unique					c30140_f1p0	Shared	c30140_f1p0
c206966_f1p1	Unique					c30346_f1p4	Shared	c30346_f1p4
c206999_f1p1	Unique					c30348_f1p2	Shared	c30348_f1p2
c207483_f1p3	Unique					c30422_f4p2	Shared	c30422_f4p2
c2132_f5p4	Unique					c3050_f1p2	Shared	c3050_f1p2
c2192_f5p4	Unique					c31052_f3p6	Shared	c31052_f3p6
c2320_f1p1	Unique					c3121_f1p0	Shared	c3121_f1p0
c2487_f1p0	Unique					c31212_f3p6	Shared	c31212_f3p6
c2591_f1p0	Unique					c3125_f1p1	Shared	c3125_f1p1
c26987_f9p16	Unique					c31256_f4p3	Shared	c31256_f4p3
c27245_f10p12	Unique					c31274_f5p0	Shared	c31274_f5p0
c27510_f10p2	Unique					c31697_f1p4	Shared	c31697_f1p4
c27619_f9p4	Unique					c31874_f4p4	Shared	c31874_f4p4
c27667_f6p14	Unique					c31947_f1p1	Shared	c31947_f1p1
c27681_f12p9	Unique					c32138_f1p14	Shared	c32138_f1p14
c27767_f11p10	Unique					c32541_f2p2	Shared	c32541_f2p2
c27814_f8p11	Unique					c32765_f1p0	Shared	c32765_f1p0
c27971_f4p3	Unique					c32898_f3p0	Shared	c32898_f3p0
c2800_f1p4	Unique					c32939_f2p5	Shared	c32939_f2p5
c28187_f3p3	Unique					c33201_f1p1	Shared	c33201_f1p1
c28362_f4p2	Unique					c33206_f1p1	Shared	c33206_f1p1
c28463_f3p8	Unique					c33312_f1p1	Shared	c33312_f1p1
c28837_f2p0	Unique					c33356_f1p2	Shared	c33356_f1p2
c29008_f1p0	Unique					c33442_f1p1	Shared	c33442_f1p1
c29308_f1p5	Unique					c33463_f1p6	Shared	c33463_f1p6
c29391_f3p7	Unique					c3360_f3p3	Shared	c3360_f3p3
c2942_f1p0	Unique					c33617_f1p0	Shared	c33617_f1p0
c29423_f1p1	Unique					c33807_f1p0	Shared	c33807_f1p0
c29445_f1p0	Unique					c33865_f4p0	Shared	c33865_f4p0
c30010_f1p2	Unique					c33895_f2p1	Shared	c33895_f2p1
c30074_f2p2	Unique					c34100_f1p0	Shared	c34100_f1p0
c31197_f2p9	Unique					c34326_f1p1	Shared	c34326_f1p1
c31633_f4p8	Unique					c34487_f2p7	Shared	c34487_f2p7
c31990_f1p1	Unique					c34653_f1p0	Shared	c34653_f1p0
c32216_f2p2	Unique					c34789_f3p1	Shared	c34789_f3p1
c32350_f1p1	Unique					c34957_f1p2	Shared	c34957_f1p2
c33168_f2p0	Unique					c35044_f1p2	Shared	c35044_f1p2
c33259_f1p0	Unique					c35204_f2p0	Shared	c35204_f2p0
c3362_f1p0	Unique					c3524_f1p1	Shared	c3524_f1p1
c34359_f1p0	Unique					c35302_f1p0	Shared	c35302_f1p0
c34737_f2p3	Unique					c35381_f1p2	Shared	c35381_f1p2
c35107_f1p0	Unique					c35410_f2p2	Shared	c35410_f2p2
c35744_f1p6	Unique					c35469_f4p8	Shared	c35469_f4p8
c35920_f1p10	Unique					c35547_f1p0	Shared	c35547_f1p0
c35960_f1p2	Unique					c364_f12p8	Shared	c364_f12p8
c36186_f5p8	Unique					c36544_f1p2	Shared	c36544_f1p2
c36187_f1p0	Unique					c36729_f1p0	Shared	c36729_f1p0
c36471_f1p1	Unique					c36915_f2p0	Shared	c36915_f2p0
c36507_f1p1	Unique					c36974_f1p2	Shared	c36974_f1p2
c36846_f2p0	Unique					c37390_f5p9	Shared	c37390_f5p9
c36874_f1p1	Unique					c37520_f1p0	Shared	c37520_f1p0
c37043_f2p2	Unique					c37566_f1p3	Shared	c37566_f1p3
c372_f6p12	Unique					c37611_f1p1	Shared	c37611_f1p1
c37417_f1p2	Unique					c37628_f4p2	Shared	c37628_f4p2
c37564_f1p2	Unique					c38166_f3p3	Shared	c38166_f3p3
c38369_f1p0	Unique					c38212_f2p0	Shared	c38212_f2p0
c38461_f1p1	Unique					c38342_f2p1	Shared	c38342_f2p1
c38727_f1p1	Unique					c38497_f1p0	Shared	c38497_f1p0
c39012_f1p9	Unique					c38517_f1p1	Shared	c38517_f1p1
c39349_f1p0	Unique					c38636_f1p1	Shared	c38636_f1p1
c39446_f1p1	Unique					c38695_f4p6	Shared	c38695_f4p6
c39758_f1p2	Unique					c38759_f2p1	Shared	c38759_f2p1
c39979_f1p1	Unique					c38906_f2p6	Shared	c38906_f2p6
c4053_f1p5	Unique					c39020_f1p4	Shared	c39020_f1p4
c40536_f1p1	Unique					c39135_f1p1	Shared	c39135_f1p1
c40647_f1p2	Unique					c39198_f2p0	Shared	c39198_f2p0
c40669_f1p1	Unique					c3920_f2p0	Shared	c3920_f2p0
c41265_f3p4	Unique					c3934_f2p1	Shared	c3934_f2p1
c41719_f2p4	Unique					c39835_f1p0	Shared	c39835_f1p0
c41808_f1p1	Unique					c39869_f1p0	Shared	c39869_f1p0
c4191_f1p0	Unique					c39934_f2p17	Shared	c39934_f2p17
c42186_f2p0	Unique					c40191_f3p3	Shared	c40191_f3p3
c423_f4p5	Unique					c40251_f2p0	Shared	c40251_f2p0
c4358_f1p0	Unique					c40387_f1p0	Shared	c40387_f1p0
c4373_f1p2	Unique					c40687_f3p3	Shared	c40687_f3p3
c4396_f1p4	Unique					c40890_f1p0	Shared	c40890_f1p0
c4400_f1p0	Unique					c40933_f4p2	Shared	c40933_f4p2
c44386_f16p3	Unique					c41065_f1p0	Shared	c41065_f1p0
c4503_f1p1	Unique					c41161_f1p3	Shared	c41161_f1p3
c4559_f1p0	Unique					c41235_f1p0	Shared	c41235_f1p0
c4793_f1p2	Unique					c41286_f1p0	Shared	c41286_f1p0
c5054_f5p2	Unique					c41391_f2p0	Shared	c41391_f2p0
c5598_f1p4	Unique					c416_f25p6	Shared	c416_f25p6
c61094_f2p4	Unique					c41613_f1p4	Shared	c41613_f1p4
c61143_f1p4	Unique					c41647_f1p0	Shared	c41647_f1p0
c61316_f3p1	Unique					c41726_f3p0	Shared	c41726_f3p0
c62162_f1p6	Unique					c41750_f1p0	Shared	c41750_f1p0
c62218_f2p0	Unique					c41910_f1p0	Shared	c41910_f1p0
c62233_f1p3	Unique					c42019_f1p4	Shared	c42019_f1p4
c6334_f1p0	Unique					c42155_f2p1	Shared	c42155_f2p1
c63415_f1p2	Unique					c42442_f1p3	Shared	c42442_f1p3
c63675_f2p3	Unique					c42574_f1p0	Shared	c42574_f1p0
c64167_f2p1	Unique					c42701_f1p2	Shared	c42701_f1p2
c64172_f1p8	Unique					c4315_f3p0	Shared	c4315_f3p0
c64304_f1p5	Unique					c4700_f1p0	Shared	c4700_f1p0
c64439_f1p3	Unique					c5186_f1p0	Shared	c5186_f1p0
c64455_f1p2	Unique					c5204_f1p0	Shared	c5204_f1p0
c64679_f2p3	Unique					c5257_f1p0	Shared	c5257_f1p0
c64833_f1p0	Unique					c560_f4p17	Shared	c560_f4p17
c64960_f1p1	Unique					c5614_f1p0	Shared	c5614_f1p0
c65157_f1p1	Unique					c5703_f1p0	Shared	c5703_f1p0
c65340_f1p3	Unique					c5811_f1p0	Shared	c5811_f1p0
c65449_f1p1	Unique					c60287_f59p22	Shared	c60287_f59p22
c65539_f1p2	Unique					c60527_f11p14	Shared	c60527_f11p14
c66048_f1p1	Unique					c60702_f4p1	Shared	c60702_f4p1
c66145_f2p8	Unique					c60735_f3p5	Shared	c60735_f3p5
c66302_f1p3	Unique					c60750_f3p0	Shared	c60750_f3p0
c66648_f1p1	Unique					c60820_f2p1	Shared	c60820_f2p1
c67251_f2p2	Unique					c61019_f3p8	Shared	c61019_f3p8
c67523_f2p0	Unique					c61076_f3p5	Shared	c61076_f3p5
c67792_f1p0	Unique					c6112_f47p8	Shared	c6112_f47p8
c67917_f1p1	Unique					c61150_f2p1	Shared	c61150_f2p1
c68140_f2p7	Unique					c61172_f2p1	Shared	c61172_f2p1
c68956_f1p0	Unique					c61179_f2p1	Shared	c61179_f2p1
c69542_f1p1	Unique					c61241_f2p0	Shared	c61241_f2p0
c69576_f3p3	Unique					c61489_f1p1	Shared	c61489_f1p1
c69619_f1p2	Unique					c61537_f1p3	Shared	c61537_f1p3
c70097_f1p0	Unique					c61796_f1p0	Shared	c61796_f1p0
c7050_f1p0	Unique					c61877_f1p2	Shared	c61877_f1p2
c70752_f1p4	Unique					c6194_f1p9	Shared	c6194_f1p9
c70794_f6p9	Unique					c62119_f1p1	Shared	c62119_f1p1
c70954_f1p2	Unique					c62262_f1p2	Shared	c62262_f1p2
c71198_f1p2	Unique					c62305_f1p1	Shared	c62305_f1p1
c71666_f3p10	Unique					c62321_f1p0	Shared	c62321_f1p0
c71943_f1p3	Unique					c6233_f1p0	Shared	c6233_f1p0
c71961_f1p1	Unique					c62359_f1p0	Shared	c62359_f1p0
c72078_f1p0	Unique					c62466_f1p3	Shared	c62466_f1p3
c72427_f1p0	Unique					c62662_f1p3	Shared	c62662_f1p3
c72505_f2p0	Unique					c6282_f1p1	Shared	c6282_f1p1
c73046_f1p0	Unique					c63182_f1p0	Shared	c63182_f1p0
c73376_f1p2	Unique					c63530_f1p0	Shared	c63530_f1p0
c73397_f1p1	Unique					c63609_f1p5	Shared	c63609_f1p5
c73468_f1p3	Unique					c63667_f1p2	Shared	c63667_f1p2
c73714_f1p1	Unique					c6378_f1p0	Shared	c6378_f1p0
c7528_f1p2	Unique					c63862_f1p0	Shared	c63862_f1p0
c7668_f2p0	Unique					c64118_f1p1	Shared	c64118_f1p1
c8043_f1p0	Unique					c64193_f2p28	Shared	c64193_f2p28
c834_f8p3	Unique					c64220_f1p0	Shared	c64220_f1p0
c858_f4p6	Unique					c64385_f2p2	Shared	c64385_f2p2
c859_f8p1	Unique					c64446_f1p0	Shared	c64446_f1p0
c8779_f1p0	Unique					c64460_f1p3	Shared	c64460_f1p3
c882_f4p0	Unique					c64608_f2p3	Shared	c64608_f2p3
c8837_f1p5	Unique					c64863_f1p1	Shared	c64863_f1p1
c885_f6p5	Unique					c65274_f2p3	Shared	c65274_f2p3
c8891_f20p3	Unique					c65520_f1p1	Shared	c65520_f1p1
c8943_f1p2	Unique					c66229_f1p8	Shared	c66229_f1p8
c9218_f1p1	Unique					c66254_f1p2	Shared	c66254_f1p2
c9226_f1p1	Unique					c66296_f1p1	Shared	c66296_f1p1
c9271_f1p0	Unique					c66522_f1p0	Shared	c66522_f1p0
c92784_f23p8	Unique					c66600_f1p2	Shared	c66600_f1p2
c92997_f3p1	Unique					c669_f6p4	Shared	c669_f6p4
c93262_f2p2	Unique					c66917_f1p2	Shared	c66917_f1p2
c93288_f2p3	Unique					c66969_f2p1	Shared	c66969_f2p1
c93328_f2p4	Unique					c66974_f1p1	Shared	c66974_f1p1
c93337_f2p3	Unique					c67202_f1p1	Shared	c67202_f1p1
c935_f5p1	Unique					c67214_f1p7	Shared	c67214_f1p7
c93691_f1p0	Unique					c67273_f2p3	Shared	c67273_f2p3
c93745_f1p3	Unique					c67277_f2p1	Shared	c67277_f2p1
c93898_f5p7	Unique					c67375_f1p3	Shared	c67375_f1p3
c93901_f1p12	Unique					c67579_f1p0	Shared	c67579_f1p0
c93950_f1p1	Unique					c67664_f2p4	Shared	c67664_f2p4
c94835_f1p2	Unique					c67830_f2p4	Shared	c67830_f2p4
c94925_f1p1	Unique					c6807_f3p0	Shared	c6807_f3p0
c95325_f1p2	Unique					c68109_f2p0	Shared	c68109_f2p0
c95530_f1p1	Unique					c68162_f1p1	Shared	c68162_f1p1
c9589_f2p3	Unique					c68308_f2p8	Shared	c68308_f2p8
c95945_f2p0	Unique					c68356_f1p0	Shared	c68356_f1p0
c96151_f1p0	Unique					c68415_f1p0	Shared	c68415_f1p0
c96283_f3p4	Unique					c68484_f1p3	Shared	c68484_f1p3
c96622_f1p2	Unique					c68622_f3p0	Shared	c68622_f3p0
c96759_f1p0	Unique					c68957_f2p1	Shared	c68957_f2p1
c96852_f2p3	Unique					c69129_f1p12	Shared	c69129_f1p12
c96995_f1p2	Unique					c69607_f1p1	Shared	c69607_f1p1
c97263_f4p4	Unique					c6968_f1p0	Shared	c6968_f1p0
c9754_f1p1	Unique					c69752_f1p26	Shared	c69752_f1p26
c97936_f2p2	Unique					c70148_f1p0	Shared	c70148_f1p0
c98151_f1p5	Unique					c70480_f1p8	Shared	c70480_f1p8
c98205_f1p1	Unique					c70675_f1p2	Shared	c70675_f1p2
c98821_f2p0	Unique					c70768_f1p0	Shared	c70768_f1p0
c98987_f1p0	Unique					c71151_f1p1	Shared	c71151_f1p1
c99361_f5p15	Unique					c71241_f1p6	Shared	c71241_f1p6
c99537_f1p3	Unique					c71242_f1p0	Shared	c71242_f1p0
c9973_f1p3	Unique					c71407_f4p1	Shared	c71407_f4p1
c9994_f1p0	Unique					c71450_f1p1	Shared	c71450_f1p1
c99957_f1p1	Unique					c71515_f2p2	Shared	c71515_f2p2
						c71564_f2p0	Shared	c71564_f2p0
						c71625_f1p0	Shared	c71625_f1p0
						c71662_f1p0	Shared	c71662_f1p0
						c71724_f1p0	Shared	c71724_f1p0
						c71950_f1p6	Shared	c71950_f1p6
						c72242_f1p2	Shared	c72242_f1p2
						c72748_f1p0	Shared	c72748_f1p0
						c72779_f1p1	Shared	c72779_f1p1
						c73003_f1p2	Shared	c73003_f1p2
						c73017_f1p4	Shared	c73017_f1p4
						c73086_f1p0	Shared	c73086_f1p0
						c73099_f1p0	Shared	c73099_f1p0
						c73271_f1p2	Shared	c73271_f1p2
						c73311_f1p9	Shared	c73311_f1p9
						c73338_f1p7	Shared	c73338_f1p7
						c73349_f1p0	Shared	c73349_f1p0
						c73492_f2p1	Shared	c73492_f2p1
						c73617_f1p0	Shared	c73617_f1p0
						c74107_f1p2	Shared	c74107_f1p2
						c7525_f1p0	Shared	c7525_f1p0
						c7543_f1p2	Shared	c7543_f1p2
						c7589_f10p9	Shared	c7589_f10p9
						c7791_f3p0	Shared	c7791_f3p0
						c81659_f1p1	Shared	c81659_f1p1
						c844_f6p2	Shared	c844_f6p2
						c8870_f1p0	Shared	c8870_f1p0
						c9066_f1p1	Shared	c9066_f1p1
						c9135_f1p2	Shared	c9135_f1p2
						c9244_f1p3	Shared	c9244_f1p3
						c92935_f3p3	Shared	c92935_f3p3
						c92995_f8p7	Shared	c92995_f8p7
						c93051_f3p4	Shared	c93051_f3p4
						c93229_f2p3	Shared	c93229_f2p3
						c93415_f2p6	Shared	c93415_f2p6
						c93594_f1p0	Shared	c93594_f1p0
						c93602_f5p4	Shared	c93602_f5p4
						c94005_f1p2	Shared	c94005_f1p2
						c94094_f1p0	Shared	c94094_f1p0
						c94241_f1p2	Shared	c94241_f1p2
						c94300_f1p0	Shared	c94300_f1p0
						c94632_f1p0	Shared	c94632_f1p0
						c94641_f3p6	Shared	c94641_f3p6
						c94708_f1p4	Shared	c94708_f1p4
						c94816_f1p0	Shared	c94816_f1p0
						c95882_f4p7	Shared	c95882_f4p7
						c9628_f1p0	Shared	c9628_f1p0
						c96372_f1p0	Shared	c96372_f1p0
						c96390_f1p0	Shared	c96390_f1p0
						c96539_f2p2	Shared	c96539_f2p2
						c96768_f1p3	Shared	c96768_f1p3
						c96799_f1p5	Shared	c96799_f1p5
						c97173_f1p1	Shared	c97173_f1p1
						c97206_f1p0	Shared	c97206_f1p0
						c97584_f1p0	Shared	c97584_f1p0
						c97717_f1p0	Shared	c97717_f1p0
						c97742_f1p1	Shared	c97742_f1p1
						c9778_f1p8	Shared	c9778_f1p8
						c97791_f4p5	Shared	c97791_f4p5
						c97827_f1p1	Shared	c97827_f1p1
						c97903_f1p2	Shared	c97903_f1p2
						c97919_f1p3	Shared	c97919_f1p3
						c97978_f1p0	Shared	c97978_f1p0
						c98354_f1p0	Shared	c98354_f1p0
						c9870_f1p1	Shared	c9870_f1p1
						c98707_f1p0	Shared	c98707_f1p0
						c98964_f1p0	Shared	c98964_f1p0
						c98984_f1p4	Shared	c98984_f1p4
						c99279_f2p26	Shared	c99279_f2p26
						c99347_f1p0	Shared	c99347_f1p0
						c99406_f1p4	Shared	c99406_f1p4
						c99434_f1p1	Shared	c99434_f1p1
						c99549_f1p1	Shared	c99549_f1p1
						c99718_f1p6	Shared	c99718_f1p6
						c100046_f1p0	Unique	c100534_f1p4
						c100067_f3p0	Unique	c100555_f1p3
						c100140_f1p8	Unique	c101029_f7p8
						c100145_f1p0	Unique	c101096_f1p1
						c100201_f1p0	Unique	c101184_f1p16
						c100216_f1p1	Unique	c101743_f1p1
						c100259_f1p0	Unique	c102038_f1p1
						c100264_f1p1	Unique	c102071_f1p3
						c100302_f1p1	Unique	c102759_f1p0
						c100332_f1p14	Unique	c102867_f1p4
						c100341_f1p3	Unique	c102945_f1p1
						c100381_f1p0	Unique	c1030_f6p4
						c100409_f1p0	Unique	c103224_f1p3
						c100426_f1p0	Unique	c103237_f2p4
						c100431_f1p1	Unique	c103280_f1p1
						c100455_f1p0	Unique	c103471_f1p5
						c100526_f1p4	Unique	c103486_f1p1
						c100584_f1p4	Unique	c103514_f1p0
						c100598_f5p8	Unique	c103519_f1p1
						c100643_f1p2	Unique	c103690_f1p1
						c100686_f1p7	Unique	c103805_f3p4
						c100749_f1p0	Unique	c103931_f2p7
						c100797_f2p0	Unique	c104083_f4p5
						c100810_f1p1	Unique	c1044_f5p3
						c100898_f1p0	Unique	c104981_f1p0
						c100934_f3p2	Unique	c105146_f1p3
						c100935_f1p1	Unique	c105466_f3p11
						c100943_f1p4	Unique	c105617_f1p2
						c10103_f1p0	Unique	c1057_f8p5
						c101121_f1p3	Unique	c10573_f1p2
						c101203_f1p1	Unique	c105977_f2p15
						c101266_f1p3	Unique	c106103_f7p5
						c101324_f1p4	Unique	c106337_f6p3
						c101339_f1p0	Unique	c106384_f1p2
						c101385_f2p7	Unique	c106576_f4p9
						c101391_f1p5	Unique	c10736_f1p1
						c101393_f2p3	Unique	c1077_f4p4
						c101570_f1p1	Unique	c10980_f1p0
						c101636_f3p5	Unique	c110010_f4p3
						c101757_f1p1	Unique	c11333_f1p1
						c101792_f1p5	Unique	c1137_f1p4
						c101838_f4p11	Unique	c117_f41p22
						c101873_f1p1	Unique	c11876_f1p0
						c102008_f1p0	Unique	c125287_f42p8
						c10204_f1p2	Unique	c125317_f3p4
						c102076_f1p2	Unique	c125455_f72p23
						c102184_f1p2	Unique	c125710_f8p15
						c102232_f1p0	Unique	c125738_f5p12
						c102350_f1p0	Unique	c126075_f4p13
						c102370_f14p34	Unique	c126360_f2p0
						c102400_f1p3	Unique	c126399_f2p1
						c102436_f1p0	Unique	c126420_f2p13
						c102475_f1p2	Unique	c126430_f2p1
						c102522_f4p17	Unique	c126474_f2p1
						c102648_f1p0	Unique	c126505_f4p7
						c102670_f1p2	Unique	c126587_f2p3
						c102736_f2p0	Unique	c126627_f1p0
						c102757_f1p2	Unique	c126764_f1p5
						c102795_f1p5	Unique	c126781_f1p1
						c102798_f1p8	Unique	c12761_f1p3
						c102976_f2p9	Unique	c12778_f2p0
						c103028_f1p2	Unique	c127781_f1p4
						c103165_f1p4	Unique	c127787_f1p9
						c103233_f1p5	Unique	c128063_f1p3
						c10326_f1p1	Unique	c128391_f1p5
						c10338_f1p2	Unique	c129022_f1p20
						c103398_f1p3	Unique	c129344_f1p2
						c103461_f1p0	Unique	c129367_f1p8
						c103618_f1p5	Unique	c129382_f1p1
						c103619_f1p2	Unique	c129492_f1p1
						c103661_f1p8	Unique	c129521_f1p1
						c103680_f1p2	Unique	c129668_f3p0
						c103697_f1p0	Unique	c130644_f1p1
						c103701_f1p0	Unique	c131032_f1p0
						c103732_f1p2	Unique	c131567_f1p4
						c103793_f1p0	Unique	c131662_f2p0
						c103873_f1p1	Unique	c131794_f1p0
						c103875_f1p1	Unique	c131885_f1p2
						c103999_f1p0	Unique	c132231_f1p26
						c104002_f1p1	Unique	c132392_f1p0
						c104009_f4p12	Unique	c132555_f1p0
						c10401_f225p46	Unique	c133514_f1p13
						c104014_f1p4	Unique	c133597_f1p3
						c104077_f1p1	Unique	c133659_f2p10
						c104096_f1p0	Unique	c133894_f1p6
						c104098_f1p1	Unique	c134261_f1p0
						c104129_f1p0	Unique	c134541_f1p3
						c104204_f1p3	Unique	c134713_f2p4
						c104206_f1p1	Unique	c136476_f1p4
						c104292_f1p1	Unique	c136611_f1p0
						c104330_f1p0	Unique	c136665_f1p2
						c104502_f1p10	Unique	c136926_f1p0
						c104511_f1p3	Unique	c13732_f1p11
						c104551_f1p0	Unique	c137916_f2p4
						c104576_f1p1	Unique	c138066_f1p4
						c104580_f1p1	Unique	c138141_f1p3
						c104583_f1p1	Unique	c1386_f5p1
						c104588_f11p14	Unique	c139070_f2p0
						c104629_f1p4	Unique	c143872_f1p3
						c10464_f3p14	Unique	c150409_f1p88
						c104748_f1p0	Unique	c1521_f2p4
						c10482_f1p0	Unique	c152948_f1p1
						c104935_f1p3	Unique	c159434_f5p18
						c10495_f1p3	Unique	c159848_f6p5
						c104984_f2p3	Unique	c159921_f9p12
						c105152_f1p0	Unique	c160256_f1p8
						c105278_f1p0	Unique	c161440_f1p4
						c105305_f1p1	Unique	c161521_f1p0
						c105373_f1p3	Unique	c161546_f1p0
						c105416_f1p0	Unique	c161600_f1p9
						c105432_f1p1	Unique	c162313_f1p0
						c105473_f1p0	Unique	c162799_f4p5
						c10551_f1p0	Unique	c163266_f1p2
						c10556_f1p6	Unique	c163312_f1p6
						c105606_f1p0	Unique	c163784_f1p0
						c105683_f1p1	Unique	c163903_f1p2
						c105686_f1p20	Unique	c164212_f18p5
						c105690_f1p0	Unique	c164540_f1p1
						c105765_f2p1	Unique	c164661_f2p1
						c105773_f1p1	Unique	c164703_f1p4
						c105785_f1p1	Unique	c165226_f1p4
						c1058_f5p2	Unique	c1661_f1p6
						c105870_f1p9	Unique	c166918_f1p1
						c105904_f1p2	Unique	c166972_f1p0
						c10591_f1p0	Unique	c168310_f1p0
						c105910_f1p1	Unique	c168371_f1p4
						c105972_f1p3	Unique	c168377_f1p0
						c1060_f7p2	Unique	c168559_f1p2
						c106086_f4p7	Unique	c168703_f1p0
						c106099_f1p1	Unique	c169114_f1p6
						c106176_f3p6	Unique	c169364_f1p4
						c106302_f1p0	Unique	c170032_f15p31
						c106303_f1p1	Unique	c170901_f2p1
						c106312_f5p16	Unique	c1726_f2p1
						c106388_f3p2	Unique	c172811_f1p2
						c106485_f1p3	Unique	c173758_f4p2
						c106488_f1p23	Unique	c175512_f4p2
						c106492_f1p0	Unique	c176792_f4p1
						c106510_f1p2	Unique	c177508_f6p5
						c10676_f1p1	Unique	c1783_f2p0
						c107013_f1p14	Unique	c184037_f15p7
						c107473_f6p10	Unique	c185009_f2p2
						c10749_f1p2	Unique	c1863_f3p1
						c10776_f2p1	Unique	c188324_f6p19
						c10832_f2p11	Unique	c188772_f6p6
						c10849_f1p0	Unique	c188783_f39p25
						c10934_f1p4	Unique	c188785_f27p5
						c10969_f1p4	Unique	c188858_f3p2
						c1098_f10p2	Unique	c188888_f1p1
						c109805_f1p2	Unique	c188925_f4p2
						c110080_f1p1	Unique	c189055_f3p3
						c11058_f1p1	Unique	c189103_f4p23
						c110679_f4p6	Unique	c189330_f13p0
						c11142_f1p0	Unique	c189421_f4p0
						c11154_f2p4	Unique	c189422_f2p2
						c11192_f3p2	Unique	c189456_f2p2
						c11264_f1p0	Unique	c192146_f8p4
						c11267_f1p0	Unique	c1947_f8p6
						c1133_f5p3	Unique	c1987_f2p2
						c1135_f4p2	Unique	c202568_f10p4
						c11353_f1p2	Unique	c204174_f1p0
						c11479_f1p0	Unique	c204190_f1p0
						c11538_f3p2	Unique	c204247_f1p5
						c116140_f7p12	Unique	c204645_f1p2
						c1162_f4p3	Unique	c204752_f1p3
						c1163_f4p9	Unique	c204892_f1p6
						c1164_f6p0	Unique	c205142_f1p5
						c1174_f7p1	Unique	c205216_f1p1
						c117756_f2p3	Unique	c205365_f1p3
						c117982_f2p2	Unique	c205761_f1p5
						c11837_f2p0	Unique	c205951_f1p1
						c12056_f1p1	Unique	c206168_f1p0
						c121046_f20p23	Unique	c206196_f1p1
						c12161_f1p7	Unique	c206307_f1p1
						c1251_f3p2	Unique	c206414_f1p0
						c125223_f99p35	Unique	c206509_f1p4
						c125277_f10p9	Unique	c206622_f1p1
						c125335_f10p6	Unique	c206869_f1p0
						c125415_f71p15	Unique	c206912_f1p1
						c125419_f10p7	Unique	c207020_f1p5
						c125542_f20p9	Unique	c207165_f1p2
						c125600_f52p16	Unique	c207391_f1p5
						c125784_f5p29	Unique	c207509_f1p1
						c125812_f5p5	Unique	c2131_f2p1
						c125830_f4p3	Unique	c2151_f2p2
						c125845_f3p0	Unique	c2239_f3p1
						c125853_f3p0	Unique	c2642_f1p4
						c125857_f3p5	Unique	c27212_f13p7
						c125901_f3p2	Unique	c27301_f25p5
						c125921_f4p4	Unique	c27320_f5p1
						c125928_f14p17	Unique	c27371_f11p4
						c125934_f6p11	Unique	c27500_f5p2
						c125952_f4p1	Unique	c27502_f16p8
						c125981_f2p4	Unique	c27562_f10p5
						c126024_f2p6	Unique	c27759_f11p9
						c126051_f2p1	Unique	c27775_f9p3
						c126067_f4p6	Unique	c27797_f6p5
						c126073_f3p40	Unique	c27850_f9p8
						c126113_f4p0	Unique	c28006_f3p8
						c126124_f2p0	Unique	c28023_f5p6
						c126158_f2p0	Unique	c28025_f4p5
						c126191_f2p4	Unique	c28031_f2p2
						c126222_f2p1	Unique	c2804_f1p1
						c126236_f3p4	Unique	c28093_f5p4
						c126245_f2p1	Unique	c28172_f3p1
						c126330_f2p1	Unique	c28457_f6p0
						c126341_f2p8	Unique	c28515_f9p3
						c126346_f2p4	Unique	c28662_f4p4
						c126355_f2p0	Unique	c28666_f7p12
						c126439_f3p5	Unique	c28732_f6p2
						c126464_f3p6	Unique	c28837_f2p0
						c126465_f2p4	Unique	c28960_f1p0
						c126469_f3p7	Unique	c28961_f1p1
						c12647_f1p1	Unique	c29051_f1p22
						c126470_f7p5	Unique	c29176_f6p17
						c126473_f3p1	Unique	c29314_f2p1
						c126510_f2p1	Unique	c29563_f1p2
						c126519_f2p0	Unique	c29584_f2p3
						c126528_f4p8	Unique	c29641_f1p2
						c126534_f2p2	Unique	c29706_f1p3
						c126543_f2p3	Unique	c29879_f1p0
						c126581_f2p0	Unique	c30206_f1p0
						c126586_f2p1	Unique	c30479_f3p2
						c126637_f1p9	Unique	c30510_f9p1
						c12668_f1p1	Unique	c30947_f6p4
						c1267_f4p2	Unique	c30975_f1p0
						c126785_f2p1	Unique	c31007_f2p2
						c12679_f2p0	Unique	c31167_f7p7
						c126790_f1p1	Unique	c31230_f1p3
						c126843_f1p1	Unique	c31385_f1p0
						c126874_f1p0	Unique	c3160_f4p4
						c127050_f1p2	Unique	c31668_f1p1
						c127152_f2p2	Unique	c32055_f1p3
						c127216_f1p1	Unique	c32226_f1p0
						c127218_f1p0	Unique	c32284_f1p2
						c127301_f1p0	Unique	c32320_f1p0
						c127318_f1p2	Unique	c32382_f1p4
						c127380_f2p2	Unique	c32400_f1p3
						c127410_f2p0	Unique	c32492_f1p35
						c127520_f2p2	Unique	c32514_f1p0
						c127592_f1p1	Unique	c32543_f5p2
						c127748_f1p4	Unique	c32658_f6p3
						c127863_f1p1	Unique	c33211_f3p1
						c12796_f1p2	Unique	c33623_f1p1
						c128000_f1p0	Unique	c33639_f1p0
						c128121_f1p1	Unique	c33673_f1p3
						c128267_f1p2	Unique	c34018_f4p2
						c128398_f3p8	Unique	c34243_f2p0
						c128508_f1p3	Unique	c34270_f2p1
						c128538_f1p2	Unique	c34458_f1p0
						c128563_f1p0	Unique	c34707_f4p7
						c128566_f1p0	Unique	c34763_f1p1
						c128584_f1p5	Unique	c35082_f1p1
						c128638_f1p1	Unique	c35220_f4p2
						c128666_f1p1	Unique	c35342_f2p3
						c128744_f1p6	Unique	c35449_f8p6
						c128799_f1p1	Unique	c35615_f1p0
						c12884_f19p15	Unique	c3567_f1p0
						c128884_f1p1	Unique	c35748_f3p7
						c129037_f1p0	Unique	c35790_f2p1
						c129078_f1p3	Unique	c35858_f2p0
						c129117_f1p0	Unique	c35932_f2p1
						c129144_f1p1	Unique	c36009_f1p1
						c129148_f1p0	Unique	c36028_f1p0
						c129189_f1p6	Unique	c36121_f2p0
						c129294_f1p0	Unique	c36195_f1p0
						c129358_f1p3	Unique	c36238_f1p3
						c129390_f1p1	Unique	c36319_f5p6
						c129436_f2p0	Unique	c36514_f1p0
						c129444_f1p1	Unique	c36738_f1p1
						c12946_f1p0	Unique	c36810_f1p1
						c129507_f1p2	Unique	c37157_f1p0
						c129528_f1p2	Unique	c37226_f1p2
						c129572_f1p0	Unique	c3726_f1p1
						c129595_f1p4	Unique	c37718_f2p1
						c1296_f3p0	Unique	c3780_f6p1
						c129618_f2p0	Unique	c37999_f1p1
						c129638_f1p3	Unique	c3809_f2p0
						c12966_f6p2	Unique	c38096_f1p3
						c129692_f1p14	Unique	c38176_f1p0
						c129695_f1p0	Unique	c38298_f1p6
						c12973_f1p1	Unique	c383_f32p8
						c129734_f1p0	Unique	c38331_f1p4
						c129835_f1p1	Unique	c39260_f3p1
						c129877_f1p4	Unique	c39496_f1p5
						c129880_f1p0	Unique	c39507_f2p3
						c129954_f2p3	Unique	c39643_f4p3
						c129987_f1p5	Unique	c39804_f1p1
						c130004_f2p1	Unique	c39830_f1p1
						c130007_f1p1	Unique	c39933_f2p0
						c130030_f1p1	Unique	c40018_f2p0
						c130074_f1p0	Unique	c40135_f1p0
						c130091_f1p0	Unique	c40143_f3p0
						c130137_f1p7	Unique	c41079_f1p3
						c130160_f1p3	Unique	c41323_f1p3
						c130164_f1p0	Unique	c41655_f1p1
						c130249_f1p2	Unique	c41691_f1p1
						c130272_f1p5	Unique	c41751_f8p2
						c130443_f1p2	Unique	c41899_f2p0
						c130567_f1p2	Unique	c41922_f3p7
						c130625_f1p3	Unique	c42005_f1p1
						c130705_f1p1	Unique	c42023_f1p6
						c130732_f1p2	Unique	c42157_f3p0
						c130752_f1p5	Unique	c42794_f5p14
						c13082_f3p3	Unique	c42799_f51p38
						c130821_f4p2	Unique	c4376_f1p1
						c130853_f1p7	Unique	c4408_f1p0
						c130866_f1p3	Unique	c448_f5p10
						c130867_f1p6	Unique	c4490_f1p0
						c13091_f1p2	Unique	c452_f24p10
						c130932_f1p3	Unique	c4559_f1p0
						c130982_f1p1	Unique	c461_f14p3
						c131074_f1p1	Unique	c4688_f1p0
						c131153_f1p6	Unique	c4766_f1p5
						c13122_f1p0	Unique	c4908_f1p1
						c131385_f1p0	Unique	c5466_f1p1
						c131389_f1p4	Unique	c5528_f1p1
						c131420_f1p6	Unique	c556_f4p9
						c131498_f1p1	Unique	c570_f20p2
						c131506_f1p0	Unique	c579_f9p2
						c131519_f1p2	Unique	c60471_f5p17
						c131522_f1p3	Unique	c60726_f5p7
						c131528_f1p1	Unique	c60825_f2p2
						c131604_f2p2	Unique	c60852_f2p1
						c131694_f1p7	Unique	c60874_f6p0
						c131764_f1p1	Unique	c60929_f2p1
						c131808_f1p1	Unique	c61002_f4p3
						c131934_f1p0	Unique	c61103_f2p4
						c131937_f3p2	Unique	c61233_f4p2
						c131966_f1p1	Unique	c61320_f7p1
						c1320_f13p3	Unique	c61401_f3p2
						c132044_f4p4	Unique	c61481_f1p0
						c132189_f1p3	Unique	c62137_f3p4
						c132229_f1p3	Unique	c62162_f1p6
						c132253_f1p3	Unique	c62783_f1p2
						c132289_f1p4	Unique	c62998_f1p2
						c132307_f1p2	Unique	c63012_f1p2
						c132420_f1p1	Unique	c63214_f1p2
						c1326_f2p5	Unique	c63509_f1p1
						c132608_f1p1	Unique	c63705_f1p1
						c132655_f1p0	Unique	c64105_f1p0
						c132666_f1p0	Unique	c64138_f1p0
						c132691_f2p2	Unique	c64178_f2p0
						c132698_f1p1	Unique	c64483_f3p2
						c132758_f1p2	Unique	c64885_f1p0
						c132789_f1p0	Unique	c64933_f2p0
						c132810_f1p0	Unique	c65073_f1p0
						c132851_f1p1	Unique	c65291_f1p0
						c132941_f1p4	Unique	c65403_f1p1
						c132975_f1p1	Unique	c65651_f1p0
						c132986_f1p4	Unique	c65897_f1p0
						c132989_f1p1	Unique	c65914_f2p6
						c133068_f1p5	Unique	c66145_f2p8
						c133113_f1p4	Unique	c66195_f1p0
						c133114_f4p2	Unique	c66300_f1p2
						c133249_f1p0	Unique	c66801_f1p3
						c133254_f1p5	Unique	c66841_f4p1
						c133287_f1p1	Unique	c66941_f1p0
						c133293_f1p1	Unique	c66943_f2p1
						c133348_f1p6	Unique	c67053_f3p2
						c133452_f2p2	Unique	c67607_f1p1
						c133550_f1p2	Unique	c6771_f1p1
						c133564_f1p0	Unique	c6777_f3p0
						c133675_f1p0	Unique	c67890_f1p0
						c133763_f1p6	Unique	c68525_f1p1
						c133765_f2p2	Unique	c6868_f5p4
						c1338_f3p1	Unique	c68684_f1p2
						c133815_f1p14	Unique	c68812_f1p2
						c133856_f1p2	Unique	c68955_f2p5
						c133891_f1p0	Unique	c69016_f2p1
						c133908_f1p3	Unique	c69033_f2p1
						c133952_f1p0	Unique	c69278_f2p4
						c133963_f1p4	Unique	c69782_f2p0
						c134003_f1p1	Unique	c69909_f1p3
						c134029_f1p0	Unique	c70205_f1p0
						c134152_f1p0	Unique	c70313_f1p0
						c134165_f1p9	Unique	c705_f8p4
						c134212_f1p20	Unique	c70523_f1p1
						c134226_f1p2	Unique	c70747_f1p1
						c134228_f1p0	Unique	c7108_f1p2
						c134326_f1p8	Unique	c71138_f1p2
						c134384_f2p0	Unique	c71169_f1p1
						c134386_f1p0	Unique	c71294_f1p1
						c134420_f1p1	Unique	c71311_f1p0
						c134489_f1p0	Unique	c71489_f1p1
						c134574_f1p2	Unique	c71627_f1p6
						c134577_f1p2	Unique	c71666_f3p10
						c134672_f1p1	Unique	c71995_f1p1
						c134782_f1p0	Unique	c72366_f1p0
						c134850_f1p2	Unique	c72591_f1p1
						c1349_f4p33	Unique	c72717_f2p6
						c134979_f1p1	Unique	c72735_f1p0
						c135063_f1p4	Unique	c73006_f1p1
						c135166_f1p9	Unique	c73235_f1p0
						c135308_f1p1	Unique	c73393_f1p1
						c135344_f1p1	Unique	c73562_f1p1
						c135351_f1p0	Unique	c73765_f1p4
						c135384_f1p8	Unique	c7531_f1p0
						c135425_f1p9	Unique	c755_f17p7
						c135550_f1p1	Unique	c766_f10p8
						c135596_f1p1	Unique	c7894_f1p4
						c135638_f1p5	Unique	c8178_f5p2
						c135699_f1p0	Unique	c825_f9p3
						c135775_f1p0	Unique	c8266_f1p1
						c135879_f1p2	Unique	c845_f12p4
						c136022_f1p0	Unique	c859_f8p1
						c136088_f1p2	Unique	c9152_f2p1
						c136202_f1p0	Unique	c9241_f1p0
						c136334_f1p1	Unique	c92563_f5p5
						c136414_f1p3	Unique	c92707_f43p25
						c136452_f1p4	Unique	c92957_f4p2
						c136482_f1p2	Unique	c92983_f5p4
						c136483_f1p5	Unique	c93031_f3p0
						c136493_f1p0	Unique	c93032_f2p1
						c136533_f1p0	Unique	c93101_f2p0
						c136543_f1p0	Unique	c93218_f2p1
						c136625_f1p3	Unique	c93283_f2p0
						c136634_f1p5	Unique	c93291_f6p4
						c136656_f1p0	Unique	c935_f5p1
						c136690_f1p1	Unique	c93530_f1p1
						c136722_f1p3	Unique	c93640_f1p0
						c136792_f1p0	Unique	c93686_f1p12
						c136796_f1p3	Unique	c93717_f1p1
						c136876_f2p0	Unique	c94209_f1p0
						c137090_f1p1	Unique	c94359_f2p3
						c137121_f4p3	Unique	c94682_f1p3
						c137156_f1p0	Unique	c94826_f1p0
						c137185_f1p4	Unique	c95741_f1p3
						c137229_f1p2	Unique	c96094_f1p2
						c137233_f1p4	Unique	c96271_f1p0
						c137236_f1p6	Unique	c96494_f1p8
						c137256_f1p3	Unique	c96683_f1p2
						c137264_f1p3	Unique	c96883_f1p0
						c137290_f2p7	Unique	c96884_f2p0
						c137351_f1p3	Unique	c974_f3p7
						c137383_f1p0	Unique	c97611_f1p2
						c137427_f1p6	Unique	c9775_f1p0
						c137491_f1p3	Unique	c98280_f2p0
						c137526_f1p2	Unique	c984_f7p6
						c137585_f1p5	Unique	c98429_f1p0
						c137647_f2p0	Unique	c98740_f1p1
						c137710_f1p3	Unique	c98900_f1p0
						c137795_f2p3	Unique	c98923_f1p6
						c137837_f1p0	Unique	c98987_f1p0
						c137889_f1p1	Unique	c990_f7p1
						c137919_f1p3	Unique	c99102_f1p1
						c137984_f1p1	Unique	c99262_f1p2
						c138042_f1p1	Unique	c99370_f1p1
						c138107_f1p3	Unique
						c138214_f1p0	Unique
						c138301_f1p3	Unique
						c138397_f1p13	Unique
						c138467_f1p0	Unique
						c138570_f2p0	Unique
						c138691_f1p0	Unique
						c138707_f1p8	Unique
						c138787_f1p1	Unique
						c138834_f2p0	Unique
						c1389_f5p5	Unique
						c138905_f1p0	Unique
						c1390_f8p3	Unique
						c139002_f1p2	Unique
						c139151_f1p2	Unique
						c139213_f1p0	Unique
						c139229_f1p0	Unique
						c139231_f1p4	Unique
						c139282_f1p10	Unique
						c139405_f1p0	Unique
						c139430_f1p2	Unique
						c139522_f1p9	Unique
						c139711_f1p0	Unique
						c139882_f1p1	Unique
						c139909_f1p7	Unique
						c140049_f1p5	Unique
						c140075_f1p0	Unique
						c140098_f1p0	Unique
						c140174_f1p4	Unique
						c140203_f1p0	Unique
						c140280_f1p0	Unique
						c140371_f1p0	Unique
						c140409_f1p1	Unique
						c140436_f1p0	Unique
						c140505_f1p1	Unique
						c140592_f1p2	Unique
						c140704_f1p1	Unique
						c140776_f2p7	Unique
						c141012_f3p3	Unique
						c1411_f2p0	Unique
						c142365_f4p0	Unique
						c142848_f3p9	Unique
						c143358_f2p0	Unique
						c1435_f2p0	Unique
						c1444_f3p2	Unique
						c144682_f5p4	Unique
						c145051_f12p3	Unique
						c145105_f3p10	Unique
						c1453_f5p2	Unique
						c1492_f5p2	Unique
						c157126_f3p3	Unique
						c159824_f15p4	Unique
						c159843_f7p3	Unique
						c159905_f69p14	Unique
						c15994_f8p3	Unique
						c159998_f4p5	Unique
						c1600_f3p4	Unique
						c160007_f4p4	Unique
						c160076_f5p0	Unique
						c160192_f1p4	Unique
						c160276_f7p11	Unique
						c160283_f2p6	Unique
						c1603_f3p0	Unique
						c160326_f1p1	Unique
						c160340_f34p12	Unique
						c160488_f1p3	Unique
						c1605_f2p0	Unique
						c160598_f2p4	Unique
						c160599_f2p2	Unique
						c160611_f3p12	Unique
						c160631_f2p0	Unique
						c160649_f2p3	Unique
						c160671_f2p3	Unique
						c160684_f2p0	Unique
						c160685_f5p12	Unique
						c160762_f3p2	Unique
						c160839_f1p4	Unique
						c160845_f2p1	Unique
						c160900_f1p10	Unique
						c160982_f1p1	Unique
						c161025_f1p1	Unique
						c161117_f1p2	Unique
						c161139_f1p0	Unique
						c161178_f1p3	Unique
						c161281_f1p0	Unique
						c161347_f1p2	Unique
						c161435_f1p2	Unique
						c161451_f1p0	Unique
						c161937_f1p6	Unique
						c162028_f3p6	Unique
						c162074_f1p0	Unique
						c162079_f1p4	Unique
						c162149_f1p0	Unique
						c162247_f1p1	Unique
						c162286_f2p7	Unique
						c162330_f1p1	Unique
						c162343_f1p6	Unique
						c162373_f1p8	Unique
						c162393_f1p0	Unique
						c162707_f1p4	Unique
						c162746_f1p0	Unique
						c162769_f1p0	Unique
						c162880_f1p7	Unique
						c162895_f1p1	Unique
						c162978_f1p0	Unique
						c163202_f1p1	Unique
						c163206_f1p8	Unique
						c163310_f1p9	Unique
						c163494_f1p2	Unique
						c163518_f1p0	Unique
						c163538_f1p2	Unique
						c163547_f1p8	Unique
						c163560_f1p2	Unique
						c163723_f1p8	Unique
						c163733_f1p2	Unique
						c163961_f1p0	Unique
						c164016_f1p0	Unique
						c164117_f1p0	Unique
						c164176_f1p0	Unique
						c164238_f1p12	Unique
						c164298_f1p2	Unique
						c164420_f1p7	Unique
						c164428_f1p3	Unique
						c164488_f1p0	Unique
						c164608_f1p1	Unique
						c164656_f1p2	Unique
						c164727_f1p4	Unique
						c164762_f1p0	Unique
						c164800_f1p2	Unique
						c164802_f1p3	Unique
						c164839_f1p4	Unique
						c164890_f1p7	Unique
						c165180_f1p1	Unique
						c165221_f1p0	Unique
						c165533_f1p0	Unique
						c165610_f1p5	Unique
						c165678_f1p3	Unique
						c165726_f1p2	Unique
						c165737_f1p7	Unique
						c165850_f1p3	Unique
						c166016_f1p0	Unique
						c166040_f1p0	Unique
						c166093_f1p1	Unique
						c166108_f1p2	Unique
						c166290_f1p0	Unique
						c166338_f1p5	Unique
						c166357_f1p0	Unique
						c166487_f1p1	Unique
						c166677_f1p3	Unique
						c166680_f1p23	Unique
						c166688_f1p3	Unique
						c166715_f1p0	Unique
						c166800_f1p0	Unique
						c166815_f1p3	Unique
						c166968_f1p1	Unique
						c167006_f1p0	Unique
						c167023_f1p3	Unique
						c167150_f1p0	Unique
						c167269_f1p3	Unique
						c167281_f1p6	Unique
						c167337_f1p0	Unique
						c167518_f1p1	Unique
						c167578_f1p5	Unique
						c167580_f1p2	Unique
						c167674_f1p0	Unique
						c167737_f1p2	Unique
						c167809_f1p6	Unique
						c167871_f1p2	Unique
						c167887_f1p0	Unique
						c168049_f1p2	Unique
						c168101_f1p0	Unique
						c168134_f5p12	Unique
						c168226_f1p2	Unique
						c168327_f1p0	Unique
						c168627_f1p0	Unique
						c168634_f1p9	Unique
						c168668_f1p5	Unique
						c168709_f1p2	Unique
						c168834_f1p4	Unique
						c168848_f1p1	Unique
						c168930_f1p3	Unique
						c169043_f1p0	Unique
						c169046_f1p0	Unique
						c169121_f3p20	Unique
						c169175_f1p6	Unique
						c169345_f1p8	Unique
						c169374_f1p2	Unique
						c169397_f1p1	Unique
						c169610_f1p1	Unique
						c169620_f1p0	Unique
						c169623_f1p1	Unique
						c169716_f1p1	Unique
						c169744_f1p6	Unique
						c169778_f1p3	Unique
						c170_f3p7	Unique
						c170044_f1p1	Unique
						c170063_f4p0	Unique
						c1713_f1p46	Unique
						c1725_f3p0	Unique
						c173279_f2p3	Unique
						c173546_f2p0	Unique
						c173690_f3p3	Unique
						c173888_f21p10	Unique
						c173891_f7p4	Unique
						c173905_f2p4	Unique
						c173969_f1p5	Unique
						c1744_f16p5	Unique
						c175663_f2p5	Unique
						c1757_f2p1	Unique
						c175816_f1p9	Unique
						c1760_f2p1	Unique
						c1766_f2p3	Unique
						c1768_f3p3	Unique
						c177648_f19p13	Unique
						c179077_f4p10	Unique
						c180220_f2p1	Unique
						c1807_f2p0	Unique
						c181347_f2p6	Unique
						c181369_f2p3	Unique
						c181390_f3p8	Unique
						c1816_f3p9	Unique
						c1817_f2p0	Unique
						c182066_f1p8	Unique
						c18278_f12p8	Unique
						c1836_f2p0	Unique
						c184122_f2p2	Unique
						c184994_f1p7	Unique
						c185022_f10p15	Unique
						c185029_f1p21	Unique
						c185039_f3p9	Unique
						c185052_f1p17	Unique
						c185053_f8p12	Unique
						c185071_f2p0	Unique
						c185252_f8p3	Unique
						c185547_f12p28	Unique
						c185939_f4p9	Unique
						c186634_f2p0	Unique
						c188533_f1p1	Unique
						c188711_f29p20	Unique
						c188713_f1p3	Unique
						c188728_f2p1	Unique
						c188735_f53p18	Unique
						c188742_f5p7	Unique
						c188838_f5p2	Unique
						c188839_f1p16	Unique
						c188911_f4p4	Unique
						c188928_f5p0	Unique
						c188935_f3p4	Unique
						c188944_f6p9	Unique
						c188952_f11p3	Unique
						c188978_f2p2	Unique
						c189008_f4p5	Unique
						c189010_f187p36	Unique
						c189014_f10p6	Unique
						c189030_f8p3	Unique
						c189048_f5p2	Unique
						c189052_f1p6	Unique
						c189057_f4p5	Unique
						c189060_f3p1	Unique
						c189071_f1p3	Unique
						c189097_f6p5	Unique
						c189155_f2p3	Unique
						c189160_f2p5	Unique
						c189205_f7p6	Unique
						c189206_f1p4	Unique
						c189213_f1p4	Unique
						c189244_f4p10	Unique
						c189280_f47p10	Unique
						c189290_f16p3	Unique
						c189302_f9p1	Unique
						c189326_f5p3	Unique
						c189342_f4p1	Unique
						c189345_f2p1	Unique
						c189349_f1p4	Unique
						c189389_f5p7	Unique
						c189442_f2p1	Unique
						c189446_f3p3	Unique
						c189447_f9p6	Unique
						c189480_f7p6	Unique
						c189491_f13p6	Unique
						c190625_f3p5	Unique
						c191445_f2p2	Unique
						c191579_f3p4	Unique
						c1919_f2p1	Unique
						c192793_f2p2	Unique
						c192797_f7p6	Unique
						c193239_f11p5	Unique
						c193267_f2p4	Unique
						c194812_f2p2	Unique
						c1950_f2p27	Unique
						c195083_f8p7	Unique
						c1951_f2p2	Unique
						c196805_f18p7	Unique
						c196818_f3p4	Unique
						c196822_f9p4	Unique
						c196860_f8p4	Unique
						c197623_f11p3	Unique
						c200457_f5p4	Unique
						c200470_f3p5	Unique
						c2020_f2p1	Unique
						c202491_f1p0	Unique
						c203069_f4p1	Unique
						c2036_f2p0	Unique
						c2040_f2p1	Unique
						c204119_f1p0	Unique
						c204146_f1p2	Unique
						c204194_f1p1	Unique
						c204201_f1p0	Unique
						c204225_f1p2	Unique
						c204260_f1p1	Unique
						c204279_f1p0	Unique
						c204327_f1p1	Unique
						c204385_f1p3	Unique
						c204468_f1p0	Unique
						c204486_f1p1	Unique
						c204532_f1p5	Unique
						c204544_f1p25	Unique
						c204561_f1p3	Unique
						c204571_f1p2	Unique
						c204591_f1p1	Unique
						c204601_f1p0	Unique
						c204644_f1p2	Unique
						c204684_f1p0	Unique
						c204713_f1p0	Unique
						c204772_f1p0	Unique
						c204801_f1p0	Unique
						c204806_f1p10	Unique
						c204872_f1p1	Unique
						c2049_f3p0	Unique
						c204933_f1p2	Unique
						c204938_f1p1	Unique
						c204960_f1p2	Unique
						c204983_f1p2	Unique
						c205122_f1p1	Unique
						c205177_f1p2	Unique
						c205220_f1p0	Unique
						c205338_f1p1	Unique
						c205410_f1p1	Unique
						c205412_f1p3	Unique
						c205423_f1p0	Unique
						c205458_f1p1	Unique
						c205648_f1p0	Unique
						c205727_f1p2	Unique
						c205758_f1p3	Unique
						c205768_f1p0	Unique
						c205772_f1p1	Unique
						c205828_f1p0	Unique
						c205829_f1p1	Unique
						c206028_f1p0	Unique
						c206030_f1p3	Unique
						c206085_f1p0	Unique
						c206105_f1p2	Unique
						c206116_f1p0	Unique
						c206197_f1p0	Unique
						c206215_f1p1	Unique
						c206224_f1p1	Unique
						c206256_f1p0	Unique
						c206291_f1p0	Unique
						c206330_f1p0	Unique
						c206331_f1p1	Unique
						c206371_f1p1	Unique
						c206393_f1p9	Unique
						c206516_f1p0	Unique
						c206548_f1p2	Unique
						c206558_f1p2	Unique
						c206621_f1p1	Unique
						c206724_f1p0	Unique
						c206730_f1p0	Unique
						c206734_f1p3	Unique
						c206810_f1p0	Unique
						c206839_f1p4	Unique
						c206867_f1p2	Unique
						c206872_f1p2	Unique
						c206875_f1p0	Unique
						c206904_f1p0	Unique
						c206923_f1p1	Unique
						c207062_f1p2	Unique
						c207091_f1p2	Unique
						c207105_f1p2	Unique
						c207166_f1p0	Unique
						c207173_f1p0	Unique
						c207235_f1p3	Unique
						c207269_f1p2	Unique
						c207293_f1p1	Unique
						c207314_f1p0	Unique
						c20734_f2p0	Unique
						c207347_f1p2	Unique
						c207387_f1p0	Unique
						c207406_f1p1	Unique
						c207467_f1p0	Unique
						c207514_f1p2	Unique
						c207515_f1p1	Unique
						c207531_f1p1	Unique
						c207539_f1p4	Unique
						c207563_f1p0	Unique
						c2078_f2p4	Unique
						c2089_f1p2	Unique
						c2091_f2p0	Unique
						c2118_f2p3	Unique
						c2326_f1p0	Unique
						c2330_f1p0	Unique
						c2377_f1p2	Unique
						c2457_f1p1	Unique
						c2481_f2p2	Unique
						c2519_f1p0	Unique
						c2547_f1p0	Unique
						c2557_f1p2	Unique
						c2604_f1p2	Unique
						c2679_f3p1	Unique
						c26861_f52p26	Unique
						c26868_f13p18	Unique
						c26919_f4p4	Unique
						c26930_f4p6	Unique
						c26986_f31p10	Unique
						c26989_f75p27	Unique
						c26990_f13p5	Unique
						c27017_f65p18	Unique
						c27047_f14p15	Unique
						c27087_f46p20	Unique
						c27093_f45p13	Unique
						c27201_f44p22	Unique
						c27217_f18p6	Unique
						c27228_f28p7	Unique
						c27256_f38p5	Unique
						c27292_f11p16	Unique
						c27329_f15p11	Unique
						c27374_f9p4	Unique
						c27375_f9p9	Unique
						c27381_f7p3	Unique
						c27397_f16p12	Unique
						c27402_f14p13	Unique
						c27404_f1p4	Unique
						c27421_f18p5	Unique
						c27433_f11p10	Unique
						c2744_f1p17	Unique
						c27441_f11p3	Unique
						c27447_f8p8	Unique
						c27457_f9p9	Unique
						c27461_f6p6	Unique
						c27483_f10p6	Unique
						c27508_f22p38	Unique
						c27513_f6p2	Unique
						c27545_f6p9	Unique
						c27550_f6p2	Unique
						c2756_f1p1	Unique
						c27569_f10p5	Unique
						c27580_f12p13	Unique
						c27611_f8p1	Unique
						c27621_f9p3	Unique
						c27623_f8p2	Unique
						c27641_f10p4	Unique
						c27646_f8p4	Unique
						c27682_f4p3	Unique
						c27698_f8p44	Unique
						c27723_f5p0	Unique
						c27742_f4p1	Unique
						c27756_f7p3	Unique
						c27794_f7p2	Unique
						c27804_f10p4	Unique
						c27820_f7p2	Unique
						c2791_f1p0	Unique
						c27934_f2p4	Unique
						c27940_f3p6	Unique
						c27975_f2p4	Unique
						c27993_f2p1	Unique
						c27998_f3p3	Unique
						c28003_f2p0	Unique
						c28015_f5p11	Unique
						c28026_f13p3	Unique
						c28091_f4p1	Unique
						c28119_f7p6	Unique
						c28136_f4p3	Unique
						c28140_f9p7	Unique
						c28157_f6p5	Unique
						c28226_f8p3	Unique
						c28233_f10p2	Unique
						c28239_f7p5	Unique
						c28245_f4p4	Unique
						c28258_f7p3	Unique
						c28284_f2p0	Unique
						c28287_f10p3	Unique
						c28290_f2p3	Unique
						c28293_f2p0	Unique
						c28310_f6p8	Unique
						c28337_f1p5	Unique
						c28342_f1p3	Unique
						c28354_f4p3	Unique
						c28370_f2p3	Unique
						c28387_f3p1	Unique
						c28397_f2p0	Unique
						c28407_f3p3	Unique
						c2844_f1p3	Unique
						c28444_f2p0	Unique
						c28513_f3p5	Unique
						c28521_f10p6	Unique
						c28562_f2p0	Unique
						c28566_f2p0	Unique
						c28600_f6p0	Unique
						c28615_f4p48	Unique
						c28623_f2p0	Unique
						c28626_f8p3	Unique
						c28629_f11p12	Unique
						c28636_f2p4	Unique
						c28645_f2p3	Unique
						c28651_f4p3	Unique
						c28665_f4p2	Unique
						c28686_f2p2	Unique
						c28697_f3p0	Unique
						c28702_f6p12	Unique
						c28703_f1p7	Unique
						c28715_f7p2	Unique
						c28731_f2p0	Unique
						c28734_f3p2	Unique
						c28742_f3p1	Unique
						c28745_f5p4	Unique
						c28756_f5p4	Unique
						c28761_f3p1	Unique
						c28788_f2p0	Unique
						c28914_f1p5	Unique
						c28932_f6p3	Unique
						c28976_f1p1	Unique
						c29042_f1p6	Unique
						c29095_f1p5	Unique
						c29103_f1p4	Unique
						c29160_f2p2	Unique
						c29213_f1p0	Unique
						c29243_f1p6	Unique
						c29507_f1p3	Unique
						c2954_f2p0	Unique
						c29560_f1p1	Unique
						c29613_f1p0	Unique
						c29665_f4p14	Unique
						c29698_f1p1	Unique
						c29748_f1p6	Unique
						c29780_f5p3	Unique
						c29782_f1p0	Unique
						c29795_f1p0	Unique
						c29834_f1p11	Unique
						c29835_f2p12	Unique
						c29924_f1p0	Unique
						c29952_f1p0	Unique
						c29962_f1p1	Unique
						c29979_f2p6	Unique
						c3002_f4p2	Unique
						c30023_f3p10	Unique
						c30068_f2p5	Unique
						c30100_f1p0	Unique
						c30117_f2p3	Unique
						c30143_f2p3	Unique
						c30157_f1p3	Unique
						c30166_f2p1	Unique
						c30193_f2p2	Unique
						c30238_f4p12	Unique
						c30271_f1p1	Unique
						c30378_f1p2	Unique
						c30512_f2p3	Unique
						c30585_f2p5	Unique
						c30613_f1p4	Unique
						c30627_f1p3	Unique
						c3064_f1p3	Unique
						c30672_f1p0	Unique
						c30721_f5p7	Unique
						c30737_f1p5	Unique
						c30743_f1p0	Unique
						c30840_f1p1	Unique
						c30852_f4p3	Unique
						c30880_f11p15	Unique
						c30889_f1p2	Unique
						c30920_f3p0	Unique
						c30931_f1p0	Unique
						c30953_f1p8	Unique
						c31101_f5p4	Unique
						c31105_f4p3	Unique
						c31120_f3p4	Unique
						c31219_f1p2	Unique
						c3124_f1p0	Unique
						c31266_f2p7	Unique
						c31314_f1p2	Unique
						c31361_f1p0	Unique
						c31396_f3p1	Unique
						c31431_f2p2	Unique
						c31453_f2p5	Unique
						c31481_f1p1	Unique
						c31498_f1p7	Unique
						c31521_f1p8	Unique
						c31523_f1p0	Unique
						c31557_f2p1	Unique
						c31786_f1p0	Unique
						c31844_f3p1	Unique
						c31864_f2p2	Unique
						c31940_f1p2	Unique
						c32009_f4p1	Unique
						c32018_f2p2	Unique
						c3205_f1p1	Unique
						c32099_f1p5	Unique
						c32118_f1p4	Unique
						c32162_f1p1	Unique
						c32194_f1p7	Unique
						c32200_f1p0	Unique
						c32269_f3p2	Unique
						c32272_f1p0	Unique
						c32318_f4p2	Unique
						c32329_f1p0	Unique
						c32392_f4p1	Unique
						c32401_f1p7	Unique
						c32460_f2p6	Unique
						c32493_f1p0	Unique
						c32503_f3p1	Unique
						c32518_f1p0	Unique
						c32535_f3p5	Unique
						c32562_f1p4	Unique
						c32564_f1p2	Unique
						c32569_f1p0	Unique
						c32598_f2p0	Unique
						c32610_f1p1	Unique
						c32628_f3p3	Unique
						c32679_f1p4	Unique
						c32802_f1p8	Unique
						c32893_f3p1	Unique
						c32955_f1p19	Unique
						c32977_f3p0	Unique
						c33044_f2p1	Unique
						c33062_f3p1	Unique
						c33097_f1p0	Unique
						c33118_f1p0	Unique
						c33163_f1p1	Unique
						c33247_f1p0	Unique
						c33318_f3p1	Unique
						c3337_f2p1	Unique
						c33392_f1p2	Unique
						c33456_f2p1	Unique
						c33468_f2p0	Unique
						c33496_f2p1	Unique
						c33628_f1p4	Unique
						c33631_f1p8	Unique
						c33633_f8p2	Unique
						c33637_f1p14	Unique
						c33666_f1p2	Unique
						c33669_f1p2	Unique
						c33684_f1p1	Unique
						c33778_f1p0	Unique
						c33780_f4p1	Unique
						c33785_f2p0	Unique
						c33790_f1p0	Unique
						c33800_f2p0	Unique
						c33811_f2p1	Unique
						c33836_f1p1	Unique
						c33838_f1p4	Unique
						c33861_f3p5	Unique
						c33905_f2p1	Unique
						c33988_f3p3	Unique
						c34040_f5p13	Unique
						c34082_f2p9	Unique
						c3413_f1p1	Unique
						c34424_f1p3	Unique
						c34444_f1p0	Unique
						c34453_f1p2	Unique
						c34511_f1p1	Unique
						c34554_f1p1	Unique
						c34600_f1p0	Unique
						c34667_f5p9	Unique
						c34729_f1p2	Unique
						c34733_f3p1	Unique
						c34782_f1p2	Unique
						c34804_f1p0	Unique
						c3488_f1p0	Unique
						c34919_f1p0	Unique
						c34975_f1p1	Unique
						c35048_f1p4	Unique
						c35052_f1p0	Unique
						c351_f28p13	Unique
						c35114_f2p7	Unique
						c35150_f1p1	Unique
						c35176_f1p2	Unique
						c35289_f1p0	Unique
						c35295_f1p10	Unique
						c35327_f4p1	Unique
						c35332_f1p0	Unique
						c35337_f2p1	Unique
						c35445_f1p1	Unique
						c35465_f1p1	Unique
						c35561_f1p1	Unique
						c35572_f7p4	Unique
						c35602_f2p8	Unique
						c35618_f2p2	Unique
						c35686_f1p2	Unique
						c35751_f8p3	Unique
						c35754_f1p0	Unique
						c35814_f1p3	Unique
						c35818_f2p4	Unique
						c35826_f1p3	Unique
						c35852_f1p37	Unique
						c35884_f2p0	Unique
						c3590_f2p0	Unique
						c35926_f1p0	Unique
						c35938_f1p0	Unique
						c35980_f1p11	Unique
						c36023_f2p3	Unique
						c36056_f2p4	Unique
						c36061_f1p3	Unique
						c36079_f1p1	Unique
						c36132_f3p1	Unique
						c36167_f2p1	Unique
						c3620_f1p0	Unique
						c36200_f1p0	Unique
						c36211_f3p4	Unique
						c36228_f2p1	Unique
						c36281_f1p2	Unique
						c36376_f2p1	Unique
						c36393_f1p3	Unique
						c36426_f4p1	Unique
						c36429_f1p1	Unique
						c36456_f1p0	Unique
						c36498_f1p1	Unique
						c365_f3p6	Unique
						c36524_f1p0	Unique
						c36601_f2p4	Unique
						c3668_f1p0	Unique
						c3677_f1p4	Unique
						c36825_f5p13	Unique
						c36845_f3p5	Unique
						c36849_f1p2	Unique
						c36990_f3p5	Unique
						c36993_f1p0	Unique
						c37073_f1p0	Unique
						c37096_f1p1	Unique
						c37122_f3p1	Unique
						c37224_f1p15	Unique
						c37235_f1p1	Unique
						c37237_f11p6	Unique
						c37261_f1p1	Unique
						c37386_f3p5	Unique
						c37404_f1p2	Unique
						c37425_f2p0	Unique
						c37529_f2p1	Unique
						c37550_f1p1	Unique
						c37559_f3p1	Unique
						c37635_f8p2	Unique
						c37639_f2p1	Unique
						c37650_f1p0	Unique
						c3766_f1p1	Unique
						c37694_f1p0	Unique
						c37701_f1p0	Unique
						c37742_f1p1	Unique
						c37753_f1p1	Unique
						c37795_f2p2	Unique
						c37830_f10p2	Unique
						c37863_f1p2	Unique
						c37897_f1p1	Unique
						c37950_f1p0	Unique
						c37993_f1p1	Unique
						c37996_f1p4	Unique
						c38028_f3p2	Unique
						c38041_f1p11	Unique
						c3806_f1p2	Unique
						c3810_f1p3	Unique
						c38104_f1p1	Unique
						c38127_f1p0	Unique
						c38155_f1p0	Unique
						c38217_f1p2	Unique
						c38225_f2p0	Unique
						c38263_f1p1	Unique
						c38366_f1p4	Unique
						c38455_f1p0	Unique
						c38493_f3p5	Unique
						c38503_f5p6	Unique
						c38541_f1p1	Unique
						c38546_f1p0	Unique
						c38585_f1p3	Unique
						c38630_f3p8	Unique
						c38689_f1p1	Unique
						c3880_f1p6	Unique
						c38801_f1p1	Unique
						c38901_f2p8	Unique
						c38904_f1p2	Unique
						c38919_f1p9	Unique
						c38948_f1p6	Unique
						c38962_f1p1	Unique
						c39091_f1p1	Unique
						c39111_f3p7	Unique
						c39139_f1p3	Unique
						c39154_f1p0	Unique
						c39202_f1p7	Unique
						c39208_f1p2	Unique
						c39214_f1p0	Unique
						c3923_f1p1	Unique
						c39231_f1p6	Unique
						c39303_f1p0	Unique
						c39356_f1p6	Unique
						c39435_f1p7	Unique
						c39457_f2p7	Unique
						c39542_f1p0	Unique
						c39567_f1p0	Unique
						c39573_f2p3	Unique
						c39581_f1p0	Unique
						c39658_f1p0	Unique
						c39716_f1p1	Unique
						c39740_f1p2	Unique
						c39743_f4p1	Unique
						c39811_f3p3	Unique
						c39852_f1p0	Unique
						c39854_f1p2	Unique
						c39894_f1p5	Unique
						c39911_f1p0	Unique
						c3993_f3p0	Unique
						c39941_f1p0	Unique
						c40079_f1p4	Unique
						c40087_f1p0	Unique
						c40116_f3p2	Unique
						c40194_f2p7	Unique
						c40229_f21p24	Unique
						c40256_f1p3	Unique
						c40303_f2p1	Unique
						c40357_f1p1	Unique
						c40360_f1p0	Unique
						c4043_f1p2	Unique
						c40448_f2p0	Unique
						c40504_f1p0	Unique
						c40540_f1p2	Unique
						c40571_f1p6	Unique
						c4059_f1p1	Unique
						c40606_f1p1	Unique
						c40634_f1p0	Unique
						c40639_f1p2	Unique
						c40696_f1p2	Unique
						c40722_f1p0	Unique
						c4078_f2p0	Unique
						c40788_f4p0	Unique
						c40795_f3p2	Unique
						c40864_f1p0	Unique
						c4088_f1p5	Unique
						c40953_f1p13	Unique
						c40967_f1p5	Unique
						c41055_f1p3	Unique
						c41080_f1p1	Unique
						c41118_f1p0	Unique
						c41141_f1p3	Unique
						c41146_f1p0	Unique
						c4116_f1p0	Unique
						c41253_f3p3	Unique
						c41291_f3p0	Unique
						c41397_f1p0	Unique
						c41491_f1p0	Unique
						c41492_f1p0	Unique
						c41515_f1p4	Unique
						c41531_f1p0	Unique
						c41549_f4p1	Unique
						c41563_f1p0	Unique
						c41668_f1p0	Unique
						c41672_f1p1	Unique
						c41741_f4p0	Unique
						c4180_f1p1	Unique
						c41833_f1p3	Unique
						c41876_f1p0	Unique
						c41878_f1p4	Unique
						c41895_f1p5	Unique
						c41941_f3p2	Unique
						c41959_f1p6	Unique
						c4196_f1p2	Unique
						c42021_f1p31	Unique
						c42075_f2p1	Unique
						c4211_f1p1	Unique
						c42148_f2p2	Unique
						c4216_f1p1	Unique
						c42164_f2p1	Unique
						c42178_f6p10	Unique
						c42200_f1p1	Unique
						c42295_f1p6	Unique
						c42387_f1p5	Unique
						c4244_f3p0	Unique
						c42483_f1p0	Unique
						c42523_f1p0	Unique
						c42568_f1p1	Unique
						c42611_f1p4	Unique
						c42618_f8p4	Unique
						c42741_f1p0	Unique
						c42744_f30p13	Unique
						c4277_f2p0	Unique
						c4284_f5p3	Unique
						c42840_f2p0	Unique
						c42858_f2p1	Unique
						c429_f28p13	Unique
						c44153_f7p2	Unique
						c44384_f7p2	Unique
						c4477_f1p1	Unique
						c4488_f1p1	Unique
						c4501_f1p6	Unique
						c4502_f1p1	Unique
						c4590_f1p3	Unique
						c46390_f8p2	Unique
						c473_f10p8	Unique
						c4931_f1p0	Unique
						c504_f13p0	Unique
						c5070_f1p1	Unique
						c51057_f9p12	Unique
						c515_f14p3	Unique
						c517_f5p13	Unique
						c5207_f3p1	Unique
						c522_f7p4	Unique
						c5267_f2p0	Unique
						c529_f20p12	Unique
						c5327_f1p2	Unique
						c5532_f4p17	Unique
						c5570_f1p2	Unique
						c5616_f1p0	Unique
						c5628_f1p0	Unique
						c564_f16p4	Unique
						c5708_f1p3	Unique
						c571_f29p10	Unique
						c576_f16p1	Unique
						c5791_f1p4	Unique
						c5800_f1p1	Unique
						c5835_f1p0	Unique
						c5838_f1p1	Unique
						c5949_f1p0	Unique
						c595_f9p10	Unique
						c60_f12p5	Unique
						c6017_f1p0	Unique
						c60326_f55p29	Unique
						c60345_f64p29	Unique
						c60356_f17p33	Unique
						c60413_f23p9	Unique
						c60443_f1p5	Unique
						c60508_f6p18	Unique
						c60521_f24p13	Unique
						c60534_f4p7	Unique
						c60559_f7p1	Unique
						c60561_f7p4	Unique
						c60563_f5p1	Unique
						c60572_f3p0	Unique
						c60607_f4p1	Unique
						c60612_f4p3	Unique
						c60644_f6p5	Unique
						c60645_f6p3	Unique
						c60649_f4p7	Unique
						c60659_f1p5	Unique
						c60660_f3p2	Unique
						c60673_f5p2	Unique
						c60675_f3p1	Unique
						c60752_f3p15	Unique
						c60762_f3p1	Unique
						c60772_f1p2	Unique
						c60786_f3p0	Unique
						c60789_f2p7	Unique
						c60823_f5p7	Unique
						c60826_f3p0	Unique
						c60836_f2p2	Unique
						c60838_f2p2	Unique
						c60851_f4p4	Unique
						c60870_f3p7	Unique
						c6088_f1p0	Unique
						c60927_f9p5	Unique
						c60944_f2p0	Unique
						c60965_f2p1	Unique
						c60988_f3p0	Unique
						c61055_f2p7	Unique
						c61068_f2p3	Unique
						c61086_f2p1	Unique
						c6113_f1p0	Unique
						c61139_f2p4	Unique
						c61210_f4p2	Unique
						c61232_f2p0	Unique
						c61309_f3p0	Unique
						c61360_f2p0	Unique
						c61382_f2p0	Unique
						c61395_f3p1	Unique
						c61399_f2p0	Unique
						c61400_f4p3	Unique
						c61424_f2p5	Unique
						c61490_f1p0	Unique
						c61492_f1p1	Unique
						c61524_f1p1	Unique
						c6153_f1p0	Unique
						c61608_f1p1	Unique
						c61639_f2p8	Unique
						c61697_f1p0	Unique
						c617_f12p1	Unique
						c61755_f2p2	Unique
						c61761_f1p2	Unique
						c61821_f1p2	Unique
						c61853_f1p1	Unique
						c61925_f4p3	Unique
						c61941_f1p1	Unique
						c61942_f1p0	Unique
						c61984_f1p0	Unique
						c61999_f2p0	Unique
						c62004_f1p4	Unique
						c62058_f2p3	Unique
						c62064_f1p2	Unique
						c62065_f1p1	Unique
						c62066_f1p1	Unique
						c62076_f1p3	Unique
						c62101_f1p2	Unique
						c62205_f4p10	Unique
						c62332_f1p4	Unique
						c62336_f2p4	Unique
						c62384_f1p5	Unique
						c62444_f1p0	Unique
						c6256_f2p0	Unique
						c62563_f1p2	Unique
						c62612_f1p3	Unique
						c62618_f1p3	Unique
						c62627_f3p2	Unique
						c62668_f1p1	Unique
						c62710_f1p1	Unique
						c62739_f1p2	Unique
						c62767_f4p6	Unique
						c62807_f1p13	Unique
						c62852_f2p1	Unique
						c62874_f1p4	Unique
						c62932_f1p0	Unique
						c63086_f2p0	Unique
						c63113_f1p10	Unique
						c63134_f1p0	Unique
						c63140_f1p1	Unique
						c6318_f1p0	Unique
[truncated: 485 more rows]
