# Supplementary material for: Global transcriptome dissection of pollen–pistil interactions induced self-incompatibility in dragon fruit (Selenicereus spp.)
Source: PeerJ. 2022 Nov 1;10:e14165. doi: 10.7717/peerj.14165 (PMC9635355; doi:10.7717/peerj.14165)
Supplement: Table S6 [file peerj-10-14165-s014.xlsx]

## Sheet: Supplement Table 6
Table S6 The homologous F-box, S-Rnase genes and their sequence of dragon fruit
Gene ID	Homologous gene name	Sequence
>Cluster-5676.7631	F-box	TACCCCCCCCCTCCCAAAAAAATTCCCCAAACAGAAAGGCAACCTGAACAGCTCTTTCGAATGTCTTTAAATAAAGAGCCAAAAAATGACAGCTTGGATTGTGCAGCACATGACCAAATTGCAATGCCGCAAATCTATTTGTGTCCGCCGCAGTTGTAGTATGGAGATTACCTAGGCCTTGACTTCATCATATGTGCATAAGATCTGTGCCGTCGGGGATGCACGACAAAATCTCATCAACTCTTTTGACAACTCTAGCTTAGCATCTTTATCAAGCTTTGATTCAACTTGGATGGACAAGACTTGAAGAACAGGTGAATGGCGAAGCAGAATCTCGATCATTTTCAATTCAGCCTTTGTTCCCACAAGTTCGTTGATTCTCACAGTTTGAAGATTCCG…
>Cluster-21981.0	F-box	GGAGGTCCCTGAACCGTCGGATCACGATCGGCGGGCTGACGGCGTAGCAATTTCCGATGAAGAGACGGCGGCGACACCACCGTTCGATCTCGTACCAGGCCTTGCAAACGAGTGAGACCGAGTTGAGGTCCGAGTCCGACTCGATGAAGGAGAGTACGTGCTCCAGAACTTCCTCCGGGAAGGAAGACCAAGACGACGCCGTTTCGGAGGGTTTCAGGGATTTTGGTGTGGGCGATACAAGGGATTCTGCCTCCATCGGTGGGGACAATGAGGAGAGTAGATCCAGCTTCGGATGAGAGAGAGAGAAGTGGGATGTTGTACAGAGTCGAAAGGAGGAAGATTGGCAAAGCAAGGGATTCTGCAGAGAGAAACAGACAGAGAAGAGGATAAGACTTTAAG…
>Cluster-16377.0	F-box	TGTCCTCGATCTTGATGAGAATCCCAGAGAAGAAACTTGCAATAACGTTGTTGTGACTGCTGGGAAACCTGAGAGCTTCAAAATGCCGGATCCTTATAAGCCTCCACCTAGTAAGAGATCTCGAAAAGATCGAAGTCGAAAGAACTTGGGATCCATGGATTCATCTGAAATAATGGAGCAGGAAATCTGGAAAGAGCTCCCAGAGGACCTTCTGGAGGCTGTCATTGCTAGGCTTCCCATATCTGCATTCTTCCGCTTCCGGTCAGTTTGCCGGAAATGGAATTCATTGCTGGCCTCATGCAGCTTTTCAGAACACTGTGCACAATTGCCAAAACCCCGACCTTGGTTCTACACTATTACACATGAGAATGTGAACACTGCAGCCATTTATGACCCTTC…
>Cluster-5676.4610	F-box	GTATCATATGTCAAGTATTGGGTAAATGATTCACAATAACACTCGTAAGAGGAATACATCCGAAAGAAAGGTTATAGTATATATCAAGGGGCATATATAAAAGCATTTTCAATTAAATTTACAAGATTTTACATATATAACCCCTCTAAAAACAAAATACTTCAATATAAATAAATCTTCCACAATATTAAAATATCCTTCACTAAACCGAATTAAAATGCAAGAACATTTGCATCCAGCTGTCAGGATCATGGTAACCAGTATGCACATGTAAATTATGACAAAATACGTGTATAAAACCATGTTGGCATAGTATTGTTAATGAATTCATAGTTTTTCTAATTCAACTACGTGCTATAAAAAAAAAGTGTTTAAATCTTTTTTGGAGGTGAACCTCGT…
>Cluster-11749.0	F-box	TTTTTTTTTTTTTTTTTTTATTGCAAGAGTACATTTATTGAACAGCATCAATATATACAGTAGCAAATACCAGAAAATCAAAGGTACATATTACAGGGTTGTCACAAAGAGAGTGCAATTATCAACACCACACTTCAAAGCAGACATTCGTGATGCCATTTCTTTTGAACTCCCAGGTGGGAATGATTTGACCCATCCAGTTTTTGCATTATCCGCTGTGGCATAACCATATTCAGATCCTAAAGACATCAGTCTGAAACCGTTCATCGTACAACCTCCAATGACCATACCTCTCGCTGTGGAATACAGATCTGGGAATGTAGAAGTTCGGCTTCTTAACATCCTTCAACTTCTTCAAATTCGCTGTTGCATTTACAATATCACGGCTAGTGAAGTTTA…
>Cluster-5676.10000	F-box	AGCAGCCTGAACAAGCTTGTGATGATGAAGAAGAAGCCTTAAAACAGCTACAACTTGCCAATGAACACTCACAAGCACAACCCTTCAACACAAGTCAACAAGAAGATGTCCCAGCTGAAGATGAAGAGGAGCTCACAAATGAGGAAAATTCTCCACCCAATGTAACACAAAAGGAGGTAACTCAAAGACTCTGTAAAGTCCTATCACCCAGTGGACAACCTCTTTATATCCAACTAGAGTTGACTTGATAAAAGAGCATCTAGGATCCCTGGAGATTAATTCAGGCCACACAGGTGGATGTTCATTCAAATTCCTAAAAGAGGTAGAGAACCAAGCATTCTAACCCGAGGGAAGTTGTGCACCGTATCTCACGTTCTTTTTATTTAGTAATGACAAATA…
>Cluster-5676.10001	F-box	AGCAGCCTGAACAAGCTTGTGATGATGAAGAAGAAGCCTTAAAACAGCTACAACTTGCCAATGAACACTCACAAGCACAACCCTTCAACACAAGTCAACAAGAAGATGTCCCAGCTGAAGATGAACAGGAGCTCACAAATCAGGAAAATTCTCCACCCAATGTAACACAAAAGGAGGTAACTCAAAGACTCTGTAAAGTCCTATCACCCAGTGGACAACCTCTTTATATCCAACTAGAGTTGACTTGATAAAAGAGCATCTAGGATCCCTGGAGATTAATTCAGGCCACACAGGTGGATGTTCATTCAAATTCCTAAAAGAGGTAGAGAACCAAGCATTCTAACCCGAGGATGAGCTCAATCAAAGAGAAAAGGATGAAGAGGGTACTCAACAACTTTC…
>Cluster-5676.9268	F-box	CACATTCTCTCTCTATCAACCCTACTGCATGCCATGCATCTTTGATTTTGGAGAGAGAATTGAATGGCTCGGCATAAGGCCGATTGGTCGGAATTATACCCGGAAATCCTAATTTCAATCGCCGGTAAACTCGAGACCCGCGATGATTTCCGCCATTTTCGATCAGTTTGCAAGCAATGGAGGTCTTCAATTCTCCAAATTCCTGAAGATCTACCCATCTTATTCCCCGGTTTCCCTCACAGATTCTCACACCCACCTCCCAATTTATCCAAATATGGCTGCAATCCTCTCAAAATCGTCGTTAATTCCACATTTCTTCTCCAAAAGCAAAACCCTAACCCTAACGCTAAGCCCTGGTTGATTAACCTCGAGGAACTCAACCCAGGTAAGCTTCTCATC…
>Cluster-16065.0	F-box	GCAAATTGTCAAGACTTGACTTTGATATATTGAAAGTGATCAACTAATGAATGTGTCAAGTCATTTCAGTTTGAACTATCCAAGTCTCCCTCAAAACGGATAAATCGTATGAACGCATAAAGCTCAGTATATATAAATTTTCAATGAAACTTCCCTTTTTGGGGACTACTTCCCTCTAGTTAGAAAGAAAAAGGCAAAATATATATACCTATCTCCTTGTTCACTGTGCTCATATGCAGAAGCAGATCAATAAGAGAAGGGCAACATTTACTCCAGTGAGCTAGGTAGAACATGATGTCCAAAAGTTGTCATCGCTGAGTAGTACCTAGGGACGTTATTGACACTAGGTGCCCATATTACTATTTATGCAGAAGCAAAATAGACAAAAGCTGATAGTTA…
>Cluster-16065.1	F-box	CTTGTTTATTTTTTAACGCATAAAGCTCAGTATATATAAATTTTCAATGAAACTTCCCTTTTTGGGGACTACTTCCCTCTAGTTAGAAAGAAAAAGGCAAAATATATATACCTATCTCCTTGTTCACTGTGCTCATATGCAGAAGCAGATCAATAAGAGAAGGGCAACATTTACTCCAGTGAGCTAGGTAGAACATGATGTCCAAAAGTTGTCATCGCTGAGTAGTACCTAGGGACGTTATTGACACTAGGTGCCCATATTACTATTTATGCAGAAGCAAAATAGACAAAAGCTGATAGTTAATCTAGTCACATGCGATCCCAAAATTTGCGAGAGTAGAGTGCCGCAGGATATCATCATGGGTTAAAGCCAAGGTCAAGCAGGTACTCAGTGTATGCT…
>Cluster-25873.0	F-box	GAGCAAGCACGACCTCAATTCTCAAGGATTGCTATCTAGCACTCCATTTGAATCATATGAATGAATAAATATGGATTCCGGAGGAAATGAGGCCGAGAAAACATCACTAAGAAAAAAACTTGTAAACATTCTGATGGAAGGTAAAAAAGGCAGCAGCAGCACTGTGGCCTGCTTGAAGAACAAGAATATCAATTCAGAACTTTATTCAGGATGATGAAAACAGTCTTACCAGCCTGGCAGGTAACCTTATTTCGGCTTAAGCCATGAATCAATGATTCCTATGTAACTTGCCAGCAGTTTATGTAATACTATAATTTCCAGATTAACCGTAATGTCAGGAAAAATTGCCACTTGAATCAGGGAACACTATCAAGCCGAGGCTCAAAGCAAACACCTGAA…
>Cluster-14853.0	F-box	GGTGTATGTACACCCTAAAAAGGAAACAAACAAAACGGAAAGATTAATGACCAACGTTGAGCAACATCCGGTTGCCCGGCCTCCTACAATCAGCGATGGATAACCTCCCGCCACCGCTGACTCTCGAAATATTGAGTCGACTCGCCGATTCATCAGACCTAGCTCGGTGCCGTCTCACCTGCAACACCCTAAATTCTCTCTCCTACGAGGTCACTTCCATCAATCTCATATGCTCTTTCGATCGCTACACCAAATCCCGATCCTCACCCTCCCCCTCCCTCGTCACACCTTTCAAGTCCATCGTCGATGACTTGATCCCTAAGCTCAGCTGCCTTGAGTCGATTTCGATCGGCGTCGACAACGTCATGCAGGAACTGTCCTACGATGATTGCGACGACG…
>Cluster-7627.0	F-box	CTTGAATTTATTGACATCTCACAAAGCAAATCATCAATACCAATGATACAAAGCAATCTACACATACAAACACAAGCAACCTCTGCGTGTGTTTCTTCATGAATTAGAGTAACAATTTGGCTGTTTCTTTATTTATATATGATTGAATCAATAAATACTTGCAAGCTTTGGTATTTTTCACCAACAATTGAGTTTGAGAGGCAACCTGCAGTAGTATGTAACCCTCAATGGACAGGCCATGCATGAAGATTTTCGTCGTTTAACAGCATCCCTTTGGGTTGTATTTGAAGAGCTGGACTTATAGTGAGCAGACCGATGAAGCAGTCTAGAGGCACCCTCATTCCCCACACGTTTATGGACTCTAGTTTACGACACTTATTGACAAGAGCAAGAAGCCCG…
>Cluster-977.0	F-box	AAAATCTCGATAGAATTGATCAGAAAGACAAAAATTCTCCTACCCAGTAGAAGATTCAACACAAATAATCCCCTGTCAGAAATTTCATGGCTTCAGACTTGAGCTCAACAATTGTGGCAGAGCTAGAGGCTGCTTCTCGATTGAGGACTGCTCAGTTCTTCGTTACTCAGAGACCCTGGCTTGATCTCTACGGTGTGAGAATTAGGCCAGTTGCAGCATTTGGAAGTGTCTCCAATAAGCCCTCTAATGATCCAGCACTTATCCACCGTGTCTTGCCTGATGAGCTGCTTCATGAGATCTTTGCAAGAATGCCTCCTTATTATCTGGGAAGAGCATCTTGTGTTTGTCGCAAATGGAGGTACACCATCCGTAATCCTGTATTTTGGCGCAATGCTTGCT…
>Cluster-5676.6523	F-box	GGGGGAGTGACCGAGTGGGAGACAACAAGAAAAAAGGGAGCCTCTTTCTCTCTGAGAAGGGGGATCTGGTGGTGGCTTTCATACTGTGCGGTGCTGACCACCGTTCCATTGGTGGTGCGACGTTTACCGCCCGGTTGATACAGAGAGGCAGAGAATGTGGTGCGGATCTGGTGGTGCCATCCCCTGTTGATTCGATTGATCGGTTGATTGATGTTTGATGTTGATATTTCAATGTTCGATTCGAATAATTGAGTTGATTTCTTGATCTGATCTCGAAATCTGGAAACTTTTCTGCACTCGAATAAGACACACCACACCACACCGCACTCTCTGTCCATCGCTCTCTAGCCTTTCGTATCGGTCCAATGTCATCTCCATTTCCGAGCTTTTTCTGAATCG…
>Cluster-5676.3043	F-box	CTTTCTTTTGCCTGAGAGAACAAAAAACAGTCCCTCCATTTTGCCCTTTTTTTTTCCCACACCACCGCCTTCGACGGCGCGTGCTTCACGAACGCCGCCCTACATGGGCCAATCACCGTCCGTCCCCGAGTTGACTCGCCGTCGCAGCACTCGCTCCTTCACCCGTTCTTTCACAAGTCGACTCGTTTCTTACCCTTCTACGAAATCAACGGCCGGGATGGCTCCTCCTAGCCCTCATCGTACGGCGGAGGCGGAAGAGGAGCTGGAGAAGGAGGAGAGAGAAAATCAAAGTGGGTCGGATGTGAACCCTAACACTAACCCGAAAGGGAGAGACAACACATCGGAGATTCCCGACGAATGTCTTGCCCTAATTTTCCAGTCTTTAGCTGCGGCTGATCG…
>Cluster-5676.6226	F-box	AAAAAAAAAAAAAAAAAAAAGGAAGGTTACTAAAACTGTGAAAGAAAAATGTAGTACAACTTCCATAAAAGCTAAGCAAAGGTTACAACTACAGAATACTCGAAGGCTGCTTCAGTGGTTTTGGTCTGACTAAAGAGATAGCAAGCGTGTGGAATATGATGATTCTCTACTCCAAAATATCCTTTGGCCACAGCCTTTTCCAAGTAGAAATCTCATCATTTTTGTAGAGCTTTCGGATGCCGCCATAAAATCCTTCTGCCTCATTGCCTTCTTCCATGTGATCCTTCCTTCTTACGGTTGCCCTCCTCCACCGTGATCCTGGGCTGTACTGGTTAAACTCGAGGACCAATGTGTCACTGCAATGACAATGGCAGTAATTCTCATTCCCATCGCATGACT…
>Cluster-15601.0	F-box	GGAAAGGGCAGGCTTAGCTTAGCCTGAACTCGAACCCCATCGCATCTTCAATTCAATCCTATCTTAATTCCCATCAATTGCACAGGCAAAAATCCACTAAAAATGGCAGGAGCAATTGAGAGATACCAAAAGCTGAGATTGCGAGACGCACTTTCTCTCACCTATCGCTACCCAATGGCGTGCAAGGAGCTCGGAGTCATTCTTCGGTTGGCTTACTCCAAATCCCCCAAACCCCTTCAATCTCTTCTTCTTGAAGATACCCTCTTCGCCTTTCGTCTTCTCCCTCTAGTGCAGACTCAAAGTGCTGTTTCAGCAGCTCATCTTCTCATGCAGAGTGCAGCAGCTGCATTCCCAAAGCAGAAACGAGTTCTAGCAACTACCGAGTTTAAGCAAGCAAAG…
>Cluster-25770.0	F-box	TATATGGTTCTGTACCTAAGAAAGGATTTGGAGCGCATCGGGTGTGCTTGGATGAATCTCGGTTTGCTCCAGCTTTGAGTTTCATCTTGAAGCATAGAGATCACCCTGATTCTGGGAAGCTATACCCCAATAGAGAAATTTTTGAGTTTTGGAAGATTGTAAAAGACGGGCTATCATATCCCCTCTTAATAGACCTCTGTGAAAAGTTGGGCTTAATTCTGCCCCCTTGCTTCATGCGCCTTCCAATCGAGCTCAAACTTAAGATTCTGGAGGCACTTCCTGCAACAGATATAGCCAGAGTGTCGTGTGTTTCTTCAGAACTGCATTTTATCGCTTCAAACAACGAGTTATGGAGGTTGAAGTATGAAGAAGAGTTTGGGATAGCTGCAGATCCCCAAA…
>Cluster-11635.0	F-box	GGGTGGCTGGGTGTCATAGATGATAAATTTGGTGCCCAAGAAATTTGACCTTAATTTGCCAATGTAGGGGCTACTTGATCGTGATATGTTATCTGCATCCATGCTAATGACATACTCTGTACAAGTGGTTCGCCTAGTTCGCTTAGCCGAAAGAAGAAATTTTCCGTTTTCAACAAGCAAAGCTGGGCTAAGACAAAGGAAGAGATGGTAGGTTAAGTTGGATTTGTCCCTCTTAATAAAGCACTGAATAGTTCCATCCCGTGGTCCGGGCTGCTTCAAGGAAACAGGGAAGGTAAGCTTCCCCGAAACCTCTGGACTCTTGACGATTTCTTTACACATATCCCTCCATGACCTGCAAACAGCAGCACAAGCAACAACATGCTTTCTGGCAGGCCATGT…
>Cluster-238.0	F-box	CTCACACACACACCCTCCCTTTTTCTCTCTCTTTTATTTTATTTTCTCTCTCACTTTTTTTTCCCCTACAGTGGTTGGGGTTGGTTGTTCAACACGATTTCCGGGTGATCTTTTTCTTGGAATGCAAAGATTGGCTCAAATCTTGATCCGGGCTGTGTTGATTGCGTTGATAAGCTTCGTCTTTTTTGCTCTCTTCTGGGGGGTTTCTTGTGAGAAACAGCCATGCCTGCTCTTGTCAACTACAGGGGTGATGATGATCTGTATTCTGGGGCTTCATTGCGATCTGGAGATTCTGGCCTCCTACTCTCCATTGGCTCCCATGTGGAGATCTACTGCCCACCTAGAAAGAGGTCTCGAATCAGTGGCCCGTGCGTTGTCGGTGGGAGTCTCTTTGAGGAC…
>Cluster-11932.0	F-box	TACTAATCAATGGGCACTGGCACAGATCAAGCCTCTCCAACATGCTGCATTCATTTGCTATCTCAATGAGGCCTTCATCGCCAACAGAGGAGACACTCCAGAGTGAAAGAGACTTGAGAGATGGACACCCACGAGCTACAGCAGATAGACCGAAACTTGTGACACCACGAGCAGGGTTGCTTCCTCTGATAGAGAGCTTCTCCAGTCCACCCCGCCTGGCCATTTTAACAGCAATAGCGGCAAGTCTTATATCTGTGGCTTTCTTTCCTTCCAAGGACCTTGTCAGACGACCATCTTGTTTATCCTCAGAGATCATACCAATTTCATTGTGAGCGCAAAGTTCAGCCCTTCGGATGCTGCTCAAGACAGTAAGCCAATGCTTGGAGACACAAGCACAGG…
>Cluster-25363.4	F-box	AGCATGGCCAAAAGGAAAAGGAGTGAATTCAAGGAGATGGACCTTATTGGTAAATTTCCTGATGAAGTGCTTTCTTTGATTGTGTCGCGTCTGCCACTGCAGCAGGCTGTACGGACTAGCATTCTCTCAAAAAGATGGAGACATGTCTGGACGCAGGTGTAATTCTACAATGCCTACAACAGTTGCCCACGTTCGACAGGCTCCAAGAGTTAGTGCTGGATTGTTCGTTGCAGCGGTCTCCTTTTGTCTTAAAGATAGTCTCTTCATGGTTGAAGGCATCACCATATTTGCAGAAATTACAATTAATAGTAAGTGTTTTGTAGCTCCTATGTTTTGAATTACTTTCATGTCATGATTCTGAGACCTTCCCAAAAGTCTCCAGCCATCCTACGGGCTCCC…
>Cluster-7552.0	F-box	GTAAGAACGTGTCTCATTATTATGAATAGCTCTGAGACATGTAAAGGGACTCAGTACATAAGTGAGAATGTAAATAACTAACTAGTACACAAATTTAGCCCAATTAAGGGATTGTATGTAACTTCAAAAAGCATTAACAGACTGTAGACTGATAAGTGTTCATAGTAACAATGCAAAAGGCTTCAATCCAATGAAGAGAATTGGAAGATTAGCATTACTACCCCTTCACATGATGCCACAGCTTCCAAGGATTGCTACAAATCAATTCAAATAGGCATGCTGGGAATTGCTTTCATACTATCGAGTTGACAATCTGACCACCAGCATAAACAGCACATGGATCACAGCACATGTAAGAGAAAGGCGAGTTAGGCCAAGGCAAATGGCTTCCCTCCAGCC…
>Cluster-5676.7	F-box	GGGATGTATTGCGTAAGCATCGAATACGATAATTCTGATGAGATGTTTATATTATGGAGTCCTGGACGTAGACAATTTCATGTGTTACCTCCGTGCCCATTAGAAGAGTCGGATCCATTTACCGGTATTGGGTTTGGGTTTGACCCTTCAAAAAACAGCTATAAGGTCATTACAATGCAGGAGATAAATTTGTACTCCACTTACTTCTACCTCTTTAACCTTCAAACAAATACATGGAAGGAACTCAACCTACATGAAATCATGGACCATTCCCTGGAGAAGGGGAAGGAACACACTAATGGGAGTAACGAATTGCATTGGGATCAGTATGTCAATAAATTTGATGGAGTTTACTTGAATGGGTCATGCCATTGGGTGGTTGGGGGTGTATCCATCCTA…
>Cluster-16440.0	F-box	TTCCATTGGTCAAGCCATTGGTTAAACCATTATAGTAGGTGTGACGGCATTTTGGCATTTAACATGACCGATGAGTCCTTCAAATTAATGAAAGGGCCTCCTGTACCTGAATCTGAGGACTCGCACCAAAGCATTTGGGTGTTTAAGGACACTCTTGCCATGGTTATCAGCACCACTGAGAATAATGAGAATCCTTCTGGTGCTACTGTATGGATGATGACGGAATATGGTGTAGAAAATTCATGGGCAATCTTGTATACGTTTGGACCAACTGCTGGGTTGAGTATAGTTGCGCTTCCAAACGATGACCATATTTTCTTTCATGATGACAAGGGACAATTAATTTCATCTAACTTTCAGGACCATAAATTTAAGGAGTATGGTGTCCTTGGAGTATGT…
>Cluster-5676.5515	F-box	GTTGTGGGTCGCTTTTGATGTGACCACTGCTCTACTCTGTCCCTTTTCCCCCTTTGTTTTTTCCTCTGTGAATCTTTCCTAATTTCTCACCCTAATCATACAAACAAACTAATTCCTACTTCTTCCCCACCTTCCCTCTTCATCATTTTGCAGGTATAGTTCTTTTGTCATCCTTTCTGAGGGCATCGAAAGACTCGGATTGTGATTGAGAATAAGAGAGATGTAAATCCTGACATGTTAGGTGTTAAACTGTGCCATTGACCCAAATTTTGGGAAGATGTTTGCCAATGGACATATTGTGGAAGATTCTTTTTGCCAGGATTTTGAGTCTTTGACAGTTTCAAGAAAGCTCGTGAGAACTGTCAGCCAGAAATTACGAAAGAAGAGAGTTAACAAAAG…
>Cluster-5676.2051	F-box	CGCATGTCTTTGAATTGAACATGAATACTGATTATCATATTATGGCCACAATTTCCAGCGAGTCGAGGAGAGGGATTGAGTTGGCCATAAATTCTAGTCAATTTGTTTCTTATTTATGCTTTCTTAAAACTTTTAAGTTGCTCTTGTATTTGTTCGGTTGCAACCTTTCACTACAGTAGACTAATGTTATTAGAAGATGACTTGAGCTAATACAAGATTAGGTAGCCTTTGATGTTCTCCACATGAATAAATGAAAGTTCATCTTATAGCTTCAAAGAGAAAAAAACTAGGGGAATGCTAAAAATTAATATCATTATTGTTCATAGCACATCGGATTGAGAGGTACAAATATTTCAACATATCTTAGAACGCCTTGAGTTCCATATATATTAGGGAAGA…
>Cluster-11317.1	F-box	CTCTTAGCTGCTCAATCGAATTCTGAACTGGTTTGGGAACTGAGAAGCCGTTCTTGGGGATTGAGATGTATTTGCTCTGTTATATAGTTGCTGAAATGCAATTCAATGACACTTGATGTTTTGTTATTGAGCTCAGATTGAATTATTCAATTGCAACCAAGATGGAGATCACCAATGTGGAGTTGCCCATGGAAATGGTGACTGAAGTGCTGGCCAGGCTACCACTTAAGAGTTTGCTGAGGTTCAGGTGTGTTTGTAAGTCATGGAAATCCCTCATCTCCGCCCCTGATTTCGCTCACCTCCATCTTGCTCGTTACCATCATGACAGCGATGACAACACTTCCATTTTCGCACTCAGTCGTGGAAATGACCGATGGATGCTACGTTGTTCTCATACTT…
>Cluster-11317.0	F-box	GGGGGGGAATGTTGTGTTAAACGCCCCCTCGACAGTTCTCTACTCTTGAGCCTTCACTACCTTGCCGGAGACTTGGGTTTGAATAAATTCTTCATCGCCGATCAACTTTCTCTTGTCACCCTCGCTTAATTGAAGATTGAATTATTCAATTGCAACCAAGATGGAGATCACCAATGTGGAGTTGCCCATGGAAATGGTGACTGAAGTGCTGGCCAGGCTACCACTTAAGAGTTTGCTGAGGTTCAGGTGTGTTTGTAAATCATGGAAATCCCTCATCTCCTCCCCTGATTTCGCTCACCTCCATCTTGCTCGTTACCATCATGACAGCGATGACAACACTTCCATTTTCGCACTCAGTCGTGGAAATGACCGATGGATGCTACGTTGTTCTCATACTTT…
>Cluster-16804.1	F-box	AAATACTCGTTCTACTCCCGGTACGATCTCTACTTACTCTGAAATGTGTTTCCAAATCGTTTCTGTGTTTAGTCCAAAACCCTAATTTCGCGAATCTGCACTTCTCGCGATTTAACAGCCTCAATTCTGAGTCGAATGACTCTGATCTCTTGCTCTTAGAACGATCCGTCTCATTTACTGTATGCCGTGGTGATACGTCAACGAAAAAGTTGGAATTTACGATTTCAATTGACGGTGGTGACGATGTAGTAGGGTATGTAAATGGGCTGCTTTGGTTGCACAGGTTCAATTCTGCAATCAAGTGTATGTTGCTGTGCAATCCATCGATTAGGAAGTGTCTGTTGATCCCCACATCCCCTGCTTCTCATCTTGGTCGAACTGACGTGGGTTTTGGGTATG…
>Cluster-5676.9637	F-box	AGCAGCCTGAACAAGCTTGTGATGATGAAGAAGAAGCCTTAAAACAGCTACAACTTGCCAATGAACACTCACAAGCACAACCCTTCAACACAAGTCAACAAGAAGATGTCCCAGCTGAAGATGAACAGGAGCTCACAAATCAGGAAAATTCTCCACCCAATGTAACACAAAAGGAGGTAACTCAAAGACTCTGTAAAGTCCTATCACCCAGTGGACAACCTCTTTATATCCAACTAGAGTTGACTTGATAAAAGAGCATCTAGGATCCCTGGAGATTAATTCAGGCCACACAGGTGGATGTTCATTCAAATTCCTAAAAGAGATGAGCTCAATCAAAGAGAAAAGGATGAAGAGGGTACTCAACAACTTTCTCAGCTGAAACCAAAGCAAACAGAGCAT…
>Cluster-5676.10502	F-box	CTTAGCCATTATTCTATTGAAATTTCTGGTAACTGTTTTTCCTTTTGGCTTCCCCCCCTCCCATATGATAAAGGAGTTAAGATTTGATGACAAAGCTTAATACTGGCGTTACGTTCGTGCTCCATACAATAATGCAATTTGCCGCTAGCTGCGAGAAAGCCGGATTTGCGCCTAAAATTCCAAGTGTGCTCCATCCTTCAATAGCCATCTCTGTTTGGTGACAAGAACGACATGCATCACTTTTCCTTTATGTGAGGAATTATATGCGAAGGAGTGCATGTAGAACAAGGAAGTTGCTGAAATTCACCGCATCTTCCGGACAATTCAGATCACATGGAAGCAAAGAGTGTTTTCCCTGAAGATGTGCTAGAAGAAATATTGTCTAGATTGACAGTAAGA…
>Cluster-5676.8029	F-box	GGCATTATTATTAGATATATCAACATTATAAATAAGTAACTCAAATTCCTGATTTTCTCATTCCAAAAACATAAAAGGAAAAAAAGGACAAAAATGATGCACAACATTAAAAAAACAGCCATTACTACAACCCAGGTCTTAAGGGCTCCATCTATACATGGTGGCATCTGGAAAGGAAAGGGATAAGGGACAAGGGAAAGCTCTCAAATTACATTGGCTAGGTTTCGGACCCGATTCACAAGCAAAGAAGCTGGGCTTCCACCCAGTAGACCATCCCTATGACGGCTGCTTATCAGTTATGAGTAATGTTAGTGTCAATAACTGCTCATAAGCCATAGTTTAAGTAGAAGCCATGAGATCTCGAGTCGAGCTTCATCCTATGAGACTCCTAGTTGACAC…
>Cluster-5676.7748	F-box	TGAAGAGGAGAGGGGTTGATTTTCTTCTTTTCTCATTTTTCTGCCCCTGCCCCTTTCCTTTCAATTTTTGTTCTTTAATTTAGTAATTTTTTTTGGGGGGGTATTTTTTCCAGGGAAATTTATTGTGTTTTTCTTCAGATCTATGATTTCTTCTCCATTTCTCAGAAATTTCCCTAATTTATGCAATCATCACCTTTTGATTTGAGAAGGAGGATGATGATGATGCCCTCAAAATTCACTTTTCAAAGTTGGATAGATAGATTATGATCAAGAAAAAGCAATCCTTTTTTATTACCGTGGTTCCTTCTCTCTACTGTTCTAGGAGATCCTCGAAATTTTCTGGGCATTTCTTAAACTCATGCAGTCATCATCAATTTTAGAGAAAATCCAAGAAAGTAG…
>Cluster-5676.9209	F-box	CTCTTGGTTGGGTCAAGTATCTGGGAAACATGATCGGATAGTGTACTGTAACCCCAGCAGTCTCTAGAAGGAGCCAAATCATTTTCCTTTGATGTATTGTTAGAAATAATAAACAAGAAACCACAGTGGGGTTCGTTGGCGCAGGTTCCCGTGCTGAAGCTTTACCCAGGGCTTGAACCAAAATATAGGTGCTGCACATGAAACGTATGTGATATCTCATATTATGTCGGTATTGATTGAAGGCCTCCCGGATGCTGTTGTTTTAAGGTGCCTCGCACATGTTCCATTTTATCTCTATCCTAAGTTAGAGCTTGTAAGTCAGTCGTGGAGGGCTGCCATTCGTAGTGCTGAGCTATTTAAGGCTAGGGAAGAGGTTGGTTCATCGATGGAATTCCTATG…
>Cluster-5676.9207	F-box	GCTTTGTCTCTCTACAAGGCGGTTCAACGGCGGACGGCGGTGCGAACGCCGGCGACACGGCGTTTCAGTCTCTTTGGTTCTCTTGTTTCTCTCACTAGAGAGCAGGCAGCCACCACTTATCGTTGGCGCCTAAGGTTCCCGTGCTGAAGCTTTACCCAGGGCTTGAACCAAAATATAGGTGCTGCACATGAAACGTATGTGATATCTCATATTATGTCGGTATTGATTGAAGGCCTCCCGGATGCTGTTGTTTTAAGGTGCCTCGCACATGTTCCATTTTATCTCTATCCTAAGTTAGAGCTTGTAAGTCAGTCGTGGAGGGCTGCCATTCGTAGTGCTGAGCTATTTAAGGCTAGGGAAGAGGTTGGTTCATCGATGGAATTCCTATGTGTATGTGCT…
>Cluster-5676.9007	F-box	GTCCTGCTCTAGTGGCTGTTCTGTCAATCTGTGCATCTCTCCTCATGAGGTTGGAGAGATCCGACTAATTCAGTTGAAGAAATCGCAAACAAATTTTTTGATTCTTCAATTGCAGCCACTATATGATCATACTTTTGAGGAAGCCTTACAAGATTCCCCGGTGAACAGGCAGACGTGATCTAGAATGAGCCCCATCTGGCATTCCTACTCATCACCTATATAAATTACTATCTCTGGGGACAATCCTTAAGGATTCCTATCAGAAGTTTCAGAGACCATCCAATTCTGCCATCTTCCTGAAAAGTCAAGGACGACATCGAAATGGAGGAGGAAGAAAGAGCAGAGGACATGATTATCAATCTGCCCGATGCCATTGTCCATCTAATCCTGTCTTTTGTC…
>Cluster-14584.0	F-box	TTTTCAGCCTAATGCCAGCTTCAAAAGGAGAGACCGAGTTTGGGGGTTTGTTCTCCAAATCCCAGAAAATCCCAACTGTGCTTTGAGGATTTTTCACCGTCGAAGATGGCCGGTTTGAAGAATAGAAAGACACAAATTGTCCAAATTGAGAAAATGCATCTAATCTCCAGAAAGGCATCAGGGTCTTTGGTCGTCTAATATGCATTTCATTCAAAAGACCCAATTTTTTTAGGGTTTAAAGGGTGCCCAGGTACATGGGCTTAAGCACAAATTTGAAGTTAAAAAACTGCAACGAAGTGGGAGAGAGAATGACTACAATGTCAGCCCAAACCAAGAATTAAAATCCCTCGAACAATTTGCCATGCCAGTTTCACAAGAGTTGCGACAATCCCAATTCGA…
>Cluster-14574.0	F-box	GGGGAATTCAAAGAAGGAAGAAATTTTCCGAGAATGTCGGGTGCGTCGGATCTTTTGCCGGACCAAATAATTTGCGAGATTCTAACCCGTTTGCCAGCGAAATCCATATACCGTTTCAAATGCGTTTCGAAACGCTGGCTTTCCGTCATTTCCAGCCCCCATTTCATCACTTCCTACCTCTCTCACTCTACTCCTTCATGGACCATCTTGGACCGTGCTATCCGGGTCGAAGAGAGTCCGAAAGATTTCGATGTGGGTCTCTCTCTATCCGAGCTTCCAAGCGTCAGTTCCTTCGCTATCTCTCATCGCATGGTGGACAGGGATGTAGTTGATCCCAGCCGCAGAAAATACCCCGCTTTGATCTCGAGTAGCAGTGGACTTCTCCTCGTCGCCATTGCT…
>Cluster-5676.9502	F-box	TTTTTTTTTTTTTTTTTGACAATGGGAATAAACTCTCAACATATCTTAAACAATTAGTCAACAACATTCCTAGCCTCTTGAGACTGCAAGTAGTTGGATTATAGAAGGCACACTCAGATCCACCAGTCGTTCCAGGGACCACCAGCAGCATATCACCATCCCATGCAAAAGCTCTGAACAATAAGTTGTGACCACATGGGATTGGTCCAATAGTAAACAAATTCTGCCATGATAGGGGTACTGTAGGATCATCATCATCAAATTTGTTCACAACCCAAATGTCAAAGCCACACACTTTGTCTTCATAGTTTCCACGAGTAAAAATTACAGCGAGAAAGTCTCTGTACTTATCAATGCACCATGCTGATTCAGATATACCCTTCCATGTTGGTGGTGGTG…
>Cluster-5676.6425	F-box	GGGGGATTGAAAATAGATAAGCTCTGTTTTTTTTAGTCCTCTAACGACCCCCAAAAAGGAGGGGCCTCATTCTCAGGTGAAGAGAGAGAAAGAAGAGAGAGGGCGATAGAGAGAGAAAGGCGATCTCCGGAGTGGCACCACCCTCTCCTCGGCGGTGCTACTGCGGCGTATGCGGCGGCGGTCTAGAGAGAGAGCTGAGCAGATGCAGTGACGCCATTGCTATGAATATTATAGACATTTAATTTGGTGATGGTTTTGGTTTAATTGATTCTAAGTTTTTCGACCATGCTGATGATCTGATCGATGTCGAAATTTCGATCTTTCTTTCTCGTTCCGCCTCTGCTATTTCTCTCTCTATCTTCTCCATTTTCGAGCTGTCTCTGAATCGCGAGATCGATC…
>Cluster-5676.4786	F-box	GAAAAAAAAGAAATCATTCAACTTAGGTGTAAAGCACCATTTCTTTAGAAATGATGGACAAGACGTACACTATCCAAAATTTCCAGCCACACATCTCCACAATAAGAATTTAAGAAAAACCAAATACAAAAAAATAAGAAAAATCAGTTGAGCGAAGGGTGCCAAAAACATTGCCAAGTGACAAGCGATTTGATTTTGAAACGTTGAGACTCGCCTTATTTTATTATCATCATCAAATTCTGCTGTCTCTCTCATCTCCCATCCACACATATCGCATTTTTCCCAACTTCACTCATTTCTCTCTCTGTCTCTCTCTACTTGCCCATCTCCTCAAATTCCACCGTTTCTCTCTCCTGGCCTTCCTTCCATGGCGGACGCCACCTTCTCGAAGCTCTCAGA…
>Cluster-5676.6325	F-box	CGCACCTCTCCTCGAACAATTACCTCTCCTCTCTTCTTGCCTTTCTTCTCCCTCCCCGTTTTCCATATTCCTCTCACGCCGAACTCCCTGCGCCAAACCCAAACCACCGCACAAAGAAAGGAACCCGTACAATGACAACAATGGGGTCACACTCCTCTTCTTCTCACTCCTGTATTCACCCCCGTCTTTCTTCACCATAACCCAATTAGCCATTTCCTTTTTCCTATTCTCGTCTTTGATTTTATGGCGCCATGATTAGCATATAGCAGTAGTCTGTCGATTGCACTCTTGGTTGTTGGAATTTGCGAATTGGGTCATGGGAGCGTCGCTCTCGAATTTATCAGAGGGCGGCGCTAATGTCGGAGGCGAAAACGGGCCGGGGCTCGGCGACATTCCGGA…
>Cluster-5676.9323	F-box	TGTCCTAATCATTCAATTCATTCCTCAAACTTTTAAGACCTTCAAAACAACATTCACTAACAAGTAGCTTGGCAATCGTTTCTTCCCATAAATGTTCAGCGTCATTAGTTCATCCAACTACAAGAGAGCAGAAATTATTTTGTATTTTTTTTTTCCTTTAAGACAAAAGCATCATAGATTCAAACTGAAAACCCAAAATCCAAAAGACATTCTTCCCAAATCAGGATGAGTGTGAGCAAACACCTCCAATGCCTTCAACATTATTTTGCCCGATATAATGAAGGAAACCCGGTATTAGACAAGCCAGGTAGGAGGGGGCCAGAAGAGCTTAGCTGCATTAGCACACTTAGGGTGGTCAGCAACCTCCTTAATGGTCCAGTTCCTCAGGTTAAACCCACC…
>Cluster-5676.7579	F-box	TGAAGGAGGAGGAGGAGGAGGAGGCATAGAGAGAGATACGGGGAACAAAGTAGAAGGTTCAACGATTGAATTTCAATGGCGATCGAAACCCTAGCTCTAATCCCAGGCCTTCCAAACGACATCTCCGCTATAATCCTCTCTTACATCCCAATCTCCTTCCATGGGCGCCTCAAACCCACCTGCAGATCATGGCGTTCTTTCTTCTCTAACTATTCCTGCAAAGCCCTAATTTTCTCTCTGCGTCA
>Cluster-11737.0	F-box	GTAATGCAGGGCGGCCACGCAAATATACGGCCGCCATTCGGAGTGCAAAAATGGCTGTCCATGAAGCTTCTACAGATATGATCAGTGATTTGCCCAAAAATGTTATCGACAATATTATGCAATTTTTGCCCCTCATTTATGCAGCGAGGATGAGTGTTTTGTCCAGGAAGTGGAGAAGTAATTGGTTGTCATTTCCTCAACTTGTATTTGATGATGAATTTGCTGACCCAATACGAGACAGAAGTGCTGAATTTGATGCTTGCAAGTGGTCGAACATCATCAGTAACATACTCTTACTTCATGAGGGGCCTATAGTTAGATTTTCTCTGACTATTCCATTTCAGCTATCTTCACCATCTCATGCTGACATTAGTCCATGGATCTCATTTGTTTCGAGGA…
>Cluster-5676.10109	F-box	TCATTATCTCACTAATTCCAGAAAATGGGGTGCTGTGGGGACGAAGAGGACGACGATGACCTCCTGCACCAGCCCCTTATCTCCGGCATCACCACCGACGCCGGTGAAACCGCCGGAATTGTCGCCAGAGACACGACTTCTCCGATGAATTCCAACTTCTCTGCCATAATTTGCAGAGATACTCTCCGAATCATCTTCGAGAAGCTTCCGATCGCCGATTTGGCCCGCGCCGCTTGCGTTTGCAGGCTTTGGTGCTCCATCGCCGGCGATCGGGAGATCCAAACGGCCGCCTTTAAGGCGCCATGGAAATTGAAGGAGATTGTTGGAAATCCGAGCTCCGGAAGTTTCTGGAGGGATAATAGTTTGAGCAAGTTTGCCATTTCTCATCGCCTTGTTAGA…
>Cluster-3550.0	F-box	GGGGCATTCAATCAAATTAAACAGCCGAATGACAGTATAAAATGTAGTACATAACTAGGAATAGACAAACAGAAGAATGGCACAAATTAAATATCAGAAGTACTTTAGGGTTATATAGAACTCAATAACCTTCTTACAATGACATTGTTTCCAACTCCTTTGTGATTTTCTTTATTTTTCCTCTTTTCTTTTTCCTTTCGCCCTTAATCAATGCCATTGATGAGCTTCCAGGAATACGAACAAGGCTTTGAGCACAGGTACAGAAGCTAAAGGAAGAATAGTTTCTCCCTTGATAAAATTTAAGTCTCTCTATCCTTCCAATCTCACTCGGTGAATGTGTAGCATGGTACCAAAAAAGCTTCCCAGATCTTCGTTTTTGGAACAAAATTCTACGTCCAC…
>Cluster-9204.0	F-box	GTTGAGGTTAATAAATTGAAAAAGACCAATGAAAAAAACAAGCCCCTAGTATAACATATACATATTGGTTTTCATAGAAGAATAGGGAATAATAAAGATCAAAATATTAACATGAAATGCCATGTGCATTTTACTGGAAGGAAATGAATACAATTTTGACATTTGAGGATTGTTGGATGGCAATATCTCACAATCAACAATCAGGAAATAAATGTTAAAAGGGTCAAACTGCATCCTAGGAGAACATTGTACAAGTTCAGAAGGTGAAGGAAATCAGTCAGTCACACTGACCCAGCAAGCATCATGAGCTCCCCAACCCACATAAACTGGAAGTTATTGAGTCTATACATAGATCCAGTGAGAGACTGGATCAGAGAATACACGGTTCAATGTCATCCA…
>Cluster-3619.0	F-box	GGGGGGGGGGGGGTTCGTGCCTGGCTCCTACTGACAAAGCGATGTGGAGTCGAAATGAGAACAGAGTAAAACAACGTTGCAGATAATAACCCACAAACGATAAATACACAGACTGCAATACTTCATTCACATTGAAAGCAATAGATCCACAGATAATTGCACAAGCAGTTACGCAGAAGAGAGAGCTAGAACTACCAACTCTTTTGAACAAATTCCACAAGCTGTGGAAGATAGCACAGAGAGCGAACCTTCTAAGGAGATGCAGGCCAGCCTAGCTCATACATGTTATCAAGTCCATCATATATCCTGAGTTCTATCCCTTCGTCATCCCACATCCCATCAAAACTCTCGTCATCACTATAATCCATATAATCATAATCCGAGTAGTCTGTGTCTGAG…
>Cluster-18151.0	F-box	AAGCAGTTGTAATATTCATGCAGAGGTCCCTTAACGCATAAGACAAAAGGTGAGGTACATCAGAGTGCACCATTACACCGCTTGATGACATTTAAAGTTACACCAAATGAAGCATAGTCATGTTCATACCTACAATATTCACAATACGAGACGAGATCAGACTCGATTATTAGGCTTAAACGTGTTCACAAGCCCAAAAGCTCTATCAAGTTCCCTGCACTTCTTACAAGCTTATCGTTCTATTAAGTAAAACATGCAGGCGTATTCCTTTCTCTCTTCTCAAACAAGCAGCTCCCATACAGGATCAATTTATACAAGATACTTATCGGTTAGGCTTCAGGGGGCACTGCCATACTCTGGTAAGATGAGCAGCCAAAAATGTGTTTTCCTGTCTCTCAA…
>Cluster-19896.1	F-box	TTCAAGTACGCGCTTTACACCATCATCAGTGATTTTGGGGCACTCTACCAAGCTCAGGCATTGAAGAGTGCCATCAGCTCTGTGAGCCAATTCCAAAAGAATATCATCCGTGATCTTTTCATTCAAAGGCTGGTCGATGTGGATACTCTTCCATAACAATGGCTCACCTTCAACCTCAGACCGTAAGGATCTACAAACTCTTTCTACTGACAAGAGGTCTTTCACCCCAAGATACATTAGACAAAACTTAAAAGCATCATGGGGCACTTCTTCAGATTTGGCAGCACCCTCCACTTTCTCTCCAAAATGCAACTCAGGACTGCAGTTAGCGCTCTCATTGCTGAAGCCCATAACACAAACTTCTTCGCACTTTGGTTGAAATTCATTGTTATATGAAGC…
>Cluster-3039.0	F-box	GCAAATCGGAGGCGGAGAAGACGTAGCGAATTGACTAATACTCGACTTAAGGCTTAAGTCGAACATGGGTGGAGATTTTTCTTGCGGTCCGTAGAAGTTTAGACGGAGCTGCCAGTTTCCTAAGACAGAAGCAAAAAGGAAATTTTTTGCACCAAATTGGTAAAAGAGGTTCCAAGGGTGCCTTGTTGGATCGCAATCGTCGATATGATGCAAGAAGCTTGTTAGTGAGCCATATAAATCATGGATTCCTCCATTCTGAACCAATACTGTATCCCAGAAATCTCTCCATTCCTTTGACCACAGTCTCATTGTCGCCGCATGTGGGTAAGAAAGAAAGTGGATTATCAGGCAAACAAGCTCGATTGGCAATGTGGTCAATAATTCATGATCAGTGCTGCG…
>Cluster-5676.3	F-box	GGAAATAAGAGAGAAAAGGGAGTGAGATTAAGAGTTTGGATGGTAGGATACTGTTTGTTTCATCTGATTGCTGCTTTTTTGCCTCTGCCAAAGATTTCCCAGGATGTAGAGGGGATTGCGTCCTTTTCCCTAAAGGTCATTTTCCTTCCTACTATGATAGTATTTATCCAGATGACTTTTATTTCAAGGGAGCTGATGAGATATTGGAAATTGGGGTGTTTCACTTGGATAATGGTGCAAGTGCATTGATATCAACTTACCCTGGGATGTCGAAGATATTTTGGCCGCCTCCGTGGTGGCTCTTCTCGGATACATGCCTGTCCGGCTGGGAGAATGGAGAAGACAACAAAGAGGATACCCCTGAAGTGTGCAGCAGTGAAGAGATGTGCTCTGCTTCTT…
>Cluster-5676.6	F-box	TCGATGCTTACGCAATACATCCCATTCACCGGGCCCCGCACATGGCTGGATGAATATTCCCCATCAGGATGAGGACAAAGTGGATCTTTTATATCAACAGTTTGTTTGGTCGAGGTTGATAATAATGCCAAAGGTATGATAGAATCAACGACTGTGATGTTTTGGTTGACTAAAAGAAAATCATGTGTGGTGTTTGCATTGACGAGATTTAGGTGTCTTTCAAAAAAGAACGAACTCCCCAAAAGAGAGTGCCAGCTTTTGCATACAATTTTAAAGCGCAACATAGAATTTATTGGTAATCTGAGGAGTATTTGTATCATCACTTCTTCTGAGAGATCAGCATAGGTCGTAGTTTCTTTCGTGGCACCCATTACATCGATTTGTCCGTATGATGAGAGG…
>Cluster-5676.3433	F-box	TGATTCAATTTTTTTTTTTCTTGTTTCGTTGTTTGGTGTTTTACATTGTATATGCATAACAACATTCCTACAAAAGCAGAGTACAGCATAGCTTATTAACTAAATAGCATCTGGGAAAACAAAATTCAACAAAATTAAGTTACTAATTACGGCTACAAATACAATAACCTGATGATTCCTGTGAGGAAAACAAAACAAATACATAAAAAATGTTGCTCAATCCTTCCATTTTCCTGGAGGAAAAAGCTTTCTTGACTCCGGCAATTAAAATAGCTAGTCTGTGGTACTACCATTTTCTAGTTGAGGGAATGGAGAAGCCAGGCTTTCGACATAACTGACAGCAAAAGAGAGATACACGTCTTTAGGCAAAGGAGTCATTTTGGGTGAATGATGAGTATA…
>Cluster-5676.2422	F-box	CGAAAATGCTCTTCGCTCCTGATTACAAACTGAACTTGGGCAGCGTCAGAACTCAGAACGGAAGACAGACGTTGTAGGGCATTCACTTCCTGATTTCTGATCCCATCAAGAGCCCCCGGGGGGGGGGGGTGTATCGAGGCTCGAGAGGGGTTGTTGACCAGTTTCGAGATCAAAGCCTGAGAGCGGGGAGCGGGGTTGGGGGAGGAGAGAGAGATGGCGAGTAAGAAAGGAGAAGGTGTTGGGCAAGGAGAAGGGAAGATGATGGGCTTGGAGCAACTGCCGTTGGCTCTTCTGGGCACAATAATGGCGAAGCTGGATGTCGCATCCATCTGCTCCCTCGCTTCAACTTGCCGCACCTTCAAGTCCTGCGCTTCTCACATCCTCACTTTTCTTCCTTCC…
>Cluster-5676.8486	F-box	GGAGGGAAATAAAAGGGAAGATTACCAATCTTCACATTTCTTTTGTGCCACACATGGTTTAATTTATATGTTCAATTTACATATGGATTTGAGAATTTGGGATGTGGGATATTTTTCTTTGTGATTACTGCACAACAATTAGATTTTTGATATGTTGATTTACATTATGTGCAAGAGAAGGATTTTCACTAGACTCCCAAAGCTTGAAACTGTAAGATATGGGCCAAATTTAGTAACAATCGTCAAAATTTCGCCTGGTGTATAGTTGACAAATCAAATGTAATTCGAGGTTATAGTTCAATTTAAAAACAAAGCCTTTGAGTTTTTGGTTCAATTTTTTCTAGTGCCTAAGTGATTCATTTAGCATTTTACTGCATCTTTACTTTTCGAAAGTAAAGG…
>Cluster-11714.1	F-box	AGACTTTTCTTGGTGAAGTTCTGATATCAGAATTTATATTTTAAAATGTAGTACAAAACGTTACAAATATACTTTTGTAAGAAATTTGTATTGAATAAATTCACCATTATAAAGTCTATATTTACTCCATTCTAGGAATTTGGGTTCTCTAAGATTAAAATAGATATAGATACCGAACCTTCCTACCTAGTGATTGAGTGTTTTTTTAATAACTATAGCTAGCAATAAGATTATTATATGGTTGACAACAACTTTATAGACAAATTTAAATATTACGTGCCAAATAGAAGAACAGTAAGACAGCACTCCAAATTGTATCAGAACCTACTTAAGCTATGTCCAACGCCAACACTTTAGGGAGGGAGGTGAGGTCTGCTGGTTGGGGAGGTAGGGAGCAGA…
>Cluster-5676.7732	F-box	CGCATGTCTTTGAATTGAACATGAATACTGATTATCATATTATGGCCACAATTTCCAGCGAGTCGAGGAGAGGGATTGAGTTGGCCATAAATTCTAGTCAATTTGTTTCTTATTTATGCTTTCTTAAAACTTTTAAGTTGCTCTTGTATTTGTTCGGTTGCAACCTTTCACTACAGTAGACTAATGTTATTAGAAGATGACTTGAGCTAATACAAGATTAGGTAGCCTTTGATGTTCTCCACATGAATAAATGAAAGTTCATCTTATAGCTTCAAAGAGAAAAAAACTAGGGGAATGCTAAAAATTAATATCATTATTGTTCATAGCACATCGGATTGAGAGGTACAAATATTTCAACATATCTTAGAACGCCTTGAGTTCCATATATATTAGGGAAGA…
>Cluster-6827.0	F-box	CTACTACGGCAATTCAATCGATATTTTTCACCACTTAGACAATTCAATTGATATTTTTCATTACTAAATCAATTTCAATGGTTTAGATCGAAACTTGATTATCCGATTGAAAGTATTAAAACAAGCTCAAATATGAATTTTAAGCTCAACATTATCCATTCGGTCAACATTTACCTATGCTACGACCATTCGTTCGATATTTTTCGCCATTTGAACAATTCAGTTGATGTTTTTCTTTTTTTCATGGAAAATGATTTATCTAGTACCAAATGGTGAAAAATGTGATGTAAAAATCAAATTTCCTTGGAAAATGATTTTCCTTCTAACCAAATGCTACCCTAGTTATAATTTATTTTACCTTATGCTCTGCAAATTAGCCAACGCCCTTTGATTCATATG…
>Cluster-6827.1	F-box	CTACTACGGCAATTCAATCGATATTTTTCACCACTTAGACAATTCAATTGATATTTTTCATTACTAAATCAATTTCAATGGTTTAGATCGAAACTTGATTATCCGATTGAAAGTATTAAAACAAGCTCAAATATGAATTTTAAGCTCAACATTATCCATTCGGTCAACATTTACCTATGCTACGACCATTCGTTCGATATTTTTCGCCATTTGAACAATTCAGTTGATGTTTTTCTTTTTTTCATGGAAAATGATTTATCTAGTACCAAATGGTGAAAAATGTGATGTAAAAATCAAATTTCCTTGGAAAATGATTTTCCTTCTAACCAAATGCTACCCTAGTTATAATTTATTTTACCTTATGCTCTGCAAATTAGCCAACGCCCTTTGATTCATATG…
>Cluster-14057.0	F-box	GGTGTATGTACACCCTAAAAAGGAAACAAACAAAACGGAAAGATTAATGACCAACGTTGAGCAACATCCGGTTGCCCGGCCTCCTACAATCAGCGATGGATAACCTCCCGCCACCGCTGACTCTCGAAATATTGAGTCGACTCGCCGATTCATCAGACCTAGCTCGGTGCCGTCTCACCTGCAACACCCTAAATTCTCTCTCCTACGAGGTCACTTCCATCAATCTCATATGCTCTTTCGATCGCTACACCAAATCCCGATCCTCACCCTCCCCCTCCCTCGTCACACCTTTCAAGTCCATCGTCGATGACTTGATCCCTAAGCTCAGCTGCCTTGAGTCGATTTCGATCGGCGTCGACAACGTCATGCAGGAACTGTCCTACGATGATTGCGACGACG…
>Cluster-4462.0	F-box	GCGGACGGAGAAGCACCACCCGATGATGATGCCGCCGGGGATACGGATTAGGGGAATTGATGTGAGTTTGGATGTGATTGATGATTGCTTATCTGTGGTTTGCACTAGTAGATATAGGGTTTCGATTTGGGTGATGAAGGAGTATGGAGTGAGAGATTCTTGGACTAAGTTGCTAACGATTAGCCCTCCTTTGATCGAAAGGAATGATTTCGTGAAGCCATTGGCGTATTCGAGGGACGGTGCGAGGGTTCTGTTGAACTGCGACGATAAGAGACTTGTTTGGTATGATTTGGAGAAGAAAACTGTTGAGGAGATTGTTGTTGAAGGATTGCCATTTGTGTTTTATGCTGAGCTGTGTGTTGAGAGCCTTGTTACGCTTAATGGACGGGGTGAGGTGAA…
>Cluster-8548.1	F-box	TAGACCTCCAAAGCACAGTCACATAACAGTAAGGGTGACTTTTCATAAGGAATTGCAATGATACTTTCTTTCAGTTTATAGCTACAATTGTTGTTGTAGCAATAGTAGTAGAAAAATAATAATAAGCTACCCCCAGAGCTAGATGTTGATAGCTATATTAAAATAGCTATGGCTACTTAAATGGCTAGTCATTATTTGAACAGCTATAAGCTACTCAAACTACTAGTTTAGCCAAACATGGAATAATTCTTTGTATCCATAAGTTATGAAAAAAGTTGGTGGACACGGGCTTCATTATTTTCTATCTTCCATCTTTGTAACTTCAATGCAGTTCCACCACTTGCGTAAAACGTATGCTAGCCAAAAGAGAATCGGTGCCTGGGATCGGGAAACTTGGCA…
>Cluster-5676.521	F-box	TAGCCTGACCTGAGCATCCGCTCTCCCTATTCCCCTCACATTCATTTCTCGGGGCAATCAAATCATAGCCATCTCTCATGGAGGACGGAGATACTCAATATCCAACCATTGCCAATGCCATCCCTCACTGGAAGACCGTTAATGGCCGCCTTCCACCCGACTCCCTCCTCCAAGTCTGGGCTCGTCTGCCATTGAACACCCTCTACAAGTGCCGATCAGTCTGCAAGCTCTGGAAGTCCGCCATCTCTTCTGACCCTCTTTTGCCCAATATCCGCCACCGTCTTAACTTTCTCTTTCCTTCCCCTCCTAATCTCCTCCTCTTCCTTCACTTCCCTAACGTCCCCCTCAAAGTCCCCGAGCAACCAGTTCTTCTCTCCACCCTAACCGTGGAGGACGTCG…
>Cluster-5676.523	F-box	ATAATGACGGTTGGCATGTTAAGGTCTATAATATCTCTACTGATTCGTGGAGGACTATATATTATGTTACCTCGTATACCGACGAATTGTATTGTCCATTTGAAGAAATGCATCCCAGATTCCCAAATATTAACTCAAGTCCAGAGTTTGGTTATGGCTTTTTGAATGGTGCATTTTATTGGTCATGCAATTGGCAGTGGAACATTGATGGCATTCTTGCGTTCAACATGGAGGATGAGTCATTTCAATTGATCAAGGGACCTCATTCTTCAACAAATTACAATCAGCGAAGTATTTGGGTTCTTAAAGATACTCTAACTGCCATGCTTAGTTCTGTTGATTTTAGTAGGAATTCCTCAGGTACAGTTGAGGTCTGGATAATGAAAGAATATGGCGTTG…
>Cluster-3340.0	F-box	GAGCTTTACAGTTATTGAAAGGACTCCTTTTTTAAACGGGGCTATACATTGGATAGGATGTGATATGAGCATGGCTTCGTCCCATTTGGAGGGTTCTCATGTTGTAGCGTTCGATGTGCAGAGTGAGGCCTTGAACCACTTTTCCCTGCCTGATGATTTGGGAATTTACCGTTCTAGAACTTTCGCTGTTCTTGGCCAATCCCTTGCATTGTGGGATATGGAATTGGGCTCGTCTGCCATATGGGTGATGGAACAATATGGTGTGGCTGAATCTTGGGTTAGACGGTACACAATCAGTTTTGAATTTGGGCGGATCTTGTATTTTAGGAGCAACGGTGAATTATTAGTTAACATGGAAAAACAAAAGTTGAAAACTTATAACATAAACAGCCAGGAGGT…
>Cluster-3924.0	F-box	AGAGAGAGAATTTTATATACACATTAAGACAGTGAAAACTTGGTGATTCTGAGCGTTGTATCCAACTGTTTCTTGTTTTCTGTTTATATAAATATTCTTGAAGTTCCATCCTTTTGTGTTAAATCACTGAACGAGCTTATACGGATATCAGGCTTAAATATGTTACCAGAAGATGTTGTTTCAGCAATTCTGTCGCTCACATCTCCATTGGATGTCTGCGCTTTTTCTCTGGTGTCATCCACCTTCCGTTCAGCAGCAGAGTTTGATGTTATCTGGGAGAGATTTTTGCCATCAGATTATCAGCAATTGCTCTCCAGATTGGATTTACCTTTGAAATTTTCCACCAAAAAAGAGCTTTTCTTTCATCTCTGCAATTCTGCTCTCATAGATGGGGGTAGA…
>Cluster-23671.0	F-box	AAGCAGTTGTAATATTCATGCAGAGGTCCCTTAACGCATAAGACAAAAGGTGAGGTACATCAGAGTGCACCATTACACCGCTTGATGACATTTAAAGTTACACCAAATGAAGCATAGTCATGTTCATACCTACAATATTCACAATACGAGACGAGATCAGACTCGATTATTAGGCTTAAACGTGTTCACAAGCCCAAAAGCTCTATCAAGTTCCCTGCACTTCTTACAAGCTTATCGTTCTATTAAGTAAAACATGCAGGCGTATTCCTTTCTCTCTTCTCAAACAAGCAGCTCCCATACAGGATCAATTTATACAAGATACTTATCGGTTAGGCTTCAGGGGGCACTGCCATACTCTGGTAAGATGAGCAGCCAAAAATGTGTTTTCCTGTCTCTCAA…
>Cluster-7934.0	F-box	GAAAGATGTCTTTTTAGGGTAGAGGAAGAGGACAGCGATCATCACTACCATTTTCATTTTCGGATCTGCCCATGTAATAATAACCGACAAATAAATAGGAACAACTGCACAATGAGTGTTAGAGATTGAAATTGTAGACGCTGATAATTTTTTGTGTTCATCCTTGATAGCTAAGACTACATAGCGATGGAAAATTATGGACCGACAATGGCAATGGTGGTGATATTTGATCGAAGATCAGTGGCCCTCACAGACCTTAGAGTTGTCCCTGATAAAGTGATTTGCCGTATATTGAGTCTTCTCTCTCCTCGGGATGCTGCTGGCCTCTCTTGTGTTAGATGAAGATTATCCACTGAGCGTGTGGTAGCACACCTAGTCACTATTTCCCTTTTCCCTTAA…
>Cluster-13113.0	F-box	GTCCGCCACCATATCACCGTCGCTCCTACTCGCCTCCTCCGCCCCTCCACCAGCAGCAGCCGGCCTAATCACGACGAGTGTGGCCCCCTCCATGACCTTGCTCGAACCGGGCACCTCCAGCCGATCCAAATACCACATTTTCATCCTGAGAGCTGGCACTCTACTCCTATTCTCCACCATTTCATCTCCTTTCCCCTTGGATTCGCGAATCTCCTCGATCTGTTCCTTATTCATACACAGCCTCCCCTGATCACTCTCATCAGAAACCACCACGTTTTCAATCATCTTCAACCCCTTCACCGTTTCCTGCATCAAGTAATGCCTCGCAGACGCAGCAATCAAACACGAAATCGTCCACACGATCCTCAGCTTCAGCTCATCATCCGCCATCACCCGCGA…
>Cluster-5676.7524	F-box	GTATCATATGTCAAGTATTGGGTAAATGATTCACAATAACACTCGTAAGAGGAATACATCCGAAAGAAAGGTTATAGTATATATCAAGGGGCATATATAAAAGCATTTTCAATTAAATTTACAAGATTTTACATATATAACCCCTCTAAAAACAAAATACTTCAATATAAATAAATCTTCCACAATATTAAAATATCCTTCACTAAACCGAATTAAAATGCAAGAACATTTGCATCCAGCTGTCAGGATCATGGTAACCAGTATGCACATGTAAATTATGACAAAATACGTGTATAAAACCATGTTGGCATAGTATTGTTAATGAATTCATAGTTTTTCTAATTCAACTACGTGCTATAAAAAAAAAGTGTTTAAATCTTTTTTGGAGGTGAACCTCGT…
>Cluster-5676.7297	F-box	CCCCCCCCCCCCCCGGTTTGAATCCTAACTCCGGCCCTGACATAAGCAATGCAACTAGAATTGGATGAGTCTCAGGATATAAATAAGCGCAGAGTGAATTCTTATAAACAAAGTTTTCAAACACCTGAATTCTGTTTTCAATTGCTATAAGAGTGTTGCTAAGAAAACAGTGAGTCTTTCTGATTTTCGTGTCTATGCTTAAGGGGCACAAAGGTTTCTACATATTTTAGGACCCCTTGACTCCCACTATAGTAGGGAAAATTAAGGTCTGGTTTACGAAGACCATATATATCACAATCCTTGAATACTTGATCGTCAAAGTCAAATGAAAGTAATCGTCCATTTTGATTGCTAAAGAAAATTTGATGATCATTTGGAATCCCGATGATTGTCAACCCT…
>Cluster-24006.1	F-box	AAAAAGAAAAAAAAAATAAAAATACATAATGCTATCTTTGCAATTGTTTCAACCCTAGCTCGTCATAACTGTGAATAATTATTTGTCAAACATATCAGTCCATTTCTTGAGTTCTTACACATTGTCTCCTCCATTTTCCTGTTCTACCCTTTCAACATCAAAGATGGGACGGAAATCCCTATTACCTGAAGAATTGGAGATCAAAATTTTGAAGCAAACATCTGTCAAATCCCTTTTCCGATTCAAGAGTGTTTGTAAAGATTGGTACTTTCTGATCCGTAGCGATTCCTTTGTTTCCTGCTATTCTTGCAATGCCAGCAATGAAGATATGATTATGTGCTTTCGCAAAGATCCAATTACCAAAATTCATATGATATCGCTACTTAATCATCACACTAC…
>Cluster-18991.1	F-box	CCCTTCCTTCTCAATTATCCATTGTATTTTTCTTCTCCCCCCCACCCCCCCGCCTTTTGCTTCATCTGTATATAAGTTTACTTGGGTTATGTAAATCTTATCCTCACCCCCTGCCCTGGGCGGGATTTCAGGGTGTTCTTCATGAATAATGCAAGTCCCTGCAGGATAGATCTCGCATATGGTAGGTGACTGGGGCAGTGTGTGGGGGGAGAAACAGTTCAGCAACAACTGAAATTGATTCTGGCCTTGTTGGAACAGCGACGACAGATATTGAGCGTCAAACTTTTCAGATGGCCAATGGATTCGGTTCAACAGAACATAGAAAGTCTTCTGCATATAAGTCCCAGTTGATTTGTTCCGCCACTGATTTCGTTCATTGGTCTCGCGAAATTCCTATAG…
>Cluster-5676.7766	F-box	CGCATGTCTTTGAATTGAACATGAATACTGATTATCATATTATGGCCACAATTTCCAGCGAGTCGAGGAGAGGGATTGAGTTGGCCATAAATTCTAGTCAATTTGTTTCTTATTTATGCTTTCTTAAAACTTTTAAGTTGCTCTTGTATTTGTTCGGTTGCAACCTTTCACTACAGTAGACTAATGTTATTAGAAGATGACTTGAGCTAATACAAGATTAGGTAGCCTTTGATGTTCTCCACATGAATAAATGAAAGTTCATCTTATAGCTTCAAAGAGAAAAAAACTAGGGGAATGCTAAAAATTAATATCATTATTGTTCATAGCACATCGGATTGAGAGGTACAAATATTTCAACATATCTTAGAACGCCTTGAGTTCCATATATATTAGGGAAGA…
>Cluster-5676.1399	F-box	GGAAAGGGCAGGCTTAGCTTAGCCTGAACTCGAACCCCATCGCATCTTCAATTCAATCCTATCTTAATTCCCATCAATTGCACAGGCAAAAATCCACTAAAAATGGCAGGAGCAATTGAGAGATACCAAAAGCTGAGATTGCGAGACGCACTTTCTCTCACCTATCGCTACCCAATGGCGTGCAAGGAGCTCGGAGTCATTCTTCGGTTGGCTTACTCCAAATCCCCCAAACCCCTTCAATCTCTTCTTCTTGAAGATACCCTCTTCGCCTTTCGTCTTCTCCCTCTAGTGCAGACTCAAAGTGCTGTTTCAGCAGCTCATCTTCTCATGCAGAGTGCAGCAGCTGCATTCCCAAAGCAGAAACGAGTTCTAGCAACTACCGAGTTTAAGCAAGCAAAG…
>Cluster-5676.4130	F-box	GAGAGGTATGTTGCTTTTCTCTTTGATCAGCTTGGCATATCGATATTGGTAATGCTTGTTGCAGAAGCTGTTGTTGTCAATTAAAGAACACCATGACTTACTAGTACATCTTAATTGCAATAACTGTCTCACTGTTGATCTGCATAGTATTTGCTCTAATAGATCGTCAGAAAATGTCCTCCTTCCTTCCATCCTTTCAATATTTATGATGTATAAAGAACATGTTAAACCTACTTTTTATTCCTTTTCGCGCTTGACATAATGTCCTACTAGGAAGAGAGTTCTGCATGGATTTCAAAAGTAAGGAGCGCCAATAGTGGCATCTGAATCTAAATCTTTTAACTTTTGATAAAAGATGGAAGAAAAAACAGGCAAAACGGAAGATGATTACCAAGAGTT…
>Cluster-17684.0	F-box	ATAAGCTCCTCAACACCCAACTTTCCTAGAGAATAAATGCATTGCTCAAATTGATTTGCATATGATTTAGTTAAACAAATCTTCAACTGGAAAGAAATAATCTTAGAGCCAGAACAAAGCTGCAAGAATCTTTCCAATCTATGAATAATCAATTGAAAGTCGGAGTCATGAGGCGCAAGAGTGCAACGTGACAATAGGTCGGAACAACACAAGTTGAAGTTAGAACTGGATTTATAGAGAGTCCTCCACCTCTTTGACAAAATGCTTGTGCTCACGGCAGATCTGGTCGGAGTACGAGCAATAATTGAAACCAGAATATCATCTGGTAGTTGACTAATGATATCCTTATGTACAACACTGTGGCGGTAGCCTTTTCCTCTCTTTCTTCTTCTTAACAAT…
>Cluster-5676.8637	F-box	CTGCATTCACCGGACTCTTCTCTCCGCCACCATTGCTTCCCATTTTCTTTTCTGTTTTTCCAGGTGTTCTTCATGAATAATGCAAGTCCCTGCAGGATAGATCTCGCATATGGTAGGTGACTGGGGCAGTGTGTGGGGGGAGAAACAGTTCAGCAACAACTGAAATTGATTCTGGCCTTGTTGGAACAGCGACGACAGATATTGAGCGTCAAACTTTTCAGATGGCCAATGGATTCGGTTCAACAGAACATAGAAAGTCTTCTGCATATAAGTCCCAGTTGATTTGTTCCGCCACTGATTTCGTTCATTGGTCTCGCGAAATTCCTATAGGTGATGGATTTCACGAGCTTTTCTAGTTGCTAACCATTTAATTCTTAAGTGAGTATTAGATTTTCTTGT…
>Cluster-13549.0	F-box	ACTTTAGCTGCTTAAAAGAGAACAAATGTGATGACATCATGAAGAATTCATTGCCATACTCTTCCAGCATGAATATTTCAATACCCTGTTTCGACAAAAAATGAATCCACTGGTACACATCAGAGTAATGAGATGCACAATACGTCTTCAGCACAAATTTCTTGATGGCATCTGAATGATTAAGCAGGAAGTTGTTAACTGTACTAGCAATTGAACCCCACCCATCATCTCTGTAGTCCAGTGATTCACTGAATTCATTGCTATCAAGGACAAACTCCGAGAGAGAAAGCCATTTATATCTCCAACTCTTTGCCAGCAGACTCGTCCTAACAGCATCAATTATCGGCAGTTTCCCAAGGATAATATCTAAGACATTCCATGGGAGGTTACTGATTCTAT…
>Cluster-19782.0	F-box	GAGAGAGAGAGAGATGAGAATGGAAGACAGCAGCGAAGAAGAGGAGGAACGCGAGAATATATTCCGGAAGCGGCTTAAGTTCGGCGATGATGCCGATGATATGGAGCAGGACAGTGGAGCTGAGATATTTTCATATGCGGCTGCTGACCGGTTGTTCTACTCACCGGCGACGGTGCCGACGTCCATCGTTGTGTCGGATGCCTTGGAGCCAGACTTTCCGATCATATATGTCAACACCGTCTTCGAGTTCTCCACTGGATTTCGCGCCGATGAAATCCTTGGTCGCAACTGTCGCTTCCTGCAATTTAGAGATCCACGCGCCAAGAGACGACACCCTTTGGTGGATCCGGTTATTGTCTCTGAGATTAGAAGATGCCTGGAGGATGGTGTTGAATTTCA…
>Cluster-15741.1	F-box	CTGTCTTGAATCTCTACCAAATCCAAGCACTCAACAGAGCGATTGGAGTTTGTTTTTGGGAAACAAACAACCCCAAAATTCTCATTTCTCAGATGAAATGACATGATCTTTATGCAATCTGGGTTGAACTTCTTCTCTGCAATTAGCCAGTAAATTTTACCGTCAACATGCGCATATTGTTTCCGACCCAGAAAATCAAATGGGCATTTACCGAGAAATCTCCACTGCCCATGAGAATTTGACCGCAGATGCGAACTGGGTTCGGTCATAATTTCACACATTACCTCCTTTAGCTGACAATAATGGAAGTTGTCAAACTTCTCGGTGGTGTAGAAATGGAGGAGTTTCAAATCGCTGTGAAAAGGGTTCGAAACGTGCCCGAATGCCCAGCCAAAAGTG…
>Cluster-5676.8327	F-box	GGCAATTTAGAAAGAGTCCATGTTACTGAAAATAAATAACTCATTATTTGAGCAGAGTTGACTTGATAAAAGAGCATCTAGGATCCCTGGAGATTAATTCAGGCCACACAGGTGGATGTTCATTCAAATTCCTAAAAGAGGTAGAGAACCAAGCATTCTAACCCGAGGGAAGTTGTGCACCGTATCTCACGTTCTTTTTATTTAATGAGCTCAATCAAAGAGAAAAGGATGAAGAGGGTACTCAACAACTTTCTCAGCTGAAACCAAAGCAAACAGAGCATTTCAAACTACTGTGTCCAATAGAAACATTAGAGCTACCAAGTGTGTATAAAGTGAATAGAGCATTGGCTAAAAATGGTTGGCATTTGTTTCAGCTTCCTCATGGTGCCCCCATTTGTT…
>Cluster-4096.0	F-box	CTCTTTCTCTCTCTCGGTGTGCGATGAGCTCAATCAAAGAGAAAAGGATGAAGAGGGTACTCAACAACTTTCTCAGCTGAAACCAAAGCAAACAGAGCATTTCAAACTACTGTGTCCAATAGAAACATTAGAGCTACCAAGTGTGTATAAAGTGAATAGAGCATTGGCTAAAAATGGTTGGCATTTGTTTCAGCTTCCTCATGGTGCCCCCATTTGTTTCTATCCTCGATGGAAACCAAGCTTTCCCGGTAAACAAAAACTCCATGACACCAACAGCCCATCTGAAATGCAAGATCCAATATTTCTTGTGTGTTGGGGTCACATAAAAATATCCCATATTCAGGAGATTCTAATATGAGTTTATTCTTCTTCCAGTGGCCAATTGGACGTCTAATTCCA…
>Cluster-18991.2	F-box	CTGCATTCACCGGACTCTTCTCTCCGCCACCATTGCTTCCCATTTTCTTTTCTGTTTTTCCAGGTGTTCTTCATGAATAATGCAAGTCCCTGCAGGATAGATCTCGCATATGGTAGGTGACTGGGGCAGTGTGTGGGGGGAGAAACAGTTCAGCAACAACTGAAATTGATTCTGGCCTTGTTGGAACAGCGACGACAGATATTGAGCGTCAAACTTTTCAGATGGCCAATGGATTCGGTTCAACAGAACATAGAAAGTCTTCTGCATATAAGTCCCAGTTGATTTGTTCCGCCACTGATTTCGTTCATTGGTCTCGCGAAATTCCTATAGGTCTTATTAGTGAAAGGAAAAGGACAAAAGAATCAAACATGTGCTTCACCATTTCGCCCCAACAAGACA…
>Cluster-5676.7559	F-box	CCCCCCCCCCAAAAAAAAAAAACCTTAAGCCCCATTTCAAAATGACCTGAATGTCCATAAATATCTTAGTACTTCTCAAGGCCTCCCAACATGTTTGTTAAAATTCATTTTTGTCTGACAAAGATCATAAAATAGATATCAGTTGGCTTAACTGATAAAATTCTTGTAACTTCACTACTAGATTACATATCTGGATTGGAATCCATATAATATCCGTAGGCAATCTTCGAACCTTTTTTTGCACCATTTCTGCACGACATCATCCTAGCCTCTCAACTAAAATCCATTTCTGTCTATCAAAGATTGGAAAGTGGATGTCTGTCAAAGATTGCAAAGCCTCAGGACCACCTCACCAAGCATTGTCCCTTGTTTTAGCCTACCTTCCATTATATGAGCTCT…
>Cluster-5676.5566	F-box	TCCCTCCCTGCCTCTCTCTCTTAATACTCTAACCCAACTCACAATGCTATTAAGGAGGAGCTTTATGCTGTTTTAGTTGCCCTGCCCATAGGTCCCCTATTCTAGCTCCTCTTTGCCCTCTATTTTGCTATCTAGATGGAGGGGACATCCTTGCTACCCAAAGAATTGGAGAGCGAAATTTTGTTAAGATTATCCGTCAAATCTCTTTTTCGGTTCACAACTGTTTGTAGGAATTGGCAATCGTTAATTGGAAGCCCTTTGTTCAAGACACGCTATTGTCAGAAATCTAATGCCAAGGATAATAACAGTAAGTTGCTCTGTACTCGTGAAGACCCATCAACCCAGACTCACGTTGTATCTATTATTGATGGCCAAACTACAACCAAAATAACCAATTTG…
>Cluster-5676.8033	F-box	GAAATAAGAACCGTGTGAGATAGTAATGCTTTACAAACTATATGCACATGTTATAAGAGGAATGATTGCACACATAAACACCAAAATAGACAGTAAACTTCCAGACATATGCCCAAATGATTTTCTCAAAGAGTGCAGAAATTTACATAATGCAGTTGTATTTGGGATGAAGAGTGGCAACCTCCATATCCCCTATTAAGCGAAGGATTTTACAGACTGTATGCACATGTTAAAAGAGGAATGATTTTACATACAAATACAATAACAGACAGGATAAACTTACAATAGATAAATCAGGGTTGAGCCTAAACGATAGAGTGCTAAGTCACATACAGCGGTTGCGTTTGGCATCTAGAGTAGCAACCTCCATATCCCCAATGAAGAAAAGGATTCTATCTA…
>Cluster-4647.0	F-box	GGGGAGGGCAGCGTGTGTCTGTCGGAAATGGAGATATACAATTCGTAACCCTGTGTTTTGGCGAAATGCATGCTTAAGGGCTTGGCAGCTGAATGGAGTTGTGGAAAATTATAAAATTCTCCAATCGTTGTATCATGGCTCATGGAGGAAAATGTGGCTTTTAAGACCAAGACTTCGGACTGATGGTATTTATGTCAGTCGGAATACCTACATTCGTACTGGGATTGCAGAGTGGAGGACCACTAATCCTGTGCATATTGTTTGCTATTACCGGTACATGCGATTTTATCATTCTGGAAGGTTCCTCTATAAGAACTCGTCTCAAAAGGTAAAAGATGTCGCGAAATTCATGAATATCCGCTCCTCAAGATCTGATTGTGTTTTTAGCGGACAGTACAC…
>Cluster-14775.0	F-box	ATGGGTTCAAGAGATCGAATATCTAATCTCCCAGGAGAGATAAAGCAGCAAATCCTCTCTTTGCTATCCACCTCAGATGCGATTCGAACCAGCGTTTTGTCTTCAGATTGGAGGTATGAATGGATCAACCTCCCCTCTCTTAATTTTGGTTATAAATTTTGGAAGAATTCGCAGAAACAGAAACTCACTGATAATCAGGAGAAAAGCGCGGGGTTTAGTTTTTCTGCAAAACAGGAGCTTGCTTTTGGATAATATTCATTATGATAATGAAGATAGTGAAGGGCACAGTTGTTCAGAAAGAAATAAGCTTATTGATGGTGATTATAGTGTTTCAAATATAAAGGCTTTAGGGTACGTGCAATTTCTTGACCGAGTTATTCAGATGATCAGAACTCACCA…
>Cluster-5676.5953	F-box	CATTGCAAAGTTGATCACATTACATTGTATCCAACCAAACATTACATTAGTGTGAGGTGCAGCAATGGAGCAAATGCTTTAAAGACTAGAGATGATGCACAATCAAAGACAATCAGACTGATGAAACTCTCTCTTTAACAAACATCATAGACTCATGGGCCAAAAAAGGGAGGAAAAAATTGCTGACCTTGGGAGCAATTTCATGCTCAAATTTATTGGCTACTTCCCGAATTATTATATATTATTATATATTTATATATAAAAATGAGTGTGAGCAATGCAGGTACACCATATGTCTCTTAAATATTTACTAAGATTTTATTTAAAAATAAAAATTTAAACAATATGTGTTTAAAATCATCATAATAGAGAATGTCTTTTCATCTACTTCTATGAAGA…
>Cluster-5676.1457	F-box	TTTTCAGCCTAATGCCAGCTTCAAAAGGAGAGACCGAGTTTGGGGGTTTGTTCTCCAAATCCCAGAAAATCCCAACTGTGCTTTGAGGATTTTTCACCGTCGAAGATGGCCGGTTTGAAGAATAGAAAGACACAAATTGTCCAAATTGAGAAAATGCATCTAATCTCCAGAAAGGCATCAGGGTCTTTGGTCGTCTAATATGCATTTCATTCAAAAGACCCAATTTTTTTAGGGTTTAAAGGGTGCCCAGGTACATGGGCTTAAGCACAAATTTGAAGTTAAAAAACTGCAACGAAGTGGGAGAGAGAATGACTACAATGTCAGCCCAAACCAAGAATTAAAATCCCTCGAACAATTTGCCATGCCAGTTTCACAAGAGTTGCGACAATCCCAATTCGA…
>Cluster-5676.9270	F-box	GAAAAGGGTTCCTGTCAAGATTGCATTTTTAAATGTTTTTGGCATGTTTGCTTTTATTTTGTGCCGATGTGATGAATTTGTGGCCTTTAATTTCTGATGGTTGGGTTGTTCTCAATCTTTGTGGTTAGGGTTATTGTCAATACTGAATTTGGTGTTTATGGAAAATGCCTCAGCCCCTGATTTGCTTAGCGATTTGCCCTTGAGCGTCATTGAAGGTATTCTTACGTTGCTACCAATAAGGGATGCCATTAGAACGAGTGTACTATCAACCAAATGGAGATACAGATGGGCAAGAGTTCCTCAACTTGTTTTTGATGACAAATGTGTCAAGTTTTCACCAGACAAGGCAATAGTTGAAACTAGGCTAATAAATTTCATTACCCATGCCCTTCTGCTTCA…
>Cluster-25673.0	F-box	CAATGCTGTACGGAATCTATTCATACTTGTTTCACTCTTAATTATCAATAACCATTAGCCAATTGAGTAGACAGTAATCAAAATACTAAGAAAAAGAATAACAAAAAGTTAAAGAAATTAAGAATGAATACTACATAGCATTATAACTGACCGTAATGTTGAATTAGTATGTATGAATGTGCATATAAAAAATTAAAGCAATGTTGTCTGAAACGATTAACGGGATTGCTAATAAACATGATTCATAATGTTTCTACTTATTTTTTTGATAAAAACAATACAAACTCTCCACGTATCTTAGACAATTACCCAATCCTACTCCCATTCTTTTGAGAGCACCGGTAGTTATGTTGTAGAGGGCGCATTCAAATCCGCCTACTGTTTCAGTTGCACCCTCCC…
>Cluster-20795.0	F-box	ACAGGATAGAAGTAGAAAGGTCAATATTCACCTTACACCCACTCAAATTCAGATCAATAACATGTTTGCACTGTCTCACTAAATGATGTATTCCTTTATCCGTTACCCTCACATTCCAATAAATTGAAAATACCCTCAAATTCAGACATGCACTAGCTATGGCTTCTATTCCCCTGTCAGAAATCTTTTAGCAGCCATTCAAATTCAGGATCTCAACGTTCTCAAGAGAGCTGGAGCACTTACTTTTAAGAAGTTCGAGATGATTGTCGTCCTTATCCTGCGCGAATTCAAGGTTTATTTGCTTGACATGCTTATACCTTGGCAGCGAAAGAGCAGCTAACAGCGGATTTCCCGCATTACTCATTTCATGGATATCAAGCACCAGAGAGAAGGGTAGGA…
>Cluster-5676.8590	F-box	TCCAAATGTAAACAGTCATACCGTTGCATATGTTCCTACTTACATAGAGTCTCTATACAACCAATGAACCAAATACAATAATAAAAAATAAAATTACAAATTTATTCGGATTAAATGTATGATTATGTCAACCAAACCTGTCATAAATGTTAATTATGCATTTATGTAGGACAATACATATTACAAAATTCTCAGCTGCAAGTAAGTGCAGCAGAAACTGAAATATTACGACTTCTGAACAAACACTGCCTTGTGTTCTTAAGGATGGTTACGAGGGATTCTAAGCCTACCCAACTATGCTATAGTTGAGAGTTGGTACATTCGTCAATCATCATATGACAAATTACAGCCAGACTTAACAAGCTGAAACAGGAATTAAAAAGGCATTATATACACAAC…
>Cluster-5676.8619	F-box	AAAAAAGAGAGAAATTCACCTTATCTGCGCGCGCATATCATTTGATTAATTTCAGGCTTTCAGCGAGTGTGAGTGCATCAATCTATCGTCCCTCCTCTTTCAGAAACCCTAAACCCTTTGATGTCTCTACAAACGTAATTAAAGATCGATCGAAACCTTACTTTTGAACAGAAATCGTACAGAAATGGGGAGGAAGAACTCGAAATCAAGAAGACCCACAAGTTTCTTCTTCGATCTTCCACTGGATTTGATCGCTCAAGTTCTCGCGAGGCTACCAGTGTATACCCTGCGGAAATTGAGGTGCGTTTGTAAGGAATGGCAGTCTCTGATTGATAGCTCTGCTTTTGCTTCTTTGCATTTCAATCTTTGTAACATCAATCGTCAAAATGCTCCATTATT…
>Cluster-5676.6211	F-box	GATGTCTTTCAAGGGCATTGTACGCGAACTAAAGGAGCTCGGAAGCCTATCATGGCAAGGAGGGAGATCAAGGTCTCATATTGCTCCTGATCAAGCCAACACGGTTGGGGAAGTTGAGCAGGGGCAATGGGCAAATTTGCCACCAGAGTTGCTTTTGGATATTATTAAGACGGTTGAAGCCAGTGAGACTTCATGGCCTGCTAGGACTGCTGTTGTGTTCTGTGCGTCGGTTTGTAGGTCATGGAGGGAGGTTACGAAGGAAATTGTTCAAAACCCGGAGCAATGCGGGAGGCTCACTTTCCCCATCTCTTTGAAGCAGCCTGGTCCGCGTGATTTTCCAATCCAATGCTTCATCAAAAGGGATAGGACAACCTCCACTTTCCGCTTGTTCTGTGGATT…
>Cluster-17735.0	F-box	TCTTCCAGGTACCAGTTTTCAAGGAGTAGATACTCACAAACGTCTCAGTAGGAAATTCAGCCTCAAAATCTTCACAGAAAGAGACAATAACTATCTTATAATCATCACTAATTGAATCATGCCCAAATGCATACACTGTACGGCTTTTCCACCGGTTGAGAGCAGACGGCCAACGGGGCACTTCTCTGACCTCTCCAGTTGTAGGGTTCAATACAAACGTCTTGTGCATTTCCTCCCCAACTAGCAGCAACCCATCGCAAGAAACATACACCCGAGTCCAAGATCCGGGGCAATCGGCAAAACTGAGCTTCTTTGCAGATATGGTAATTTTATCGAACACTTGGTGAGCACTTTCCAAGGGAACCGAGTAGAAGAATGACGTTTCCTTCCATTTGTAAG…
>Cluster-8203.0	F-box	GTTGTGATGCGCTAGATAACTCAACGTATGATTACAAAATACTAGTAACTGTGATGTCCAAAAGAATACACAACCATCAAGTTCTTAAGGTGCTAGCCTATAAATCACTGCGAGCGTTTGATTAGCGAAACGTCAGCAAAATAAATTGTAACACTCTTTCATTTCTTGCTATCCTCTGGTTTGCCAGGAGAAAGGTTGTTCACAGATCTCTTACCTTGTCTTTGATAATCTCTCTCTATTTTAGTGAAAATCGCTTGCTAGCAACTTGAAGCGCCAGTAGTTGCCTCACTTCTCTCAATCACTTGAACACCCTCAAGAAGGAGAGAGAAACGGGTGGAACTGGTGGCACTGGGACGGACGGAGGCCGGAGGAGGGACGGCGGAGGTGTAGGTCGTCGGA…
>Cluster-14164.1	F-box	GAGGGATAGACTTTTCCCAAGTTTTCTAGAGAGAGAAACTGGTGGTTAGAGAGAGAAACGCGCTTCGGCAGACACATACCACCGAGACCCAAAACCGCCGTGTGTTTTAATCCCAACGGAAGATCCACTCGTGTATACGCTTCTACATACAAACGACAACCGCCGTCGCCACCCATGAACGCGAACTACGAGAATAACTTGAAAGGGCAAGACATGAAGTATATTGGGAACTAGTGGATATTGCAACTTTAGTAGATGTCGTTCCGTAGCCTAGCTCGTGACCTAAGGGATAGTATTGGAAGCTTGTCGAGACGAAGTTTTGATGTGAGGCTGAATGGCCACCTCCGTGGGAAGTCTCATGGTGCTGTCCACGAGTTACATGACCAGCCTGAAGTTATT…
>Cluster-11714.0	F-box	GTAAGAACGTGTCTCATTATTATGAATAGCTCTGAGACATGTAAAGGGACTCAGTACATAAGTGAGAATGTAAATAACTAACTAGTACACAAATTTAGCCCAATTAAGGGATTGTATGTAACTTCAAAAAGCATTAACAGACTGTAGACTGATAAGTGTTCATAGTAACAATGCAAAAGGCTTCAATCCAATGAAGAGAATTGGAAGATTAGCATTACTACCCCTTCACATGATGCCACAGCTTCCAAGGATTGCTACAAATCAATTCAAATAGGCATGCTGGGAATTGCTTTCATACTATCGAGTTGACAATCATGTAAGAGAAAGGCGAGTTAGGCCAAGGCAAATGGCTTCCCTCCAGCCACTACACACCCCGGCAGCCATGATCACAGTCGTATC…
>Cluster-17498.0	F-box	CTCTGAGAACACTCCCTAAATTAAACGTGTGCTTTATTGTATGAAGCTCACCAATTCTTGTTTCCAATAATAAGGTACATAAAACTGAAATAAGAAGACATGAATAGGGAGGAAAACATCTGTAAGCTCCAAGTGGAGCCCCAAATTTACAAACAAACGATCAAGATTCCATTGCCTCCCACAGCTCAGCACCTTATATTAACTCAACACAGAGGTAAGAAATAATGGAGCCAGCCCTCCTCTTTGTCCTTTCAGTAACTTTGCACTTCTCAACTAGGATTTTCTTCATATTAACACAGCCAGAGATCAACGTAGCAACACCAGCTGCAGTGATGTTTGGGCAGTAAACTATGTGGCAAGTTTCCAGCATGGCGCAACCTTTTACAAGATACGAAAGGC…
>Cluster-5676.5469	F-box	CGAAAATGCTCTTCGCTCCTGATTACAAACTGAACTTGGGCAGCGTCAGAACTCAGAACGGAAGACAGACGTTGTAGGGCATTCACTTCCTGATTTCTGATCCCATCAAGAGCCCCCGGGGGGGGGGGGTGTATCGAGGCTCGAGAGGGGTTGTTGACCAGTTTCGAGATCAAAGCCTGAGAGCGGGGAGCGGGGTTGGGGGAGGAGAGAGAGATGGCGAGTAAGAAAGGAGAAGGTGTTGGGCAAGGAGAAGGGAAGATGATGGGCTTGGAGCAACTGCCGTTGGCTCTTCTGGGCACAATAATGGCGAAGCTGGATGTCGCATCCATCTGCTCCCTCGCTTCAACTTGCCGCACCTTCAAGTCCTGCGCTTCTCACATCCTCACTTTTCTTCCTTCC…
>Cluster-24857.0	F-box	CTGTAATCCTCCACATGGTTGGGACACATGAATCAGGCAAATAAATGAATCTTCAATTTGACACAATAAATTATTTTGTTCAACTACAATATTTGCACAAACTGGAATCTGCCAAAGATTCCATAGGATACAACATCCTAGAATTGCGACAAACAGAATACCAAGATCAGTTACAAGATATCATACAATGAGTTACAAAATAAGAAACAGACATTATTACCTCAAAACCAAAATTAAAGGACAAAACAGAATATTTTCTAAACAATAGATACTTCTGCACCCAAGTTGGGGAATTCTTTGCTCAACAATGTCCTGACCTTCTCTTTAAATGAATCAAAACAAGGTTCGCGCCTGAATTGGATGGACAAGCGCTCTAGTGAAACAGCATTCTTAACCACA…
>Cluster-24857.1	F-box	CTGTAATCCTCCACATGGTTGGGACACATGAATCAGGCAAATAAATGAATCTTCAATTTGACACAATAAATTATTTTGTTCAACTACAATATTTGCACAAACTGGAATCTGCCAAAGATTCCATAGGATACAACATCCTAGAATTGCGACAAACAGAATACCAAGATCAGTTACAAGATATCATACAATGAGTTACAAAATAAGAAACAGACATTATTACCTCAAAACCAAAATTAAAGGACAAAACAGAATATTTTCTAAACAATAGATACTTCTGCACCCAAGTTGGGGAATTCTTTGCTCAACAATGTCCTGACCTTCTCTTTAAATGAATCAAAACAAGGTTCGCGCCTGAATTGGATGGACAAGCGCTCTAGTGAAACAGCATTCTTAACCACA…
>Cluster-18310.1	F-box	ACATCATCATCATCATCGGTTTCAGAGCGCTCAAATTTGAGCCGGTAGAACTGATCATCAGGGTCGTCTGGATCCCCACAGAGACGATGGCAAAAGATGGAGTAGGAACCAGCGGACATAGAGTGGAGTCTGAAGGAGGAATCTGTGATTAAGGATTGCCATGATCTTGAGACGCATTGGAATCGAAGGAGAGATCGCACAGGGAGCCTCTGAAGGACTTCAACTAACAAGTCCTCAGGCAATGAGCCCTGGGCCTGGAACTTGTCCTTGAGTTTGCATCTTTTAGGTTGCTTCATTATTTGATTTGTTTGTCACTGCCTTACTCGGTGGGGCATGAAGCTGGGAGAGGCAGGCTGCGCGCGGCGTATATCCCGGCGCTCAGGGCTGCCGACCGCGAAG…
>Cluster-18310.0	F-box	AAACAGCAAGTCATTGAATAAATAAGATAATGACCAGTACACACAAACTTGCTGATAGTAAAGTTTCATTAAACAAATTAACTTCCATGCCTATGAGAAGACTGTAAGGAATAGAGGAATGACAAATTAACAATGCCATAAATAGTATTCCCATCATATCAAATTTTTCTTAAGGTGATGCTTAACAAACATCTTGAAAAACGGGGGGCAAGGCTCTTCACTCATAGCTCAGCTAGTCCCATATGCCACACTAGAAATCCAAGTCTCCCCATCAAAAATCCACAAATTCATATATATCATCATCTGCATATATATAAGCATAATCCTCAGCATCGAGCTCATAATCTATAACGTAGGGAAAACTCTTACTAGGCATTCCTAACAATGCTAGGCTCTTGA…
>Cluster-5676.2778	F-box	TGTTTAGGAAAAGTCAAGTAATTGTAGTTGCATAAATTGAGGTAAACGTAATTACAATACAATCTTAATTACATTCTTTAACGGTAACTAAACATGGTAATGAAATCACCATTACTATTTTCATTGCATTACCACTTTGATTATATGGAACCAAACAAACCAATATAGTTAACCTTCCTTTCCTTCCATTTCAAATCCAAACGAGGCAAGTCCATTTTTCCTCCCCTCCCTTCCATTTCTCTCCCCTTAATTAACCTCCCCTCCCCTCCTCTAATATAAAGGAAGTTCAAACAGGGGAAAGTAGTTAGAAACTCAAGTTTCGATAGACACTGCCTAGATTAGGAAGTATTTTGTAATAACTTTGTCACATCGTATAGGAAGTTTAATCTAAAGTTACAA…
>Cluster-9132.0	F-box	TATCAAACAACTAATTTTCATTTTTATTTTCATTGGATGCACATGTAAAGCTTTGTGAACATTGTGTAGAACACAAATAGACCTAACTACATAAAGTTCTAAACCCGAGTGCATAATATTTAGCACTGTCTTTCCTTTGCAGCATTTCATGGTAGATATACAAATGAATCTTACCATATGTAAATTCAATTTTTGAATCCATACAAACAAAGTCCATTATAAGTGTTGATGCTAATGATATATGCTCTTGAGGCTTTCCAGTGTTTCAACATATTTTACAAGCCCCATATTTCTGTGGATACTGGGAAGATTTTGATATAACACAGGGGTTCCATGAATGCCAAACTCTTTGAATTCACAATCTTCAAACCATGACGAGATTAGTTGCTCCTTGTCATC…
>Cluster-10112.0	F-box	GGAATATGCAAGCACAAGTTGAGAAACAATATGTATGTTTACATTTGTAGATCTTAGTATTGAATCACAAGTAGTATCAGTACTGTTTAGGGCCACACTAAACACAAGGGACAAGAAATGCAAAGTAGGGGACAAAAGGTACAACTGCATATAAGCCTGAAGCATTAACCACACTGGAGAATCAGCATGCAGATAGTATCGTTTGTGGCTCTTGCTGGAGCACAGCAGTAGACATAATCAGAAGCATATGGAAATTACCTATTTCTAATACTTTCCTCAATCCATGTTCTTCCATTTAACTGACTCTCCTAGTCCGCATCAATTGTCCTGGTTTTCTCTTCTCTTTCTTTTTCCTGGTGTGTCTCCTCTTCCTCTTCCTTCTATGCTTATGGTTGGTCT…
>Cluster-5880.0	F-box	CATCAACAAAGAAGGGCCAGCAGTATAAACTTTGAGGAACATATATCTTCCCTCTGTACGGTGTCATCCCAGTCGCGATGGGCTTGAGCAGGTCAGCAAGAAAGGCAGTTGGTAGCACCTGCGCTTTTGAAAATGGCATGCTAGGTATCTCAGACCATGTGCCAGAACAAGGATCAAATACCTCAGCAGATTGAAGGGGAGACAGTGCACCACGACCACGAGTCACACCTCCAACAACGTAAAGCTTGTTATTTAGAACCCCCGTCTTACAATAAGCTCTACCGATAGACATAGGAGTCACTTCACTCCAAGCATTTACAATTGGATTGTAACGCCAGACATTGTTCATGACCAAAGCCCTGGAGAATCCACCCAAGACGTAAAGGCAGCCATCAACAG…
>Cluster-12375.0	F-box	GAAGGTCGTCAGCGTAATCGTAACTGACCTTCCATCTCATGCTGCCGAGCTTGATGAAACCCAAATCACCCTGATTGTAAAGAACCATGACTCGGTCGGAGATGATGACAGCCTTGTCGACGACAAGGGTGCGATCGGTGTCTTTCCTCCTCCTGGAAGTGTTGACGAACTTGGCATTGAAAGCCTTGGAGAGCTCAATCACCCGGAATTGGAGGGAGTCCAGAAGCTTGGGGAAATTGGAGTGGAGGGTTTCCGGCGAGAAGCCCGAAAAGGGGTCGAGGATACGGAGCTTGCCGGAGTGAGTGGTCTCAATGCGGGTGAGCCAAAATGAGGATGAAGGCGGTGTGTTTTGGGGGTTGAAGATGAGATACAGGGCGCTCTGAGAGAGGTTGAAATAAC…
>Cluster-13232.0	F-box	CCCACCACATCAACAAAACCCTGACCAATCTTCCTAAGGGGGTGATCAAGGTCAGTGATGTTACAAAACGTGTCAAAATCAGCACAAGAAAGGTAAGGAGAAGAGAAAATGAAACGAAGGTTTGAATTCCCCAATTGGGTTAGGGTTAGGGTTTGATCAAAATGGAGATTGGCGAAATGAGGGGAGCAAATTATCTGGTACCATAATTTGCATACGCTCTTGAATTGCATTAAGGGTTTCGCTGGGAATCGAAGGAGAATGTCGATCATTAAATCCACAGGAAGGTCCATTAATTCCGCCATATCTCACAAAACTATACTCTTCCTTCGAATTGACACAATATCGAACGATGCAATACCTGAATGGACTTATACAGAGAAAGAAAAGCGAATGGCGATA…
>Cluster-4767.0	F-box	TGCGCATCGGACATCGAGAGAGTAATTCGTGATTGTTATGAGGATGCTCAGATAATCGAAAATGGAGTGGGATTTTCTGGAGGTTCTTGATTCTGATGTGGCTGTTAAAATTCTGAAGTTTCTGGAAGATCCTGCTGATGTTGTCCGTGCTTGTTCAGTGTCGCGATCATGGCGGGATTTTGTGATAGCTAATGGTATATGCAAGCATCTGTGCGTGAAACTGTTTCCACAGTTATCAGGTATTTCTCGTATCATCAATGTAAGTGGCGCAAGGGAGAAGTTTGTGGATGTCGGCTGCAGCAGCACTGGTGAATGGGAGCACTTAAAGTTTGAACACAGGGCTTACACCTCTTTAGCTTGGTGGCTTACTTCATCTGAGGTGGGTGAATGTACCTCCGA…
>Cluster-5676.7202	F-box	GGTACCCAAAAATGTATATATTAATTGATACGTGTACCATTTCCCCAACTACAATATTATTTGAAATTAATAAATAGACACATCTTTTGGGTTAAAAATTGTGCATGTAGTTCAGGGAAAAAACTATCTTTAGAATTGAGGGTTGGAAAAATAATTTCTGTATACTAAGATGAACTATATGTCAATATTCCATTTGACTATATTGATTATTTACAAAACAAAGGACAGTCAAGCAACATAGTTCACAAGATTACCTTCACAACTTCTATCATGCTTAATTTGGATACAAATTAAATTTTTGTAAATGAAAACAAACTTTCCACATAAATTAAACAACTGGCCAATCCTACTCCCAGGCTCTTCATAGTCCGGGTAGCAGTACTATACATAACACACTCA…
>Cluster-3888.0	F-box	CGGGGAAGGGCCGCACCCCAAGGTAGTCGTAAGAGTTCTGTCCAGGTGCCAATATCAAGCCAAAGCAAGGCGCCTTGATAGGGGTGAAGCTCTAGATCATATTAGTAATCTGCCAGATGCACTTATTTGTTGCATTCTGTCTTTTATCCCTACAAAGTATGCTGTTAGAACCAGCACATTGTCAGAGAGATGGAAGAACATATGGACCAAAGTTCCTACAATTGATCTCACATGTATGCCAGTTTTACTAAGACAGAAGACGAAGCAAAATTTCAATAGATTTGTGAATAATGTGCTACTTCAGAATGATGTATCTAATTTACACCATCTACGCTTTTATATCCCTGCTGAAGGACATTATATAACATCAATGTAAACTGATGGCTGGACCTCATAACA…
>Cluster-5676.1505	F-box	TTTTTTTTTTTTTTTTTTTTGGAATGCCTGTACTGCCTGACATTGTGAGAAGAAGCAACCATAGAAAGAACATCTCATTGAAACACGTATACCTTGATTCCACTGTAATTCAAATTCCTGCATCAACCTGTACTTCTGAAAATTTTCACAACTTTAATTACAGCGGCACTTCAAATTCCAAGCCTCAAACATAAAAATCACTAGGACTAACACTAAGAACAAGGACCATGTCTCTGTATCACGTCTATGATCCAGCATACACAACAATATGCATCAGAACAGGCTTTACAGATATCAGCACATTGATTAAACACCAAAAGTGCCCCAGAAAGCAAGACAATGTGCATTCTGGCTGGTGAAGTCGATTGGAAAAGTACAGCTCATATAAATATAGAAAGT…
>Cluster-5676.957	F-box	GGGCATGGCAAGCTGGTGGGCCCAACTAATAGTGTCAAACTTCTATTAATTACATTACGTTACCCCTACAAAAGCTGAATTGAACAATTGTGTATAAACTTTGACAGCAAACGTTGCCACACCATTGTCAGATACTCTGACAGCAGACGTTGTCACACCATTGTCAGTTCTTTTATTGTAACCGTGTTTCCTTAACTCTGTACATTTGCCAACCTCCACCAGCGCCCCCCGCCCCACAAAAAAAAACCGAAAAAAAGGCTCTGCTGGCCATGAGATCTATGCTTAAGCACAAGGCTACATCCAACAACTTATAAGAGTTACCCATGGGAATAATGGATACAACAGCAACATGTACAAATAAGCAAACGTAGTTGAAGAAATACAGAGCAGGGACCAACG…
>Cluster-25363.3	F-box	AGCATGGCCAAAAGGAAAAGGAGTGAATTCAAGGAGATGGACCTTATTGGTAAATTTCCTGATGAAGTGCTTTCTTTGATTGTGTCGCGTCTGCCACTGCAGCAGGCTGTACGGACTAGCATTCTCTCAAAAAGATGGAGACATGTCTGGACGCAGGTGTAATTCTACAATGCCTACAACAGTTGCCCACGTTCGACAGGCTCCAAGAGTTAGTGCTGGATTGTTCGTTGCAGCGGTCTCCTTTTGTCTTAAAGATAGTCTCTTCATGGTTGAAGGCATCTCCATATTTGCAGAAATTACGATTAATACAACCATTCTACACAAATCGGTGTTGTGAAAAACTTGCTTCATGGATGTACAAAAGGTCGGAGGAGTACTTTCACGAGAATTTGAGAGAGG…
>Cluster-5676.9362	F-box	CGTTGGTATTCTTTAATGTGACAACACCCCCACCTTTCTTTTTTCAATTTGTCGAGGCCTTGGAAGATCATTTCCATCTCAAATCTCATTCAGTGCCGCTCGTTTCTCGATTATCCATCCTAATTTAAATAAAAAAAAGGATTCAGACATGGTCTAAAAGATGCGTTTCTCGACGAGCTGATTTAGGCGAAATGACCAAATTTGAGTTTCAATCTCATCATCAAGTCTCCCTTGTTCTTGGCATTACCATCATATACAGAGGTTGAAAGGAGCATAGGAAAGCAGCTGAAATTAGCCACATCCTATCTACAACACAATTCAAACCATGGACGCAACGAGTACGATTTCTGAAGATTTATTGCAAGGAATCTTGTGCAGATTAACAGTGAAACAACTTTT…
>Cluster-5676.9363	F-box	TTGAAATTGTTATTTTAGAATTGACAAAAGAACAGGGCCTAAGATGAAGTATAATTCGGCATCTAATCTTACTCATTGGTTGTACACCCAAACAGAAAAAAGAAAAGAAAAGCAAAGTCAAGCAAGATAGTGCAAAGTACTTCACAAGATTTCCTTCACAACTTTTATCATGTTTAATTTGAATGCAAGATTTTTGAAAATGAAAACAAACTTTCGACATAAATTAAACAACTGGCCAATCCTACTCCCAAGCTCTTCATGGTCCGGGTATTAGGACTATAGATGACACACTCATGTCCGCCTACTGTATTACGTGCACCTGGTCCACCCTGAACAGTGAGCACCATGTCACCGTCGAACAGAAAAGCACTGAACCATAAGCCGTCATATGCTGGGACT…
>Cluster-5676.9980	F-box	ATAAAAATAACACCTTTATTTTGGAGTCTAGAAGACCAAATTACAAGCAATCTTATCTCTATCGATATTCTTATTCATAGAAAGGCTGAACACAATTAATTATCCTCCAACAATTAAAACACAAAGAGTAGTGAAAACGAATCCAACCAAGAAAACAGACCTAATTTTAATTCATAGAAACCCAACATAAATTACAACACAAATTATTATCAACATTCAAAATCCCTTAATACTTAATACAACAAGCTTAAATGCTTTATAATACAGTACCAAAAAATACAAAAAGAAAAAAGAAAATAAAAAGCCCAAACTGGAATGTGTGAACATGATATCTCTCTCATTTGGAACTCCTATTAGCGAAATCCATCTTCGCGTAATACTGAATCGAAAGCAGAGAGA…
>Cluster-5676.2043	F-box	CGCATGTCTTTGAATTGAACATGAATACTGATTATCATATTATGGCCACAATTTCCAGCGAGTCGAGGAGAGGGATTGAGTTGGCCATAAATTCTAGTCAATTTGTTTCTTATTTATGCTTTCTTAAAACTTTTAAGTTGCTCTTGTATTTGTTCGGTTGCAACCTTTCACTACAGTAGACTAATGTTATTAGAAGATGACTTGAGCTAATACAAGATTAGGTAGCCTTTGATGTTCTCCACATGAATAAATGAAAGTTCATCTTATAGCTTCAAAGAGAAAAAAACTAGGGGAATGCTAAAAATTAATATCATTATTGTTCATAGCACATCGGATTGAGAGGTACAAATATTTCAACATATCTTAGAACGCCTTGAGTTCCATATATATTAGGGAAGA…
>Cluster-22085.0	F-box	CGCGGGGTGGCGCCATTTCTTTAGAAATGATGGACAAGACGTACACTATCCAAAATTTCCAGCCACACATCTCCACAATAAGAATTTAAGAAAAACCAAATACAAAAAAATAAGAAAAATCAGTTGAGCGAAGGGTGCCAAAAACATTGCCAACTGACAAGCGATTTGATTTCGAAACGTTGAGACTCGCCTTATTTTATTATCATCATCAAATTCAGCTGTCTCTCTCATCTCCCAGCCACACATATCGCATTTTTCCCAACTTCACTCATTTCTCTTTCTACTTGCCCATCTCCTCAAATTCCACCGTTTCTCTCTCCTGGCCTTCCTTCCATGGCGGACGCCACCTTCTCGAAGCTCTCAGACGACGTCGTTCTCAAGATATTCTTCCATCTCGAA…
>Cluster-10643.0	F-box	ATATCTTGGTGTGTCGCCCCATGTAATGTAAAGATCTCGAGCAGCAACACTATAACACTTCTTGCCCGTTGATTTCTCCAGTGAAAAGCTCTTAGTGCCACCATCGATGAGGAGAGGACGAAAGGCGAGACGAAGAAACAGCTCCTTCTTAGACAGAGAATTCAAGAGCTCAGCGCCGCCGTCGGATCGAGCGACGATGTCGGCGTAATCGGACGGCAGAAAACGGTCCCATACGGCGTCGGAATCAGCGGCGGACTTGAACATTTTCGAGACGGCGGCGAGACGGCATGCGTCACGAGGAGAAGTGAAGGAGATAACGGCGGCGACGCAGCCTTCCGGCAGCTCGCAGAAGCCTATTCCACCGTAGAATATCTCTCCTCCGCCTGTTTCTCTCTCTTC…
>Cluster-19018.0	F-box	CTCTCTCTCTCTTGTTCCTCTTTTTGCCCTGTTCTACAGGGTTTCTTCCATGATCTCTTTTCTTTGATTTTTTTTTTCTCATGCATTCAGCTCTTCTCCTGCCCTTGTTGATTGTCTTTTTCTTGCTTGATCTGCTCCTTTTTGCTCTCATCAGAGGGTTTTCTGGGCTTACGCTGTCTGGATTTGAGGTTTCCACGCTTTTCCCATGTCAGAAGTCTTCGATTTCAGCGATGTTGGTGCTTTTCGCCCAGGGGGTTTTCTCCCAAATCCGAAGGACTCAAATCTGTTTTTGTCTCCTGCCAGCCTTGTCGATCTCTATCTTTTGCCTCGCAAAAGATCTCGGGTCAGTGCTCCATTTGTCGTCTCTGGCGAACCAAAGAAGCAGCCATCGATTGAAGT…
>Cluster-13429.0	F-box	GTGAATTTGGGGGAAATGGCGTTTGTGGAGAAATTTGGTTCGAATGTGACTAGGGCAAATGAAGGATACGGAATGGGCCTGGTGAGGAATGCATCATTTGGGAGAAAGAGGGTTTTTCTGTCAAGTCACAGTATGGATTTTGGGGATGATTATGATTGTACGAGTTTGAAGAGACAGTGCTCTCAAGATTCTATTTTTTGGGGAGAAAAGTCTACACTCGAGGACTTGCCCCAGGAAATTCTGATTAGGATACTCTGTGGTGTGGAGCATGATGATTTGAAAAGGCTGTTTTTTGTGTCGAAGGCGATTAGAGAAGCGACTTTAATCGCAAAGCAATCCCATTTTGCTTACAACACACCGAGGAAGACGGTGGGATTTGAGGATATGGAGTGTGGTGGT…
>Cluster-5676.2239	F-box	GTCTACGGCCAGTATCGAAGCGTACCGGACCTGCACTTCCCCGGTCAACCAGTGCCGCTGCACCGCCACCGCCTTCTGCGACGAGAGGTTCACCGCCCTTCGCCCCACCGGGTCGATCAGAATCCAGCTCAAGCTCATATCTCCGATCATCTCTCTACACTCCTCCTCTTCTTGAGGGTGTTTGATCTGCGTCGGCACCACATCTTTCGGCTCCAGCAGGTCCACTCTGAACGGCGAGCACCGGAACCACCCGCTCACGGTCTCGGTTTCTTGAATCTTCGTGAAGATCAGTTTGCTCTTGTAGTGCACGTCGACGGCGGAGATCAGCTCCTCCGGCGCCGGGGATTGCGACTGGGCGGACAGGTTGCGGTCGGTTGGGATTGGGAAGGCGTGTGAGAA…
>Cluster-15671.0	F-box	TAAAATAACAACCTCACTTATTTTGCCAGAGTCGGACATTGAATTGACTATCAACCTCACTTATGTGCGAAAGCAACAAAAACTGATCTCTTCTCTCACTGCGATAGAATTCAGTGTCCGACTTTGGCAAAACTAGCAGCTATGTCGACGACGTTGTCGACCCAGAAGTTTTGGAAAGTGTGGGGATGGTTCTTAAGTTCATCTAATTCGAATTGGAAGAGCAGTAGAGGAGAATATGTGGGTGAAGACGGAGCTTCCAATTCGACCGGAGACTTTGATCGAATCCCGGATGAAATACTGGCTTTGATAATGAAGAAATTGGGACCCAAAGAGACTGCAAAACTCTGCTTGGTTTGCAAATCATGGAGGGACTTCGTATCCTCAGAGAATCGGCTATGG…
>Cluster-15671.1	F-box	TAAAATAACAACCTCACTTATTTTGCCAGAGTCGGACATTGAATTGACTATCAACCTCACTTATGTGCGAAAGCAACAAAAACTGATCTCTTCTCTCACTGCGATAGAATTCAGTGTCCGACTTTGGCAAAACTAGCAGCTATGTCGACGACGTTGTCGACCCAGAAGTTTTGGAAAGTGTGGGGATGGTTCTTAAGTTCATCTAATTCGAATTGGAAGAGCAGTAGAGGAGAATATGTGGGTGAAGACGGAGCTTCCAATTCGACCGGAGACTTTGATCGAATCCCGGATGAAATACTGGCTTTGATAATGAAGAAATTGGGACCCAAAGAGACTGCAAAACTCTGCTTGGTTTGCAAATCATGGAGGGACTTCGTATCCTCAGAGAATCGGCTATGG…
>Cluster-24602.0	F-box	TGTCCTCGATCTTGATGAGAATCCCAGAGAAGAAACTTGCAATAACGTTGTTGTGACTGCTGGGAAACCTGAGAGCTTCAAAATGCCGGATCCTTATAAGCCTCCACCTAGTAAGAGATCTCGAAAAGATCGAAGTCGAAAGAACTTGGGATCCATGGATTCATCTGAAATAATGGAGCAGGAAATCTGGAAAGAGCTCCCAGAGGACCTTCTGGAGGCTGTCATTGCTAGGCTTCCCATATCTGCATTCTTCCGCTTCCGGTCAGTTTGCCGGAAATGGAATTCATTGCTGGCCTCATGCAGCTTTTCAGAACACTGTGCACAATTGCCAAAACCCCGACCTTGGTTCTACACTATTACACATGAGAATGTGAACACTGCAGCCATTTATGACCCTTC…
>Cluster-5676.9006	F-box	GTCCTGCTCTAGTGGCTGTTCTGTCAATCTGTGCATCTCTCCTCATGAGGTTGGAGAGATCCGACTAATTCAGTTGAAGAAATCGCAAACAAATTTTTTGATTCTTCAATTGCAGCCACTATATGATCATACTTTTGAGGAAGGCAGACGTGATCTAGAATGAGCCCCATCTGGCATTCCTACTCATCACCTATATAAATTACTATCTCTGGGGACAATCCTTAAGGATTCCTATCAGAAGTTTCAGAGACCATCCAATTCTGCCATCTTCCTGAAAAGTCAAGGACGACATCGAAATGGAGGAGGAAGAAAGAGCAGAGGACATGATTATCAATCTGCCCGATGCCATTGTCCATCTAATCCTGTCTTTTGTCCCGACTAAATCTGTGATAACAGCAT…
>Cluster-5676.9768	F-box	AAGAGCTAAAAGACATTACTGTAAAAACAAGTATTATATTGCAAGAGTACAGTTATTGAACAGCATCAATATATACAGTAGCAAATACCAGAAAATCAAAGGTACATATTACAGGGTTGTCACAAAGAGAGTGCAATTATCAACACCACACTTCAAAGCAGACATTCGTGATGCCATTTCTTTTGAACTCCCAGGTGGGAATGATTTGCCCCATCCAGTTTTTGCATTATCCACTGTGGCATAACCATATTCAGATCCTAAAGACATCAGTCTGAAACCGTTCATCGTACAACCTCCAATGACCATACCTCTCGCTGTGGAATACAGATCTGGGAATGTAGAAGTTCGGCTTCTTAACATCCTTCAACTTCTTCAAATTCGCTGTTGCATTTACAATAT…
>Cluster-5676.9769	F-box	AAGAGCTAAAAGACATTACTGTAAAAACAAGTATTATATTGCAAGAGTACAGTTATTGAACAGCATCAATATATACAGTAGCAAATACCAGAAAATCAAAGGTACATATTACAGGGTTGTCACAAAGAGAGTGCAATTATCAACACCACACTTCAAAGCAGACATTCGTGATGCCATTTCTTTTGAACTCCCAGGTGGGAATGATTTGCCCCATCCAGTTTTTGCATTATCCACTGTGGCATAACCATATTCAGATCCTAAAGACATCAGTCTGAAACCGTTCATCGTACAACCTCCAATGACCATACCTCTCGCTGTGGAATACAGATCTGGGAATGTAGAAGTTCGGCTTCTTAACATCCTTCAACTTCTTCAAATTCGCTGTTGCATTTACAATAT…
>Cluster-5676.4452	F-box	CCTCATAGAGTATTCAAGTTATCAGTGACCTTTGAAGGAAGGGGAAAGAAAGCATAGTAGGCAATATGTCTCAAAAACCCAGACAACATAGGGCAAACATTACATTACATGACCAAATTCCAAAGATACAAAGTCGAGGATTGCCTGCCAAACACAACAAGGCAATCCTAACAGCAGAGGCTAAGATCTGAATTTACCAATAGTGAAAGCAAAAGCTCACCAATAGCTAATATACAAATTCTAACACAGACCCAATCCAAAGGGTTAAATACCTGAATAAAAATACCAATCAACCATAACAAGAATTGTCAGTACAACACAACTTGCAGGCAGAAACATACAAACACTGAATGCAAACAGAATACCATGGGTGATCTGCGGTGGGCCCGCCTCACACCT…
>Cluster-18440.0	F-box	ACTTCTACATGGGTCCATAAGCCTGCATAATGGATCATCACTCTCAAAGAACATCAATAATGGATATGAATTATTTGTTCTCCGTCTAGCTGGAGGGGCAACATAATTCAATAGCTTGCATGTGGCTCTAAAGTTTAAATAATCAAATAAATGCAGTTGTTGGGCAACCCGTAGTATTAGGTCATAAGGCAGCTCACACAGTAAGAATCTCTCTGCCCCTTCATTCTCCTCCTGCCCTTGGCAGTGTATAGCATCACAGGACTGACCTAGATAGCCTACTTTCTTATCGTTACACTTTTCGGCGCCTTCTACTGCAAACCTTTGATACTGGGACATAACCCATGTAGGAGGACACGAAAGGGGCGGCAAATTTTGACACGGCAATAAAGATGCCAGGCT…
>Cluster-20446.0	F-box	CTAGCTATCAAATAAATTCTTGCTTTCAGGCTTTCTGTCTCAAAGTCAAGTAGATCGAACTTTCAACTTTAGGAACTGAGGTAACATTCATTTCAAGGAGAGAAAACGGGGAAGCATCACTCACTGGTCAGTGAATTTCTGGAAACTATACAAAGCCAACAATTCCAGTGTCGAACAGAAGGTTGCCACACCTAACAGAGCCTCATCTGTCACATTTGTACATTGTAGCCTTAAGACCTTCAAAAATGGGCATCCTCTAGCAACAGCGAGTACACCTTTATTGTGAATGAACTCTGAGTCCATAGATAAGACCTCCAGATATCTGCAATGGGATCCCACAGCTTCTAAGGCAACATCAGTAATTCTAACACAAGCTGCTATACTTAAAGATTTAAGAGA…
>Cluster-9078.1	F-box	TCTCTCTCTCTCTCTCTCTCACTAGGATTCGGAGATGAGACTGCTCTCTCTCTCCTTCTGGAAAAATCTCTCCTCTCTCACCTTCACAAAGTCCACAAGATACTCTCTCATTACCGCAACTCTGTCATTCCTCACTTCAAGAATGTCCTCTACGAGCAACAGTTCAACCCAGAAGCTCAACAACGCCGCGGTGGAGCCGCCGCCTCCGCCGGAGATGTCGGTGCTGGACTTGCCGGACCTCGTCTTGGAATGCATTCTCGAGAAGCTCCCGCCGGAGGGGCTGTGCACGATGGCGAGCGTGTGCAGCTCGTTGAGAGATAGGTGCGTGAGCGATCATCTCTGGCAAAATCACACCACGAAGAAATGGGGCAGGGTTATTGGAGCTGCTGCGGAGAAGGA
>Cluster-5676.8930	F-box	TCTCACTAGAAGAAATCTGGAAACAGTACCCTTTATAAAACAAAGAGTTCAGATGGTCAAGGTTACAATTTCAATTGCTAAAGATGACGTTCAAAATGAGTATACTACTGGTTTTCTATTATTTTCAAACGTACAAATGTTTCCTCATATCTTAAGATCCTTTGAGTCCCGTGGACGTTTGTAAGGGAATGTTGATCACACATTCCGTAAAAACTATACTCTTTAAATTTTTGATTATCAAAATTAGATGAGATTAATTGTCCATTACTATCACTAAAAAAGATTTCATTATCATATGGAATCCCAATAAACGTCAACCCGGGAACAGGTCCAAACGAGCACAACAATGCCCAAGAATCTTCCACACCATATTCCATCATCATCCAAACAAATGCACCA…
>Cluster-24880.1	F-box	GGAATATGCAAGCACAAGTTGAGAAACAATATGTATGTTTACATTTGTAGATCTTAGTATTGAATCACAAGTAGTATCAGTACTGTTTAGGGCCACACTAAACACAAGGGACAAGAAATGCAAAGTAGGGGACAAAAGGTACAACTGCATATAAGCCTGAAGCATTAACCACACTGGAGAATCAGCATGCAGATAGTATCGTTTGTGGCTCTTGCTGGAGCACAGCAGTAGACATAATCAGAAGCATATGGAAATTACCTATTTCTAATACTTTCCTCAATCCATGTTCTTCCATTTAACTGACTCTCCTAGTCCGCATCAATTGTCCTGGTTTTCTCTTCTCTTTCTTTTTCCTGGTGTGTCTCCTCTTCCTCTTCCTTCTATGCTTATGGTTGGTCT…
>Cluster-5676.964	F-box	CTCACCACTCTCTCTCCTTACCCTTCTCTCTCTGTCTCTCTCTCCTCCTCCCTCTTGAAACGATCCGATCAGATCTCCTTCCTTTGTTCTTCTTATTCATCCGTATGTGTCCATAATCGATTATGTTATCGCAGTTCTTGTAATCGAGTTTCATTTCAATCTGCATCGAAATTGATCCGGAGCTCTTGATTCCACTCGATCCCTCATTTCTAGGGCTTCCAATAGCTCCTCAATTCCCTAATTTTCGAATTATATGGTGTTTTGATTTGACGATCGAGCAGCTAGCTAGGGTTTTGCGGGAGGTTGATTTTTCTGCGTTTGTATGAGGATTTGGTGCTGTCTTCTATGCTTCGGCGACGATAATAGGAGAGAGAGAGGAAAAAGCATGGAAGGTGGCAA…
>Cluster-5676.965	F-box	CTCACCACTCTCTCTCCTTACCCTTCTCTCTCTGTCTCTCTCTCCTCCTCCCTCTTGAAACGATCCGATCAGATCTCCTTCCTTTGTTCTTCTTATTCATCCGTATGTGTCCATAATCGATTATGTTATCGCAGTTCTTGTAATCGAGTTTCATTTCAATCTGCATCGAAATTGATCCGGAGCTCTTGATTCCACTCGATCCCTCATTTCTAGGGCTTCCAATAGCTCCTCAATTCCCTAATTTTCGAATTATATGGTGTTTTGATTTGACGATCGAGCAGCTAGCTAGGGTTTTGCGGGAGGTTGATTTTTCTGCGTTTGTATGAGGATTTGGTGCTGTCTTCTATGCTTCGGCGACGATAATAGGAGAGAGAGAGGAAAAAGCATGGAAGGTGGCAA…
>Cluster-1179.0	F-box	GGTGTATGTACACCCTAAAAAGGAAACAAACAAAACGGAAAGATTAATGACCAACGTTGAGCAACATCCGGTTGCCCGGCCTCCTACAATCAGCGATGGATAACCTCCCGCCACCGCTGACTCTCGAAATATTGAGTCGACTCGCCGATTCATCAGACCTAGCTCGGTGCCGTCTCACCTGCAACACCCTAAATTCTCTCTCCTACGAGGTCACTTCCATCAATCTCATATGCTCTTTCGATCGCTACACCAAATCCCGATCCTCACCCTCCCCCTCCCTCGTCACACCTTTCAAGTCCATCGTCGATGACTTGATCCCTAAGCTCAGCTGCCTTGAGTCGATTTCGATCGGCGTCGACAACGTCATGCAGGAACTGTCCTACGATGATTGCGACGACG…
>Cluster-2429.0	F-box	GTTTGAATGGGGTCATACATTGGGTTTGTAATGCGAATGTGAGTTTTGACGATAATGACTTGGTTCTTAGGTCCATTTTGACATTTGAATTGGGGAGTGGAAACTTTGGGGAAATTGAGCTACCTAAGGAAACGTCGACCGTAAAGAACCAAATGGTTAGAGTCATAACAGTTCCCAGGAGTTGTAATGAAGTGCTAGGAGTCATACACAAGTTTGGCGATTCTTTGAGGCTGTGGGCCATGGAGAAGTATGGTATCAAGGAGTCATGGGCTAAGTTGTTCTGTGTTGACATCGTAAACATAGTTGGGAATGACATAAATGTGGGGTTGATCAGTGAGGAATTTGTTGTAGTGCAAATATTGTTGGGTTACTGGTTCTCCCATCATGTCAGGACTAATG…
>Cluster-7153.0	F-box	CTTAGCCATTATTCTATTGAAATTTCTGGTAACTGTTTTTCCTTTTGGCTTCCCCCCCTCCCATATGATAAAGGAGTTAAGATTTGATGACAAAGCTTAATACTGGCGTTACGTTCGTGCTCCATACAATAATGCAATTTGCCGCTAGCTGCGAGAAAGCCGGATTTGCGCCTAAAATTCCAAGTGTGCTCCATCCTTCAATAGCCATCTCTGTTTGATTATCCTAACTGATACAAGCAGGAGATACCGATTTGCTTACTTTCACCAGGTGACAAGAACGACATGCATCACTTTTCCTTTATGTGAGGAATTATATGCGAAGGAGTGCATGTAGAACAAGGAAGTTGCTGAAATTCACCGCATCTTCCGGACAATTCAGATCACATGGAAGCAAAGAGT…
>Cluster-16691.0	F-box	TAAATCTCTGCTTCTTCCTTCATATTGTTGTAAATGCTAACTTAGATCTAACCTATATCATCTGCAACCTATATATTTTCTTCTTCCTACATCATCCATACAAAACAACTCTTTTCCTACATCATTTGGACAGATGAAAACAGAATCAACACACAGACCACCTTTGGTATGTGTACAATCAATCTGTCTCAAAGAAAACTTGATCCTTGTCATTGCATTTGGATCCTCAACAACAAAATCTCCGACGTGGTAGTGAACCCAGTTTCCTAAACTTCCCAACATGCAACGCGATGCTGCATGCTGACCATCTTGTGTCTTCAACTGAAACTGTGCAGGTTTTACATCCCATCCATGGACATTCTCAGAACCACATGCTCGACGGCCTACTCTCTTAGCAGC…
>Cluster-4323.0	F-box	TTGTAACTTTATAATGGTTAGTGATGCAAAAAGTCCTCAGAAAAGGAGAAAATCGGGACAAAAAGAGTCGATTCAAATCCATTGTCTACCAGATGAGTCGTTGCTCGAAATTTTGTGTCGACTCCCCTGCAGCAAGTTTGTCACCCAATGCACGTTTGTTTGCAAGCGTTGGGCTTCTTTGATTTCCCGTCCCCTCTTCCTTGGTTGGTTTATTGCTGATAAAGGTAAACATCAGGTGTTTTCTACTCTAGTCCTCGTTCATCCTAGCGGTAAAAACAAGGATACATGAAAGGGGATGATGATTTATTTGAAAGATCCAGTTTTCAACATAGACAACTCGTTTTCCTCTTCCCTCCCGAGTTTAAAAGATGAAATGCAACTGCTTTGATTGTGCA
>Cluster-5676.1866	F-box	TTCAAATCTAATTACATTGGCGTTTATGCATATCTCGGCAAACAAAAAGGAGAAATATTGGCTCCAACATCGAGTCTTTTAACGTCATAAATCATCAGAACGGTTGAATGCAAACACATTTACATTGAACAATGACAGCTAGAAATTAGCTTCCTGAAGGGCAATTTATACCATGAGAAGTGGAGAGAATATACACATGATAAAGAATACAAAGAAAATGAATTAAATTGACACACATTTACAACTAATGACTTGCATTTCAGAGGAAATAATGGGCAAAGATGAACCTGCCCTCACAACAGGGTGACCAACGTCGCTGACATCAAAGATAACTGTGCTAAGCCCTTTGCCAATGATGAAGATATTTCTGTCAATAGCCACCATTTGGCAGGGAGGTCT…
>Cluster-5676.5576	F-box	GTTTCTCTCTCTCTCTCCGCCCCTCCTTCCCCTCTTCATTCCTTACCAATTCATTCATTCGTTATTCACGACCCCTTCTATTTCTCTCTCTACCCTCATCCCCTCGGATTTCTCTCAACCTCCTTGTTCTTCATCGTACGGATTCGGATCGTATTCTCAGGTGACTTCGTCCAATCTCGCACTTTTTCTTGATTTCTTTCTTTTTTGGTGCCGAGAAAAAGGGAAAAAATTAGGGTTTTGGGTCAGTCGTCGGGACTGTTGTGTCATTGTTCCGATTCGATTGGATTCGTACTGGTATGGATTGATTGATTCTAGACGTATATTTGTAATTCTTTGATGACGGATTAGGGTTTCTTTCTTAGTTCCTTTTTCCCCCAATTTTGCCATGTCGTACCCAAG…
>Cluster-5676.6008	F-box	TAACTTCTAGGTTTGTAGCCCCTATCTATTGAAATTCTTGATTGTCATCTTCCTTTTTGCCTATTTTGTCTCCCATCTTTGAAGGGAAGTTGAGACTTAGATGCACATGCCACCATTGATGCTCTTTACTATTATTTTAATTATCGATTTGTGGAGGACTTAGAAGAGCGTTCATGCACGAAATGCAAATTTTAACCATTTTCAATCCATGCAGAACTCTCTCTTTCTAGGACGTCATGTCAAAGACGAAAAGAGAACAAAAAGAAACGTTTAGCATGTTCAATAGCACAGTTTATTATTAAGAGGATGGAAGAAATGAGTACATTTTCTGATGATCTATTGGAGCAAATACTATGTAGATTGACAGTGAGACAATTATTGCAATTCAGATGTGCTAGT…
>Cluster-5676.6009	F-box	AAAAAAAAAAAAAAATAAAAAAAAGAAAAAGAAAAAGAAGATAAACTTAACCTCTAAGCTTTGCCAGCCAGTGTGCCCCTTCACCGCCTATATAAATCCACCCGCCACCGAACACCCCCATCCATCCTCTTCATTGTCTCCACTCTCACCGACCGACCCCCTCCCCAAACCCACATCCTAGAGAGAGAAACTCCGGCAGAGAGAGAGCAACATCATCAGCAGCAGCAGCTATGGCTGGGAAATCACCGAGAGTTTCTGGCTATGGCTATGGCGATTGCGATTGCGATGGAAATGGTGATGAGATTTTCTGTGGCATCGATTTCTTCCATGTTCTTCCAGAAGGATGCATCGCCGTCATCATCTCCTTCACCAGTCCCCGTGATGCGTGCCGCCTTGCGT…
>Cluster-17329.1	F-box	GGATCTAAATGCCTTGCATGTGGCTCGGAAGTTTATGTAATCAAACAAATGCATATGCTGTGCAACTGATGCTATCAAGTCAAGAGGAAGCTCAGACAGTAATAACACATCATTCTGCTTTTGCTCGTCAAAGATAAGGCTGAGTGCATCTGAACTTTCCGATATTTTACTTAGGTAGGATCTAAGTTGGATGTGCTGCTCATTTTGCTCTTCTAGCACTTGGCACTGTACCGCACCTGAACCTTGCTTTAGGAGGCATACTTTCTCAATACAATGCTCATATTCATATTGAGCTAATCTTTGATACTGAGGCATGAACCAAATAGGCATGTCCCAAAATGAAGGTAAGTTTCGGCAAGGCAGTAAAGATGTAAAGCTTTCATCTTCTAAGTTGTACGA…
>Cluster-5676.8985	F-box	GTGACAACCAGGGTCATTACTCATTAGACTATCCACAAAACAGATCTAGAATTAAGATAACAAAGGTTGATTGGCGTCCACTAAAAGGCAAACAGAACAATAAGATGTATCGTTTTGTAATAAGGTGAAACTGTGGAAGCATACTGGTCTTATAGAGTCTAACAATATTTCCACCTGTACAAACCCATAATTTCCATTCGTATGATGGAAGCATAAATTGGTGCCTTGTGTTAGTGTGCTTTCATGTTCATGTGCACGAGATGAGGACTTAATTTCCTAGCTCAGATAACTCAAACGTAACAGCGTCTTGGCTAATGGCTTTGATAAGTTCAAGGCTTGGAATGAAGACCAGCTGAATTTTTTAACCTAGCTTGATGAAGGAGCACAGGAACTTGAATC…
>Cluster-5676.8984	F-box	GTGACAACCAGGGTCATTACTCATTAGACTATCCACAAAACAGATCTAGAATTAAGATAACAAAGGTTGATTGGCGTCCACTAAAAGGCAAACAGAACAATAAGATGTATCGTTTTGTAATAAGGTGAAACTGTGGAAGCATACTGGTCTTATAGAGTCTAACAATATTTCCACCTGTACAAACCCATAATTTCCATTCGTATGATGGAAGCATAAATTGGTGCCTTGTGTTAGTGTGCTTTCATGTTCATGTGCACGAGATGAGGACTTAATTTCCTAGCTCAGATAACTCAAACGTAACAGCGTCTTGGCTAATGGCTTTGATAAGTTCAAGGCTTGGAATGAAGACCAGCTGAATTTTTTAACCTAGCTTGATGAAGGAGCACAGGAACTTGAATC…
>c13018_f1p0	S-RNase	GCCTTCTACAATGGCGAAGACAATCATTACTCTTATTCTACTATCTTTGCTTGTGCCTTGTTTCCTTTCCTACGATTACATGAAGTTTGTGCAGACATGGCCGCCAACTCATTGTACCATAAAGCCTTGTTCAACTCCTATCATACGAAATATGTTCACCATTCACGGTATTTGGGAAGCCTACAACAGTCCCCTGCGCCCACCTCCTTGCATAAGGACTAGCTTTTCCTTGGCTGCGGTGCACAACCTGGAGCCGCAATTGAATGCCAGCTGGCCCTGCCTGAGAAATCGAATTAACAACCAGTGGTTGTGGAAGCACGAATGGGATGAACACGGGATATGTTTGCAGCCAACACTCACCGTGACGACATATTTCCAACTGGGCCTTCATTTGAAAAA…
>c12594_f1p1	S-RNase	AAAAAACACACGCTCAGAGAAAGAGAGAGGGGATGAAAATATCCAGTTTTATCTCCAAGCTTTTGGCTATTGAGCTTCTGTTTGCAGCATCAGCATCAGCACTTTCTCAAGATTTTGATTTCTTCTACTTCGTCCAACAGTGGCCAGGATCCTATTGTGACACAGAGCAGAGCTGTTGTTACCCAACCACGGGGAAACCACCGGCAGATTTTGGGATTCATGGGCTTTGGCCCAATTACAATGATGGGTCATACCCATCCAACTGTGATCCCAACAGCCCATTTGACCCATCTCAGGTGTCTGATCTGTTGAGTAGATTGCAAAGCGAATGGCCAACATTATCTTGCCCAAGCAACGACGGTCTAAATTTCTGGTCTCATGAGTGGCAAAAACATGGCA…
>c69410_f5p11	S-RNase	GTCAACCAACCCATAAATCACAACTGCAGTTCACAGATAGGGGGGACTGGCAAAAATGGGGAGCTCAATGTTGATGCAGCTGCTTGTAATTCTTAGTTTATCCACTGTTTCTTTAAGCACCAGCAATGGCGATTTCCATTTGTTCTACTTTGTACAGCAGTGGCTGGGATCATACTGTGACCAAAGAGGGACGAGATGTTGCTACCCACCAACTGGGAAGCCCAGACCCGACTTTACAGTGTATGGGCTCTGGCCTTACTACAACGATGGCACCTTCCCTTACAACTGTGGCAGTGACAACTTTGATGAAGCTATCCTTAAGCCCATGCAAGGAAGTCTAAGACAAGCATGGCCGTCTTTCACATGCCCACAAATAGGGAGGAAGTTCTGGGTACACGA…
>c68720_f1p2	S-RNase	CATACTGCAAGTGCAAGAAAACATACCAGAAAGAGAGAGGAAAAATGAGGAATAGCTCAACGATGATCAAGCTCCTAGTGGTGCTAAGTTTGGCTGGGGTGGCTCTTTGCAAGTCTAAGAAGCACCACGATGATGATACTCCTTCTAACAACGAGGGTGATTTTCATTTCTTTTATTTTGTGCAGCAGTGGCCAGCATCATACTGTGATACAAAAGGGCATAAATGTTGCTTCCCAGATGACGTAAAGCCGTCGGCAGATTTCTTCATTCACGGTCTGTGGCCTAATTACAATGATGGCAGCTATCCTTCTAACTGTGACTCCAGCAACTCCTTCGATGAATCTCAGTTGGATGATTTGGAGAGTAGGCTGCAAACAGAGTGGCCATCGTTCACATGCC…
>c95806_f1p0	S-RNase	ATTCAAGAAGTTGGTCCAACTACGAAATCCCTCCATTGTCAAGGTCTGAGTAGCACGAAACCATCTTCAAGAATCCATCCATGGCTTCCATGCTCGCCATAGCCATTCTCTCTCATCTACTTCTTGCCTTCTGTATTGCTTCTTCTGCAATTAGCTTTACCGGAGTCAATGGCGATGGAGCTATTGGTATTAATAAGCAGAGAGAGTTCGATTACTTCATCCTTAGTCTCCAATGGCCCGGCACCTATTGCCGGGGAACCAGGAGGTGCTGCAGCAAAAATGGCTGTTGTCGTGGGGAAAATGCTCCTCTGCAGTTCACAATCCATGGCCTTTGGCCTCAGTACAATGATGGAGGCTGGCCTTCTTGCTGCACTAATTCCCAATTTGACATGAAACAGA…
>c1807_f2p0	S-RNase	ATCCTATCTGCTATTTGTAGGGAGGGATAAAGACGAAGAAATTAAGAGAGAGAGAGAATGAGGAAAGGGGGAAGCTCCAACTCCATGTTGGTGATTAGACCACTTGTGATGCTAAGTTTAGCAACAGTAGCTCTCAGCAGCAACAATGGCGACTTCCACTTGTTCTACTTTGTGCAACAGTGGCTGGGATCATACTGCGACCAAAATGGGGAAAAATGTTGCTACCCACCAACAGGGAAGCCACCTGCCGATTTCACCATTTACGGCCTTTGGCCTTACTATAACGATGGCACCTTCCCTTACAACTGTCGCGGGGGCAATTTTGATGAAGCTCTGCTAAAACCCATGCAAGACAGCCTGAGAAAAGAGTGGCCATCCTTCACATGTCCAAAGATAGGA…
