# Supplementary material for: Global transcriptome dissection of pollen–pistil interactions induced self-incompatibility in dragon fruit (Selenicereus spp.)
Source: PeerJ. 2022 Nov 1;10:e14165. doi: 10.7717/peerj.14165 (PMC9635355; doi:10.7717/peerj.14165)
Supplement: Table S7 [file peerj-10-14165-s015.xlsx]

## Sheet: Supplement Table 7
Table S7. Hub genes of the overlapped 534 DEGs co-expression network
ID	Degree	Gene name	reference
c37611_f1p1	449	F-box	Kim JH, Kim MS, Kim DY, Amoah JN, Seo YW (2021) Molecular Characterization of U-box E3 Ubiquitin Ligases (TaPUB2 and TaPUB3) Involved in the Positive Regulation of Drought Stress Response in Arabidopsis. International journal of molecular sciences 22, 13658.
c30021_f1p0	435	YABBY 4/YABBY 5-like	Massonnet M, Cochetel N, et al. (2020) The genetic basis of sex determination in grapes. Nature communications 11, 1-12.
c131771_f1p0	421	xyloglucan galactosyltransferase XLT2	Massonnet M, Cochetel N, et al. (2020) The genetic basis of sex determination in grapes. Nature communications 11, 1-12.
c28784_f2p0	412	PELPIII	Hegedűs A, Lénárt J, Halász J (2012a) Sexual incompatibility in Rosaceae fruit tree species: molecular interactions and evolutionary dynamics. 56, 201-209.; Schultz CJ, Rumsewicz MP, Johnson KL, Jones BJ, Gaspar YM, Bacic A (2002) Using genomic resources to guide research directions. The arabinogalactan protein gene family as a test case. 129, 1448-1463.
c62321_f1p0	408	serine/threonine-protein kinase isoform X2	Nie S, Wang R, Li R, Zhang M, Zhang L (2019) Transcriptomic analysis identifies critical signaling components involved in the self-incompatibility response in Chinese cabbage. Scientia Horticulturae.
c106266_f2p1	405	Cysteine-rich receptor-like protein kinase	Abhinandan K, Sankaranarayanan S, Macgregor S, Goring DR, Samuel MA (2021) Cell–cell signaling during the Brassicaceae self-incompatibility response. Trends in Plant Science.
c1725_f3p0	403	ferredoxin-like protein [Trema orientale]	Huang H, Ho M, Chang H, Chao H, Ger M (2020) Overexpression of plant ferredoxin-like protein promotes salinity tolerance in rice (Oryza sativa). Plant Physiology and Biochemistry 155, 136-146.
c96768_f1p3	401	Leucine-rich repeat extensin-like protein 4	Hegedűs A, Lénárt J, Halász J (2012a) Sexual incompatibility in Rosaceae fruit tree species: molecular interactions and evolutionary dynamics. 56, 201-209.; Schultz CJ, Rumsewicz MP, Johnson KL, Jones BJ, Gaspar YM, Bacic A (2002) Using genomic resources to guide research directions. The arabinogalactan protein gene family as a test case. 129, 1448-1463.
c104651_f1p2	399	U-box,Functions as an E3 ubiquitin ligase	Kim JH, Kim MS, Kim DY, Amoah JN, Seo YW (2021) Molecular Characterization of U-box E3 Ubiquitin Ligases (TaPUB2 and TaPUB3) Involved in the Positive Regulation of Drought Stress Response in Arabidopsis. International journal of molecular sciences 22, 13658.
c27095_f28p9	397	Aquaporin PIP	Ikeda, S (1997) An Aquaporin-Like Gene Required for the Brassica Self-Incompatibility Response. Science 276, 1564-1566
c11294_f2p1	387	F-box
c8397_f1p0	385	glycosyltransferase-like protein gnt13 [Camelina sativa]
c28491_f3p0	377	F-box
c40191_f3p3	375	Carboxylesterase 18
c167649_f1p0	363	Zinc finger protein CONSTANS-LIKE 5
c35469_f4p8	361	UDP-glucose 6-dehydrogenase 5
c64969_f1p0	359	Phaseolus vulgaris hypothetical protein
c101971_f1p4	357	Lamin-like protein
c30348_f1p2	355	ATP-citrate synthase beta chain protein
c68162_f1p1	354	Chorismate synthase
c3121_f1p0	353
c103948_f3p3	352
c40933_f4p2	339
c6194_f1p9	335
c169357_f1p1	333
c60820_f2p1	328
c64608_f2p3	325
c99718_f1p6	324
c132605_f1p3	315
c64118_f1p1	313
c62305_f1p1	312
c68356_f1p0	312
c72779_f1p1	309
c41161_f1p3	308
c28176_f9p8	307
c102034_f1p0	299
c204508_f1p0	298
c162987_f1p0	294
c165026_f1p1	292
c32503_f3p1	291
c167218_f1p3	289
c41235_f1p0	285
c131143_f1p3	284
c9628_f1p0	273
c94632_f1p0	272
c71338_f1p1	268
c30422_f4p2	267
c73086_f1p0	262
c100046_f1p0	258
c193248_f12p25	256
