# Supplementary material for: Global transcriptome dissection of pollen–pistil interactions induced self-incompatibility in dragon fruit (Selenicereus spp.)
Source: PeerJ. 2022 Nov 1;10:e14165. doi: 10.7717/peerj.14165 (PMC9635355; doi:10.7717/peerj.14165)
Supplement: Table S8 [file peerj-10-14165-s016.xlsx]

## Sheet: Supplement Table 8
Table S8.Hub genes of the overlapped 132 DEGs co-expression network
ID	Degree	Gene name	Reference
IS132-hub-genes
c161600_f1p9	129	Beta-galactosidase 14	Wanyi Y, Jin W, Yanan W, Xun W (2019) The activity changes of cell wall degrading enzymes in blueberry fruits during the different post-harvest storage temperature. In '2018 7th International Conference on Sustainable Energy and Environment Engineering (ICSEEE 2018)'. (Atlantis Press)
c28368_f3p4	129	120k Da/(The role of leucine-rich repeat proteins in plant defences)Pollen self-incompatibility and species incompatibility may also be viewed as forms of defence. It would not be surprising if the parallels between resistance and pollen incompatibility extended to the involvement of LRR proteins in both processes.	Hegedűs A, Lénárt J, Halász J (2012) Sexual incompatibility in Rosaceae fruit tree species: molecular interactions and evolutionary dynamics. 56, 201-209.; Schultz CJ, Rumsewicz MP, Johnson KL, Jones BJ, Gaspar YM, Bacic A (2002) Using genomic resources to guide research directions. The arabinogalactan protein gene family as a test case. 129, 1448-1463.
c1947_f8p6	129	Unknow
c7984_f1p0	129	Unknow
c103690_f1p1	128	Unknow
c205802_f1p2	128	Unknow
c9808_f1p3	128	Fasciclin-like arabinogalactan protein	Pereira AM, L LA, Sílvia C (2016) Arabinogalactan Proteins as Interactors along the Crosstalk between the Pollen Tube and the Female Tissues. Frontiers in Plant Science 7, 1895.;Lin S, Dong H, Zhang F, Qiu L, Wang F, Cao J, Huang L (2014) BcMF8, a putative arabinogalactan protein-encoding gene, contributes to pollen wall development, aperture formation and pollen tube growth in Brassica campestri…
c127787_f1p9	128	pectinesterase/pectinesterase inhibitor	Wanyi Y, Jin W, Yanan W, Xun W (2019) The activity changes of cell wall degrading enzymes in blueberry fruits during the different post-harvest storage temperature. In '2018 7th International Conference on Sustainable Energy and Environment Engineering (ICSEEE 2018)'. (Atlantis Press)
c70692_f1p1	128	pectinesterase/pectinesterase inhibitor	Wanyi Y, Jin W, Yanan W, Xun W (2019) The activity changes of cell wall degrading enzymes in blueberry fruits during the different post-harvest storage temperature. In '2018 7th International Conference on Sustainable Energy and Environment Engineering (ICSEEE 2018)'. (Atlantis Press)
c99737_f1p2	128	pectinesterase/pectinesterase inhibitor	Wanyi Y, Jin W, Yanan W, Xun W (2019) The activity changes of cell wall degrading enzymes in blueberry fruits during the different post-harvest storage temperature. In '2018 7th International Conference on Sustainable Energy and Environment Engineering (ICSEEE 2018)'. (Atlantis Press)
c126764_f1p5	128	pectinesterase/pectinesterase inhibitor
c825_f9p3	128	Proline-rich receptor-like protein kinase PERK5
c106146_f1p0	127	rhamnogalacturonate lyase
c127680_f1p3	127	Expansin-A23
c167237_f1p1	127	aspartic-type endopeptidase activity
c167802_f1p8	127	pectinesterase/pectinesterase inhibitor
c1860_f2p0	127	Calmodulin-like protein 7
c30074_f2p2	127	membrane lipoprotein lipid attachment site-like protein, putative (DUF1223)
c4376_f1p1	127	Neurotransmitter-gated ion-channel transmembrane region
c92884_f6p4	127	Endoglucanase 16
c101110_f1p3	126
c138141_f1p3	126
c167907_f1p2	126
c63851_f1p0	126
c6777_f3p0	126
c12076_f2p4	125
c1488_f1p9	125
c29732_f8p8	125
c64455_f1p2	125
c6748_f2p2	125
c165004_f1p0	124
c29423_f1p1	124
c133384_f1p0	123
c1362_f3p0	123
c37134_f1p0	123
c10943_f1p2	122
c60699_f7p7	122
c36043_f2p3	121
c60862_f6p2	121
c61283_f3p1	121
c62218_f2p0	120
c8173_f1p0	120
c60929_f2p1	119
c31297_f2p2	116
c67917_f1p1	116
c206310_f1p1	115
c205217_f1p0	114
c205477_f1p0	114
c1386_f5p1	113
c189288_f11p22	113
