# Supplementary material for: Global transcriptome dissection of pollen–pistil interactions induced self-incompatibility in dragon fruit (Selenicereus spp.)
Source: PeerJ. 2022 Nov 1;10:e14165. doi: 10.7717/peerj.14165 (PMC9635355; doi:10.7717/peerj.14165)
Supplement: Table S9 [file peerj-10-14165-s017.xlsx]

## Sheet: Supplement Table 9
Table S9. Sequences of the 4 un-annotated genes
>c1947_f8p6
AAGCTCTCATCAAGGCCAACAGGAATAAAAAACAAGAATAAGGGGCTCTTCCCTTCTGCCTCTCACCTCCAAGGACTTGCCCAGTCGTTTGAGTTACCAGTCTCTTTAGCGATCATGGGCGCCTGTGCTAGCAAACCCAAGACTCTAGACAATGACAAGCCTTACCCCATTGAGGCTCCTGAAGAAGTTGACACCAGCAAGGCAGCACAGGAAAACAAGGGAGGTGAAGAGACAAAGGAAACAGATTCCTCAATAGAGCAGTCTCAACCTAAAGAGGAGACAGAAGAGTCTTCGATGTCAAAGCCTGATGAAAATCCTGTAGAAGAGAAGGTCATGGAAACCAACACTGAAGACAAGGCCCCAGAGGCTAAGGTCGAGGAGAAAGTTGGGGAGGATAAG…
>c7984_f1p0
AAGCAGTTCGATTTACAATTACTTTAGAGGTGGTTTCTGTTACTGACATATACTTGTATAACTGAGCATGGAAGGCCACAAAATGACTAGTCTTTTGGTGGTTGCATTTATCATTTTAGCAACACACACAAACAATGTTCTTGCAAAGAATATTAAATCCGTGCAAAAGGATGAACAATTGCTTCAACAAAAGTTACCTTTGTGGTCGGCTTTGAAGCAATGTATAGACAATTGCCAACGTGAAAATCGTGATTGTCCAAATGCATGTCTAAAGGATATCGCCGGCAAGGATCAAGCTGCTTTTGTCCAGTTTCTCAAAGAAGGTCAGGCCGCTTCTAGAGGAATATTTTGCATAGCTGGTTGCGTTGCCACTGAAAGTTGTCAAATCGTTGATGCAGG…
>c103690_f1p1
ACAAGCGGTTCAATTTACAATTAATTGAGAGGTGGTTTCTGTTATTGACATATACTTGTATAACTGAGCATGGAAGGCCACAAAATGACTAGTCTTTTGGTGGTTGCATTTATCATTTTAGCAACACACACAAACAATGTTCTTGCAAAGAATATTAAATCCGTGCAAAAGGATGAACAATTGCTTCAACAAAAGTTACCTTTGTGGTCGGCTCTGAAGCAATGTATAGACAATTGCCAACGTGAAAATCGTGACTGTCCAAACGCATGTCTAAAGGATATCGCCGGCAAGGATCAAGCTGCTTTTGTCCAGTTTCTCAAAGAAGGTCAGGCCGCTTCTAGAGGAATATTTTGCATAGCTGGTTGCGTTGCCACTGAAAGTTGTCAAATCGTTGATGCA…
>c205802_f1p2
CAAAATAAGCAACAAGTTCACAAGAAAGGTTATTCCGAGGGTTGGGGTATTCATCTACCATTTCCAACTCCTAATAAAAAAATTAAACAATAAACACTAGTCTGCTGGTAAAAATGGAGATGAAGAAGGTTGTTCTTGCCGTGATCGTTGTTGTCGCCTCAATCAGCATGGCAGCTGCAGGAATGCATACGGCGTCCCCAGTTCACGACGCATCCCCAGCCCCAGGACTCGCCCCAGAAGCAGCTGAAAATGCCGGTGCCTTTGGTGCCTTCCCAAGTATAGGCTCATTGGTTGGGGCTTCTCTTATGACACTTGTTGCTTACTATTACAACTAAATAAGCTTGTTTATCTGCCCTTTGCAATATTAGAATTCTAAGGCAACTCCAGCCTTACCATTAC…
