# Supplementary material for: Global transcriptome dissection of pollen–pistil interactions induced self-incompatibility in dragon fruit (Selenicereus spp.)
Source: PeerJ. 2022 Nov 1;10:e14165. doi: 10.7717/peerj.14165 (PMC9635355; doi:10.7717/peerj.14165)
Supplement: Table S10 — In total, 44 genes shared between them have been labeled as “shared” [file peerj-10-14165-s018.xlsx]

## Sheet: Supplement Table 10
Table S10. Top 50 hub genes of co-expression network DF214 and green module. In total, 44 genes shared between them have been labeled as "shared"
Green module						DF214
ID	Degree					ID	Degree
c127787_f1p9	437	Shared				c161600_f1p9	137	Shared
c28368_f3p4	436	Shared				c28368_f3p4	136	Shared
c103690_f1p1	435	Shared				c1947_f8p6	135	Shared
c126764_f1p5	435	Shared				c205802_f1p2	135	Shared
c127680_f1p3	435	Shared				c7984_f1p0	135	Shared
c205802_f1p2	435	Shared				c9808_f1p3	135	Shared
c7984_f1p0	435	Shared				c103690_f1p1	134	Shared
c4376_f1p1	434	Shared				c127787_f1p9	134	Shared
c825_f9p3	432	Shared				c167802_f1p8	134	Shared
c1947_f8p6	431	Shared				c70692_f1p1	134	Shared
c106146_f1p0	429	Shared				c99737_f1p2	134	Shared
c30074_f2p2	429	Shared				c106146_f1p0	133	Shared
c167802_f1p8	425	Shared				c126764_f1p5	133	Shared
c167237_f1p1	424	Shared				c1860_f2p0	133	Shared
c70692_f1p1	424	Shared				c825_f9p3	133	Shared
c99737_f1p2	424	Shared				c127680_f1p3	132	Shared
c6777_f3p0	421	Shared				c167907_f1p2	132	Shared
c161600_f1p9	419	Shared				c30074_f2p2	132	Shared
c64455_f1p2	417	Shared				c4376_f1p1	132	Shared
c165004_f1p0	416	Shared				c92884_f6p4	132	Shared
c9808_f1p3	416	Shared				c101110_f1p3	131	Shared
c1386_f5p1	415	Shared				c167237_f1p1	131	Shared
c60862_f6p2	414	Shared				c63851_f1p0	131	Shared
c8173_f1p0	412	Shared				c1488_f1p9	130	Shared
c1860_f2p0	409	Shared				c29732_f8p8	130	Shared
c36043_f2p3	409	Shared				c138141_f1p3	129	Shared
c189456_f2p2	408	Unique				c37134_f1p0	129	Shared
c67917_f1p1	408	Shared				c12076_f2p4	128	Shared
c69463_f1p1	407	Unique				c36043_f2p3	128	Shared
c101110_f1p3	406	Shared				c6748_f2p2	128	Shared
c138141_f1p3	406	Shared				c6777_f3p0	128	Shared
c92884_f6p4	406	Shared				c133384_f1p0	127	Shared
c167907_f1p2	404	Shared				c1362_f3p0	127	Unique
c6748_f2p2	404	Shared				c29423_f1p1	127	Shared
c2239_f3p1	403	Unique				c60699_f7p7	127	Shared
c61283_f3p1	401	Shared				c60862_f6p2	127	Shared
c29423_f1p1	400	Shared				c64455_f1p2	127	Shared
c133384_f1p0	398	Shared				c10943_f1p2	126	Shared
c63851_f1p0	396	Shared				c165004_f1p0	126	Shared
c12076_f2p4	385	Shared				c62218_f2p0	126	Shared
c29732_f8p8	385	Shared				c60929_f2p1	124	Shared
c62218_f2p0	382	Shared				c61283_f3p1	124	Shared
c162704_f1p1	374	Unique				c8173_f1p0	124	Shared
c37134_f1p0	374	Shared				c67917_f1p1	122	Shared
c60929_f2p1	372	Shared				c189288_f11p22	118	Unique
c1488_f1p9	371	Shared				c206310_f1p1	118	Unique
c1614_f2p0	371	Unique				c31297_f2p2	118	Unique
c2060_f2p0	371	Unique				c205217_f1p0	117	Unique
c10943_f1p2	369	Shared				c1386_f5p1	116	Shared
c60699_f7p7	369	Shared				c205477_f1p0	116	Unique
