# Supplementary material for: Global transcriptome dissection of pollen–pistil interactions induced self-incompatibility in dragon fruit (Selenicereus spp.)
Source: PeerJ. 2022 Nov 1;10:e14165. doi: 10.7717/peerj.14165 (PMC9635355; doi:10.7717/peerj.14165)
Supplement: Table S11 — They share 27 genes in common that have been labeled as “common” [file peerj-10-14165-s019.xlsx]

## Sheet: Supplement Table 11
Table S11. Top 50 hub genes of co-expression network LAP982 and turquoise module. They share 27 genes in common that have been labeled as "common"
LAP982				Turquoise module
ID	Degree			ID	Degree
c37611_f1p1	452	Shared		c131771_f1p0	1327	Shared
c30021_f1p0	443	Shared		c167649_f1p0	1323	Shared
c131771_f1p0	427	Shared		c104651_f1p2	1270	Shared
c28784_f2p0	414	Shared		c162987_f1p0	1240	Shared
c62321_f1p0	414	Shared		c30348_f1p2	1238	Shared
c106266_f2p1	409	Shared		c36544_f1p2	1234	Unique
c96768_f1p3	409	Shared		c37611_f1p1	1213	Shared
c104651_f1p2	406	Shared		c164956_f1p3	1210	Unique
c1725_f3p0	406	Shared		c62321_f1p0	1201	Shared
c27095_f28p9	400	Shared		c96768_f1p3	1200	Shared
c11294_f2p1	387	Shared		c94632_f1p0	1169	Shared
c8397_f1p0	386	Shared		c30021_f1p0	1148	Shared
c28491_f3p0	382	Shared		c97206_f1p0	1142	Unique
c40191_f3p3	375	Shared		c169046_f1p0	1112	Unique
c167649_f1p0	368	Shared		c167218_f1p3	1104	Shared
c35469_f4p8	368	Shared		c129117_f1p0	1097	Unique
c64969_f1p0	362	Shared		c66044_f1p1	1064	Unique
c30348_f1p2	361	Shared		c28784_f2p0	1056	Shared
c101971_f1p4	360	Shared		c106266_f2p1	1045	Shared
c68162_f1p1	357	Shared		c1725_f3p0	1044	Shared
c103948_f3p3	356	Unique		c71338_f1p1	1041	Shared
c3121_f1p0	354	Shared		c130137_f1p7	1005	Unique
c40933_f4p2	347	Shared		c61984_f1p0	1000	Unique
c6194_f1p9	338	Shared		c34653_f1p0	987	Unique
c169357_f1p1	336	Unique		c102843_f1p1	985	Unique
c64608_f2p3	329	Unique		c8397_f1p0	979	Shared
c60820_f2p1	328	Unique		c27095_f28p9	973	Shared
c99718_f1p6	324	Unique		c35469_f4p8	972	Shared
c64118_f1p1	319	Unique		c40933_f4p2	969	Shared
c62305_f1p1	317	Unique		c93415_f2p6	968	Unique
c132605_f1p3	315	Unique		c64969_f1p0	963	Shared
c41161_f1p3	312	Unique		c28491_f3p0	962	Shared
c68356_f1p0	312	Unique		c103701_f1p0	946	Unique
c72779_f1p1	309	Unique		c30920_f3p0	944	Unique
c28176_f9p8	307	Unique		c11294_f2p1	943	Shared
c162987_f1p0	304	Shared		c101971_f1p4	942	Shared
c102034_f1p0	302	Unique		c9194_f1p1	938	Unique
c204508_f1p0	298	Unique		c61179_f2p1	936	Unique
c167218_f1p3	296	Shared		c62262_f1p2	913	Unique
c32503_f3p1	295	Unique		c712_f18p8	900	Unique
c165026_f1p1	292	Unique		c3121_f1p0	895	Shared
c131143_f1p3	285	Unique		c40191_f3p3	893	Shared
c41235_f1p0	285	Unique		c68162_f1p1	893	Shared
c9628_f1p0	279	Unique		c40606_f1p1	890	Unique
c94632_f1p0	277	Shared		c164176_f1p0	883	Unique
c71338_f1p1	271	Shared		c95326_f1p2	882	Unique
c73086_f1p0	269	Unique		c127318_f1p2	874	Unique
c30422_f4p2	267	Unique		c40116_f3p2	872	Unique
c100046_f1p0	266	Unique		c6194_f1p9	870	Shared
c193248_f12p25	256	Unique		c94641_f3p6	868	Unique
